# Supplementary material for: Network Pharmacology and Experimental Validation Reveal the Effects of Chidamide Combined With Aspirin on Acute Myeloid Leukemia-Myelodysplastic Syndrome Cells Through PI3K/AKT Pathway
Source: Front Cell Dev Biol. 2021 Sep 9;9:685954. doi: 10.3389/fcell.2021.685954 (PMC8458633; doi:10.3389/fcell.2021.685954)
Supplement: Supplementary file 2 [file Table_2.XLSX]

## Sheet: MDS
Targets of Myelodysplastic Syndromes (MDS)
Gene Symbol	Description
TP53	Tumor Protein P53
MSH6	MutS Homolog 6
ATM	ATM Serine/Threonine Kinase
NF1	Neurofibromin 1
BRCA2	BRCA2 DNA Repair Associated
BRCA1	BRCA1 DNA Repair Associated
PTEN	Phosphatase And Tensin Homolog
WT1	WT1 Transcription Factor
HRAS	HRas Proto-Oncogene, GTPase
PTPN11	Protein Tyrosine Phosphatase Non-Receptor Type 11
NRAS	NRAS Proto-Oncogene, GTPase
ASXL1	ASXL Transcriptional Regulator 1
MSH2	MutS Homolog 2
DICER1	Dicer 1, Ribonuclease III
SETBP1	SET Binding Protein 1
TNF	Tumor Necrosis Factor
MLH1	MutL Homolog 1
U2AF1	U2 Small Nuclear RNA Auxiliary Factor 1
ATRX	ATRX Chromatin Remodeler
DNMT3A	DNA Methyltransferase 3 Alpha
NSD1	Nuclear Receptor Binding SET Domain Protein 1
KRAS	KRAS Proto-Oncogene, GTPase
NOTCH1	Notch Receptor 1
CHEK2	Checkpoint Kinase 2
AKT1	AKT Serine/Threonine Kinase 1
TET2	Tet Methylcytosine Dioxygenase 2
GATA2	GATA Binding Protein 2
JAK2	Janus Kinase 2
ERCC6	ERCC Excision Repair 6, Chromatin Remodeling Factor
PTCH1	Patched 1
KIT	KIT Proto-Oncogene, Receptor Tyrosine Kinase
WRN	WRN RecQ Like Helicase
CDKN2A	Cyclin Dependent Kinase Inhibitor 2A
RECQL4	RecQ Like Helicase 4
CBL	Cbl Proto-Oncogene
PDGFRB	Platelet Derived Growth Factor Receptor Beta
IL10	Interleukin 10
IL1B	Interleukin 1 Beta
CREBBP	CREB Binding Protein
FLT3	Fms Related Receptor Tyrosine Kinase 3
FAS	Fas Cell Surface Death Receptor
STAT3	Signal Transducer And Activator Of Transcription 3
ALB	Albumin
PMS2	PMS1 Homolog 2, Mismatch Repair System Component
FGFR1	Fibroblast Growth Factor Receptor 1
CDKN1C	Cyclin Dependent Kinase Inhibitor 1C
BLM	BLM RecQ Like Helicase
CDH1	Cadherin 1
KMT2A	Lysine Methyltransferase 2A
LIG4	DNA Ligase 4
EZH2	Enhancer Of Zeste 2 Polycomb Repressive Complex 2 Subunit
BRAF	B-Raf Proto-Oncogene, Serine/Threonine Kinase
NBN	Nibrin
KCNH2	Potassium Voltage-Gated Channel Subfamily H Member 2
RUNX1	RUNX Family Transcription Factor 1
KMT2D	Lysine Methyltransferase 2D
TERT	Telomerase Reverse Transcriptase
TNFRSF1A	TNF Receptor Superfamily Member 1A
SBDS	SBDS Ribosome Maturation Factor
PALB2	Partner And Localizer Of BRCA2
COL3A1	Collagen Type III Alpha 1 Chain
RAD50	RAD50 Double Strand Break Repair Protein
NPM1	Nucleophosmin 1
PIK3CA	Phosphatidylinositol-4,5-Bisphosphate 3-Kinase Catalytic Subunit Alpha
DNMT3B	DNA Methyltransferase 3 Beta
IDH1	Isocitrate Dehydrogenase (NADP(+)) 1
FASLG	Fas Ligand
PDGFRA	Platelet Derived Growth Factor Receptor Alpha
AR	Androgen Receptor
STAT5B	Signal Transducer And Activator Of Transcription 5B
ETV6	ETS Variant Transcription Factor 6
IFNG	Interferon Gamma
KITLG	KIT Ligand
CSF3R	Colony Stimulating Factor 3 Receptor
SALL4	Spalt Like Transcription Factor 4
MEN1	Menin 1
IGF1	Insulin Like Growth Factor 1
EP300	E1A Binding Protein P300
SF3B1	Splicing Factor 3b Subunit 1
RPS14	Ribosomal Protein S14
SRSF2	Serine And Arginine Rich Splicing Factor 2
HLA-DRB1	Major Histocompatibility Complex, Class II, DR Beta 1
BRIP1	BRCA1 Interacting Protein C-Terminal Helicase 1
RAF1	Raf-1 Proto-Oncogene, Serine/Threonine Kinase
CDK4	Cyclin Dependent Kinase 4
MRE11	MRE11 Homolog, Double Strand Break Repair Nuclease
LMNA	Lamin A/C
SMAD4	SMAD Family Member 4
WAS	WASP Actin Nucleation Promoting Factor
BARD1	BRCA1 Associated RING Domain 1
DNMT1	DNA Methyltransferase 1
PIGA	Phosphatidylinositol Glycan Anchor Biosynthesis Class A
RAD51	RAD51 Recombinase
MDM2	MDM2 Proto-Oncogene
MMP9	Matrix Metallopeptidase 9
FGFR3	Fibroblast Growth Factor Receptor 3
MPO	Myeloperoxidase
IDH2	Isocitrate Dehydrogenase (NADP(+)) 2
SOS1	SOS Ras/Rac Guanine Nucleotide Exchange Factor 1
B2M	Beta-2-Microglobulin
XIAP	X-Linked Inhibitor Of Apoptosis
TERC	Telomerase RNA Component
CASP8	Caspase 8
CTNNB1	Catenin Beta 1
MPL	MPL Proto-Oncogene, Thrombopoietin Receptor
SDHB	Succinate Dehydrogenase Complex Iron Sulfur Subunit B
MTOR	Mechanistic Target Of Rapamycin Kinase
LYST	Lysosomal Trafficking Regulator
FLNA	Filamin A
CDKN2B	Cyclin Dependent Kinase Inhibitor 2B
IL6	Interleukin 6
FOS	Fos Proto-Oncogene, AP-1 Transcription Factor Subunit
STAT1	Signal Transducer And Activator Of Transcription 1
TCOF1	Treacle Ribosome Biogenesis Factor 1
RTEL1	Regulator Of Telomere Elongation Helicase 1
GATA1	GATA Binding Protein 1
HPRT1	Hypoxanthine Phosphoribosyltransferase 1
ACTB	Actin Beta
CXCR4	C-X-C Motif Chemokine Receptor 4
ABL1	ABL Proto-Oncogene 1, Non-Receptor Tyrosine Kinase
THBD	Thrombomodulin
HOXD13	Homeobox D13
ERBB2	Erb-B2 Receptor Tyrosine Kinase 2
TLR2	Toll Like Receptor 2
LZTR1	Leucine Zipper Like Transcription Regulator 1
PRF1	Perforin 1
TGFB1	Transforming Growth Factor Beta 1
SMC1A	Structural Maintenance Of Chromosomes 1A
SPRED1	Sprouty Related EVH1 Domain Containing 1
CDKN1A	Cyclin Dependent Kinase Inhibitor 1A
HLA-A	Major Histocompatibility Complex, Class I, A
TGFB2	Transforming Growth Factor Beta 2
BTK	Bruton Tyrosine Kinase
RAD51C	RAD51 Paralog C
BMP4	Bone Morphogenetic Protein 4
MAP2K1	Mitogen-Activated Protein Kinase Kinase 1
IL7	Interleukin 7
DKC1	Dyskerin Pseudouridine Synthase 1
KAT6A	Lysine Acetyltransferase 6A
CSF3	Colony Stimulating Factor 3
SAMD9L	Sterile Alpha Motif Domain Containing 9 Like
TNFRSF1B	TNF Receptor Superfamily Member 1B
CTNNA1	Catenin Alpha 1
FOXP3	Forkhead Box P3
ELN	Elastin
EFL1	Elongation Factor Like GTPase 1
HAX1	HCLS1 Associated Protein X-1
SMC3	Structural Maintenance Of Chromosomes 3
CXCL12	C-X-C Motif Chemokine Ligand 12
SHOC2	SHOC2 Leucine Rich Repeat Scaffold Protein
SAMD9	Sterile Alpha Motif Domain Containing 9
PRDM16	PR/SET Domain 16
RAD51D	RAD51 Paralog D
DNAJC21	DnaJ Heat Shock Protein Family (Hsp40) Member C21
IRF1	Interferon Regulatory Factor 1
CCR6	C-C Motif Chemokine Receptor 6
EPO	Erythropoietin
MECOM	MDS1 And EVI1 Complex Locus
ITGAM	Integrin Subunit Alpha M
RASA1	RAS P21 Protein Activator 1
SOS2	SOS Ras/Rho Guanine Nucleotide Exchange Factor 2
RB1	RB Transcriptional Corepressor 1
KDM6A	Lysine Demethylase 6A
DLK1	Delta Like Non-Canonical Notch Ligand 1
H2AC18	H2A Clustered Histone 18
ITGA2B	Integrin Subunit Alpha 2b
ERCC4	ERCC Excision Repair 4, Endonuclease Catalytic Subunit
ENG	Endoglin
ANKRD26	Ankyrin Repeat Domain 26
CTLA4	Cytotoxic T-Lymphocyte Associated Protein 4
SETD2	SET Domain Containing 2, Histone Lysine Methyltransferase
CDKN1B	Cyclin Dependent Kinase Inhibitor 1B
PRKG1	Protein Kinase CGMP-Dependent 1
VHL	Von Hippel-Lindau Tumor Suppressor
VEGFA	Vascular Endothelial Growth Factor A
FANCC	FA Complementation Group C
FANCD2	FA Complementation Group D2
MEG3	Maternally Expressed 3
STAG2	Stromal Antigen 2
CSF2	Colony Stimulating Factor 2
PLCB1	Phospholipase C Beta 1
RAB27A	RAB27A, Member RAS Oncogene Family
PROM1	Prominin 1
EGFR	Epidermal Growth Factor Receptor
SOX2	SRY-Box Transcription Factor 2
HGF	Hepatocyte Growth Factor
HFE	Homeostatic Iron Regulator
ERCC2	ERCC Excision Repair 2, TFIIH Core Complex Helicase Subunit
TINF2	TERF1 Interacting Nuclear Factor 2
CD55	CD55 Molecule (Cromer Blood Group)
ESCO2	Establishment Of Sister Chromatid Cohesion N-Acetyltransferase 2
MGMT	O-6-Methylguanine-DNA Methyltransferase
CXCL8	C-X-C Motif Chemokine Ligand 8
BCOR	BCL6 Corepressor
PURA	Purine Rich Element Binding Protein A
FLT1	Fms Related Receptor Tyrosine Kinase 1
NLRP3	NLR Family Pyrin Domain Containing 3
SH2D1A	SH2 Domain Containing 1A
NIPBL	NIPBL Cohesin Loading Factor
POLR1D	RNA Polymerase I And III Subunit D
PPARG	Peroxisome Proliferator Activated Receptor Gamma
ATP7A	ATPase Copper Transporting Alpha
SRP72	Signal Recognition Particle 72
FN1	Fibronectin 1
MIR34A	MicroRNA 34a
EGF	Epidermal Growth Factor
GNB1	G Protein Subunit Beta 1
FANCA	FA Complementation Group A
RPS19	Ribosomal Protein S19
APOE	Apolipoprotein E
PARN	Poly(A)-Specific Ribonuclease
MYCN	MYCN Proto-Oncogene, BHLH Transcription Factor
ARHGAP26	Rho GTPase Activating Protein 26
CD40LG	CD40 Ligand
RIT1	Ras Like Without CAAX 1
MITF	Melanocyte Inducing Transcription Factor
CD27	CD27 Molecule
AURKA	Aurora Kinase A
ASXL2	ASXL Transcriptional Regulator 2
COL1A2	Collagen Type I Alpha 2 Chain
ERCC1	ERCC Excision Repair 1, Endonuclease Non-Catalytic Subunit
PDCD1	Programmed Cell Death 1
CDKN3	Cyclin Dependent Kinase Inhibitor 3
FHIT	Fragile Histidine Triad Diadenosine Triphosphatase
CCND1	Cyclin D1
MAPK1	Mitogen-Activated Protein Kinase 1
TGFBR2	Transforming Growth Factor Beta Receptor 2
IL13	Interleukin 13
RRAS	RAS Related
IL2	Interleukin 2
POLE	DNA Polymerase Epsilon, Catalytic Subunit
HLA-B	Major Histocompatibility Complex, Class I, B
IL1RN	Interleukin 1 Receptor Antagonist
NUP214	Nucleoporin 214
ATR	ATR Serine/Threonine Kinase
NUP98	Nucleoporin 98 And 96 Precursor
HELLS	Helicase, Lymphoid Specific
CRBN	Cereblon
DDX11	DEAD/H-Box Helicase 11
LEP	Leptin
TP63	Tumor Protein P63
CEBPA	CCAAT Enhancer Binding Protein Alpha
IGF1R	Insulin Like Growth Factor 1 Receptor
NUP133	Nucleoporin 133
MYH11	Myosin Heavy Chain 11
BAP1	BRCA1 Associated Protein 1
HAMP	Hepcidin Antimicrobial Peptide
ESR1	Estrogen Receptor 1
LRRC56	Leucine Rich Repeat Containing 56
ALK	ALK Receptor Tyrosine Kinase
RPL5	Ribosomal Protein L5
RARS1	Arginyl-TRNA Synthetase 1
MIR378A	MicroRNA 378a
MYD88	MYD88 Innate Immune Signal Transduction Adaptor
RPS28	Ribosomal Protein S28
CD19	CD19 Molecule
CDC45	Cell Division Cycle 45
RPS26	Ribosomal Protein S26
FGF2	Fibroblast Growth Factor 2
IL3	Interleukin 3
MLF1	Myeloid Leukemia Factor 1
MDS2	Myelodysplastic Syndrome 2 Translocation Associated
TOP2A	DNA Topoisomerase II Alpha
DDX41	DEAD-Box Helicase 41
TCF4	Transcription Factor 4
MIR127	MicroRNA 127
TGFBR1	Transforming Growth Factor Beta Receptor 1
POT1	Protection Of Telomeres 1
VWF	Von Willebrand Factor
THPO	Thrombopoietin
MRAS	Muscle RAS Oncogene Homolog
MIR17	MicroRNA 17
MIR21	MicroRNA 21
NOD2	Nucleotide Binding Oligomerization Domain Containing 2
MYC	MYC Proto-Oncogene, BHLH Transcription Factor
CD34	CD34 Molecule
RECQL	RecQ Like Helicase
TGM1	Transglutaminase 1
SRC	SRC Proto-Oncogene, Non-Receptor Tyrosine Kinase
SUZ12	SUZ12 Polycomb Repressive Complex 2 Subunit
SH2B3	SH2B Adaptor Protein 3
CD8A	CD8a Molecule
ADA2	Adenosine Deaminase 2
MIR10A	MicroRNA 10a
DPM1	Dolichyl-Phosphate Mannosyltransferase Subunit 1, Catalytic
CASP3	Caspase 3
RUNX2	RUNX Family Transcription Factor 2
NT5E	5'-Nucleotidase Ecto
PHF6	PHD Finger Protein 6
POLR3A	RNA Polymerase III Subunit A
PRKN	Parkin RBR E3 Ubiquitin Protein Ligase
SKIV2L	Ski2 Like RNA Helicase
G6PC3	Glucose-6-Phosphatase Catalytic Subunit 3
F5	Coagulation Factor V
RPL26	Ribosomal Protein L26
NOP10	NOP10 Ribonucleoprotein
XRCC2	X-Ray Repair Cross Complementing 2
SEC23B	SEC23 Homolog B, COPII Coat Complex Component
DCLRE1C	DNA Cross-Link Repair 1C
RPS17	Ribosomal Protein S17
FLVCR1	FLVCR Heme Transporter 1
LBR	Lamin B Receptor
RPL11	Ribosomal Protein L11
RPL35A	Ribosomal Protein L35a
STAT5A	Signal Transducer And Activator Of Transcription 5A
RRAS2	RAS Related 2
CD28	CD28 Molecule
GNAS	GNAS Complex Locus
SHH	Sonic Hedgehog Signaling Molecule
CTCF	CCCTC-Binding Factor
GATA3	GATA Binding Protein 3
IL4	Interleukin 4
RPS24	Ribosomal Protein S24
MT-CO1	Mitochondrially Encoded Cytochrome C Oxidase I
MIR155	MicroRNA 155
RBBP8	RB Binding Protein 8, Endonuclease
NHP2	NHP2 Ribonucleoprotein
RPS10	Ribosomal Protein S10
HTT	Huntingtin
ATRIP	ATR Interacting Protein
C3	Complement C3
IGF2R	Insulin Like Growth Factor 2 Receptor
RPL15	Ribosomal Protein L15
TSR2	TSR2 Ribosome Maturation Factor
RASA2	RAS P21 Protein Activator 2
IGF2	Insulin Like Growth Factor 2
TWIST1	Twist Family BHLH Transcription Factor 1
IL1A	Interleukin 1 Alpha
MIR483	MicroRNA 483
LUC7L2	LUC7 Like 2, Pre-MRNA Splicing Factor
HMMR	Hyaluronan Mediated Motility Receptor
RMRP	RNA Component Of Mitochondrial RNA Processing Endoribonuclease
BAX	BCL2 Associated X, Apoptosis Regulator
LTA	Lymphotoxin Alpha
ELANE	Elastase, Neutrophil Expressed
HLA-DQB1	Major Histocompatibility Complex, Class II, DQ Beta 1
BGN	Biglycan
IL7R	Interleukin 7 Receptor
DNA2	DNA Replication Helicase/Nuclease 2
KMT2B	Lysine Methyltransferase 2B
NBAS	NBAS Subunit Of NRZ Tethering Complex
TXNL4A	Thioredoxin Like 4A
CYCS	Cytochrome C, Somatic
ADA	Adenosine Deaminase
CSF1R	Colony Stimulating Factor 1 Receptor
RPS29	Ribosomal Protein S29
TOP1	DNA Topoisomerase I
CD96	CD96 Molecule
XPA	XPA, DNA Damage Recognition And Repair Factor
GRHL2	Grainyhead Like Transcription Factor 2
PRL	Prolactin
CALR	Calreticulin
BMP6	Bone Morphogenetic Protein 6
CSF1	Colony Stimulating Factor 1
UNC13D	Unc-13 Homolog D
MIR150	MicroRNA 150
SMARCB1	SWI/SNF Related, Matrix Associated, Actin Dependent Regulator Of Chromatin, Subfamily B, Member 1
KMT2C	Lysine Methyltransferase 2C
NTRK1	Neurotrophic Receptor Tyrosine Kinase 1
SPTAN1	Spectrin Alpha, Non-Erythrocytic 1
ANXA5	Annexin A5
ABCB1	ATP Binding Cassette Subfamily B Member 1
PBX1	PBX Homeobox 1
ITGB3	Integrin Subunit Beta 3
TFRC	Transferrin Receptor
MTHFR	Methylenetetrahydrofolate Reductase
RNF168	Ring Finger Protein 168
SRP54	Signal Recognition Particle 54
ARID1A	AT-Rich Interaction Domain 1A
CD4	CD4 Molecule
CHEK1	Checkpoint Kinase 1
GSTM1	Glutathione S-Transferase Mu 1
USB1	U6 SnRNA Biogenesis Phosphodiesterase 1
WRAP53	WD Repeat Containing Antisense To TP53
MAPK3	Mitogen-Activated Protein Kinase 3
NBEAL2	Neurobeachin Like 2
KDM1A	Lysine Demethylase 1A
FTL	Ferritin Light Chain
CIITA	Class II Major Histocompatibility Complex Transactivator
KDR	Kinase Insert Domain Receptor
IFNA1	Interferon Alpha 1
FIP1L1	Factor Interacting With PAPOLA And CPSF1
SLC12A6	Solute Carrier Family 12 Member 6
MIR146A	MicroRNA 146a
MEFV	MEFV Innate Immuity Regulator, Pyrin
STXBP2	Syntaxin Binding Protein 2
MIR126	MicroRNA 126
HDAC9	Histone Deacetylase 9
MIRLET7A1	MicroRNA Let-7a-1
GSTP1	Glutathione S-Transferase Pi 1
IDUA	Alpha-L-Iduronidase
ACTG1	Actin Gamma 1
DDB2	Damage Specific DNA Binding Protein 2
SIRT1	Sirtuin 1
EMG1	EMG1 N1-Specific Pseudouridine Methyltransferase
CD46	CD46 Molecule
BIRC5	Baculoviral IAP Repeat Containing 5
COLEC10	Collectin Subfamily Member 10
CTC1	CST Telomere Replication Complex Component 1
H2AX	H2A.X Variant Histone
CYP3A4	Cytochrome P450 Family 3 Subfamily A Member 4
PRPF8	Pre-MRNA Processing Factor 8
LEMD3	LEM Domain Containing 3
CDC6	Cell Division Cycle 6
TCF12	Transcription Factor 12
BUB1B	BUB1 Mitotic Checkpoint Serine/Threonine Kinase B
TET3	Tet Methylcytosine Dioxygenase 3
IL2RA	Interleukin 2 Receptor Subunit Alpha
FANCM	FA Complementation Group M
MIR31	MicroRNA 31
SMARCAL1	SWI/SNF Related, Matrix Associated, Actin Dependent Regulator Of Chromatin, Subfamily A Like 1
VDR	Vitamin D Receptor
RMI2	RecQ Mediated Genome Instability 2
KLF1	Kruppel Like Factor 1
RRM2B	Ribonucleotide Reductase Regulatory TP53 Inducible Subunit M2B
PRODH	Proline Dehydrogenase 1
MTR	5-Methyltetrahydrofolate-Homocysteine Methyltransferase
RPS27	Ribosomal Protein S27
IKZF1	IKAROS Family Zinc Finger 1
HLA-C	Major Histocompatibility Complex, Class I, C
SERPINA3	Serpin Family A Member 3
NHEJ1	Non-Homologous End Joining Factor 1
MIR181A1	MicroRNA 181a-1
MIR22	MicroRNA 22
MIR125A	MicroRNA 125a
SLX4	SLX4 Structure-Specific Endonuclease Subunit
MIR196A1	MicroRNA 196a-1
CD80	CD80 Molecule
POLR1A	RNA Polymerase I Subunit A
MAPK14	Mitogen-Activated Protein Kinase 14
NOTCH2	Notch Receptor 2
CRP	C-Reactive Protein
EPOR	Erythropoietin Receptor
PURB	Purine Rich Element Binding Protein B
MIR222	MicroRNA 222
LOC107133509	NUP98-NSD3 Recombination Region
GZMB	Granzyme B
CCL3	C-C Motif Chemokine Ligand 3
MIR140	MicroRNA 140
FANCI	FA Complementation Group I
GFI1	Growth Factor Independent 1 Transcriptional Repressor
ACD	ACD Shelterin Complex Subunit And Telomerase Recruitment Factor
ADIPOQ	Adiponectin, C1Q And Collagen Domain Containing
MAPK8	Mitogen-Activated Protein Kinase 8
MIR18A	MicroRNA 18a
GSTT1	Glutathione S-Transferase Theta 1
MT-CO2	Mitochondrially Encoded Cytochrome C Oxidase II
STX11	Syntaxin 11
CREB1	CAMP Responsive Element Binding Protein 1
TNFSF10	TNF Superfamily Member 10
RAC2	Rac Family Small GTPase 2
HNRNPK	Heterogeneous Nuclear Ribonucleoprotein K
MIR221	MicroRNA 221
NQO1	NAD(P)H Quinone Dehydrogenase 1
RPL31	Ribosomal Protein L31
FANCB	FA Complementation Group B
MEIS1	Meis Homeobox 1
HDAC6	Histone Deacetylase 6
SOCS1	Suppressor Of Cytokine Signaling 1
MIR223	MicroRNA 223
MCL1	MCL1 Apoptosis Regulator, BCL2 Family Member
MSH3	MutS Homolog 3
IL18	Interleukin 18
DNTT	DNA Nucleotidylexotransferase
CDK2	Cyclin Dependent Kinase 2
CD38	CD38 Molecule
CD40	CD40 Molecule
GH1	Growth Hormone 1
INPP4A	Inositol Polyphosphate-4-Phosphatase Type I A
FANCF	FA Complementation Group F
CD59	CD59 Molecule (CD59 Blood Group)
SKI	SKI Proto-Oncogene
ABCB7	ATP Binding Cassette Subfamily B Member 7
MVK	Mevalonate Kinase
FCGR3B	Fc Fragment Of IgG Receptor IIIb
MC1R	Melanocortin 1 Receptor
CFLAR	CASP8 And FADD Like Apoptosis Regulator
MIR15B	MicroRNA 15b
ITGAX	Integrin Subunit Alpha X
MIR204	MicroRNA 204
MT-TL1	Mitochondrially Encoded TRNA-Leu (UUA/G) 1
PIGN	Phosphatidylinositol Glycan Anchor Biosynthesis Class N
STAT4	Signal Transducer And Activator Of Transcription 4
KIR3DL1	Killer Cell Immunoglobulin Like Receptor, Three Ig Domains And Long Cytoplasmic Tail 1
REV3L	REV3 Like, DNA Directed Polymerase Zeta Catalytic Subunit
IL11	Interleukin 11
ANGPT1	Angiopoietin 1
KRT1	Keratin 1
EMD	Emerin
MIR23B	MicroRNA 23b
CR1	Complement C3b/C4b Receptor 1 (Knops Blood Group)
CEP57	Centrosomal Protein 57
ACSL6	Acyl-CoA Synthetase Long Chain Family Member 6
IRF8	Interferon Regulatory Factor 8
TNFRSF10B	TNF Receptor Superfamily Member 10b
NDUFA1	NADH:Ubiquinone Oxidoreductase Subunit A1
PTPN22	Protein Tyrosine Phosphatase Non-Receptor Type 22
HERC2	HECT And RLD Domain Containing E3 Ubiquitin Protein Ligase 2
CD68	CD68 Molecule
MIR210	MicroRNA 210
CTBP1	C-Terminal Binding Protein 1
NFKBIA	NFKB Inhibitor Alpha
ID4	Inhibitor Of DNA Binding 4, HLH Protein
TNFRSF10A	TNF Receptor Superfamily Member 10a
HDC	Histidine Decarboxylase
TLR4	Toll Like Receptor 4
C1GALT1C1	C1GALT1 Specific Chaperone 1
MIR145	MicroRNA 145
SERPINC1	Serpin Family C Member 1
DYSF	Dysferlin
SNRPN	Small Nuclear Ribonucleoprotein Polypeptide N
XRCC4	X-Ray Repair Cross Complementing 4
MYB	MYB Proto-Oncogene, Transcription Factor
VAMP7	Vesicle Associated Membrane Protein 7
CLEC12A	C-Type Lectin Domain Family 12 Member A
LMNB2	Lamin B2
THY1	Thy-1 Cell Surface Antigen
MIR29B1	MicroRNA 29b-1
MME	Membrane Metalloendopeptidase
BCL2	BCL2 Apoptosis Regulator
ANPEP	Alanyl Aminopeptidase, Membrane
BCR	BCR Activator Of RhoGEF And GTPase
LOC106992256	T(11;20)(P15;Q11) Topoisomerase (DNA) I Recombination Region
CD69	CD69 Molecule
CD33	CD33 Molecule
LMNB1	Lamin B1
JAK3	Janus Kinase 3
FOXH1	Forkhead Box H1
EGR1	Early Growth Response 1
BIRC2	Baculoviral IAP Repeat Containing 2
FLI1	Fli-1 Proto-Oncogene, ETS Transcription Factor
LEPR	Leptin Receptor
IER3	Immediate Early Response 3
HBG1	Hemoglobin Subunit Gamma 1
HIF1A	Hypoxia Inducible Factor 1 Subunit Alpha
BMI1	BMI1 Proto-Oncogene, Polycomb Ring Finger
GYPA	Glycophorin A (MNS Blood Group)
RPL18	Ribosomal Protein L18
RPL22	Ribosomal Protein L22
GFI1B	Growth Factor Independent 1B Transcriptional Repressor
IL3RA	Interleukin 3 Receptor Subunit Alpha
HEPACAM2	HEPACAM Family Member 2
GP1BA	Glycoprotein Ib Platelet Subunit Alpha
KLRK1	Killer Cell Lectin Like Receptor K1
ZRSR2	Zinc Finger CCCH-Type, RNA Binding Motif And Serine/Arginine Rich 2
RAD21	RAD21 Cohesin Complex Component
ACP5	Acid Phosphatase 5, Tartrate Resistant
MIR15A	MicroRNA 15a
HOXA1	Homeobox A1
FTMT	Ferritin Mitochondrial
RBM10	RNA Binding Motif Protein 10
KDM4C	Lysine Demethylase 4C
HDAC8	Histone Deacetylase 8
MMP2	Matrix Metallopeptidase 2
MYH9	Myosin Heavy Chain 9
MIRLET7C	MicroRNA Let-7c
SRCAP	Snf2 Related CREBBP Activator Protein
GAPDH	Glyceraldehyde-3-Phosphate Dehydrogenase
DCK	Deoxycytidine Kinase
ERCC6L2	ERCC Excision Repair 6 Like 2
AURKB	Aurora Kinase B
SF3B2	Splicing Factor 3b Subunit 2
MIR182	MicroRNA 182
ACP1	Acid Phosphatase 1
XRCC3	X-Ray Repair Cross Complementing 3
DIAPH1	Diaphanous Related Formin 1
HOXA9	Homeobox A9
STN1	STN1 Subunit Of CST Complex
MN1	MN1 Proto-Oncogene, Transcriptional Regulator
DAPK1	Death Associated Protein Kinase 1
MIR376A1	MicroRNA 376a-1
RPSA	Ribosomal Protein SA
TERF2IP	TERF2 Interacting Protein
PRDM10	PR/SET Domain 10
PARP1	Poly(ADP-Ribose) Polymerase 1
KRT16	Keratin 16
MIR23A	MicroRNA 23a
APAF1	Apoptotic Peptidase Activating Factor 1
MIR27A	MicroRNA 27a
LIN28B	Lin-28 Homolog B
RETN	Resistin
BCORL1	BCL6 Corepressor Like 1
IL1R1	Interleukin 1 Receptor Type 1
SERPINE1	Serpin Family E Member 1
ICOSLG	Inducible T Cell Costimulator Ligand
HAVCR2	Hepatitis A Virus Cellular Receptor 2
CDCA7	Cell Division Cycle Associated 7
ERBB3	Erb-B2 Receptor Tyrosine Kinase 3
CDA	Cytidine Deaminase
H3-2	H3.2 Histone (Putative)
AXL	AXL Receptor Tyrosine Kinase
TMPO	Thymopoietin
MIRLET7B	MicroRNA Let-7b
RPS3A	Ribosomal Protein S3A
IGHE	Immunoglobulin Heavy Constant Epsilon
PAX5	Paired Box 5
PAFAH1B1	Platelet Activating Factor Acetylhydrolase 1b Regulatory Subunit 1
MNDA	Myeloid Cell Nuclear Differentiation Antigen
FLT3LG	Fms Related Receptor Tyrosine Kinase 3 Ligand
SULT2B1	Sulfotransferase Family 2B Member 1
FAN1	FANCD2 And FANCI Associated Nuclease 1
SLC29A1	Solute Carrier Family 29 Member 1 (Augustine Blood Group)
FANCG	FA Complementation Group G
ZBTB16	Zinc Finger And BTB Domain Containing 16
AOPEP	Aminopeptidase O (Putative)
DHFR	Dihydrofolate Reductase
TLR9	Toll Like Receptor 9
PSAP	Prosaposin
PUS7	Pseudouridine Synthase 7
MIR34B	MicroRNA 34b
TAC1	Tachykinin Precursor 1
SLC25A37	Solute Carrier Family 25 Member 37
MIR195	MicroRNA 195
IFNA2	Interferon Alpha 2
RNU12-2P	RNA, U12 Small Nuclear 2, Pseudogene
ITK	IL2 Inducible T Cell Kinase
TERF1	Telomeric Repeat Binding Factor 1
SLC19A1	Solute Carrier Family 19 Member 1
DDX10	DEAD-Box Helicase 10
TBX21	T-Box Transcription Factor 21
MIR184	MicroRNA 184
VPS45	Vacuolar Protein Sorting 45 Homolog
CD79A	CD79a Molecule
RPL6	Ribosomal Protein L6
MIR532	MicroRNA 532
KDM6B	Lysine Demethylase 6B
RPL21	Ribosomal Protein L21
CD226	CD226 Molecule
BCL2L10	BCL2 Like 10
TP53BP1	Tumor Protein P53 Binding Protein 1
JUN	Jun Proto-Oncogene, AP-1 Transcription Factor Subunit
NSMCE3	NSE3 Homolog, SMC5-SMC6 Complex Component
HSP90AA1	Heat Shock Protein 90 Alpha Family Class A Member 1
MYSM1	Myb Like, SWIRM And MPN Domains 1
XRCC5	X-Ray Repair Cross Complementing 5
F2R	Coagulation Factor II Thrombin Receptor
MIR335	MicroRNA 335
IL15	Interleukin 15
MIR106B	MicroRNA 106b
CLPB	Caseinolytic Mitochondrial Matrix Peptidase Chaperone Subunit B
MIR9-1	MicroRNA 9-1
MACROH2A1	MacroH2A.1 Histone
HNF1A	HNF1 Homeobox A
DIABLO	Diablo IAP-Binding Mitochondrial Protein
DCLRE1B	DNA Cross-Link Repair 1B
PTPRC	Protein Tyrosine Phosphatase Receptor Type C
RPS23	Ribosomal Protein S23
GLI1	GLI Family Zinc Finger 1
JAGN1	Jagunal Homolog 1
F2	Coagulation Factor II, Thrombin
CEBPE	CCAAT Enhancer Binding Protein Epsilon
XRCC6	X-Ray Repair Cross Complementing 6
BOK	BCL2 Family Apoptosis Regulator BOK
CDK6	Cyclin Dependent Kinase 6
MNX1	Motor Neuron And Pancreas Homeobox 1
MAN1B1	Mannosidase Alpha Class 1B Member 1
DPAGT1	Dolichyl-Phosphate N-Acetylglucosaminephosphotransferase 1
MCAM	Melanoma Cell Adhesion Molecule
RHBDF2	Rhomboid 5 Homolog 2
HOXA13	Homeobox A13
RPS27A	Ribosomal Protein S27a
CD44	CD44 Molecule (Indian Blood Group)
TGM6	Transglutaminase 6
RPL35	Ribosomal Protein L35
HLA-DPB1	Major Histocompatibility Complex, Class II, DP Beta 1
IKBKG	Inhibitor Of Nuclear Factor Kappa B Kinase Regulatory Subunit Gamma
CENPE	Centromere Protein E
CXXC4	CXXC Finger Protein 4
CDK10	Cyclin Dependent Kinase 10
UTP4	UTP4 Small Subunit Processome Component
FEN1	Flap Structure-Specific Endonuclease 1
FANCL	FA Complementation Group L
NFE2L2	Nuclear Factor, Erythroid 2 Like 2
RPL27	Ribosomal Protein L27
SNHG4	Small Nucleolar RNA Host Gene 4
CUL4B	Cullin 4B
SST	Somatostatin
TERF2	Telomeric Repeat Binding Factor 2
IDS	Iduronate 2-Sulfatase
CCND2	Cyclin D2
RARB	Retinoic Acid Receptor Beta
EIF6	Eukaryotic Translation Initiation Factor 6
HSPA9	Heat Shock Protein Family A (Hsp70) Member 9
CD274	CD274 Molecule
ASXL3	ASXL Transcriptional Regulator 3
IL23R	Interleukin 23 Receptor
MIR34C	MicroRNA 34c
MIR451A	MicroRNA 451a
GRB2	Growth Factor Receptor Bound Protein 2
MIR199B	MicroRNA 199b
MIR30E	MicroRNA 30e
MIR128-1	MicroRNA 128-1
FRA11B	Fragile Site, Folic Acid Type, Rare, Fra(11)(Q23.3)
PSMD4	Proteasome 26S Subunit, Non-ATPase 4
HDAC1	Histone Deacetylase 1
ABRAXAS1	Abraxas 1, BRCA1 A Complex Subunit
POU5F1	POU Class 5 Homeobox 1
SPARC	Secreted Protein Acidic And Cysteine Rich
MIR181A2	MicroRNA 181a-2
PIK3CD	Phosphatidylinositol-4,5-Bisphosphate 3-Kinase Catalytic Subunit Delta
FANCE	FA Complementation Group E
MIR29A	MicroRNA 29a
MTAP	Methylthioadenosine Phosphorylase
FBL	Fibrillarin
IGFBP3	Insulin Like Growth Factor Binding Protein 3
ANXA2	Annexin A2
MCM9	Minichromosome Maintenance 9 Homologous Recombination Repair Factor
MIR432	MicroRNA 432
CBFB	Core-Binding Factor Subunit Beta
LEF1	Lymphoid Enhancer Binding Factor 1
CP	Ceruloplasmin
MIR181C	MicroRNA 181c
RPL38	Ribosomal Protein L38
MUC1	Mucin 1, Cell Surface Associated
MIR324	MicroRNA 324
NFU1	NFU1 Iron-Sulfur Cluster Scaffold
RPS6KB1	Ribosomal Protein S6 Kinase B1
RPS7	Ribosomal Protein S7
RPS6	Ribosomal Protein S6
MIR30D	MicroRNA 30d
RPS15A	Ribosomal Protein S15a
MIR183	MicroRNA 183
SYK	Spleen Associated Tyrosine Kinase
DHODH	Dihydroorotate Dehydrogenase (Quinone)
VIM	Vimentin
VCAM1	Vascular Cell Adhesion Molecule 1
RARA	Retinoic Acid Receptor Alpha
CNTLN	Centlein
NCOR1	Nuclear Receptor Corepressor 1
HNRNPA2B1	Heterogeneous Nuclear Ribonucleoprotein A2/B1
AIFM1	Apoptosis Inducing Factor Mitochondria Associated 1
GTF2I	General Transcription Factor IIi
MTRR	5-Methyltetrahydrofolate-Homocysteine Methyltransferase Reductase
SPI1	Spi-1 Proto-Oncogene
EIF2AK2	Eukaryotic Translation Initiation Factor 2 Alpha Kinase 2
PTPA	Protein Phosphatase 2 Phosphatase Activator
CBS	Cystathionine Beta-Synthase
CTSG	Cathepsin G
MIR326	MicroRNA 326
MIR320A	MicroRNA 320a
SET	SET Nuclear Proto-Oncogene
UBE2T	Ubiquitin Conjugating Enzyme E2 T
KCNH1	Potassium Voltage-Gated Channel Subfamily H Member 1
MIR142	MicroRNA 142
NMD3	NMD3 Ribosome Export Adaptor
XRCC1	X-Ray Repair Cross Complementing 1
EIF4E	Eukaryotic Translation Initiation Factor 4E
U2AF1L4	U2 Small Nuclear RNA Auxiliary Factor 1 Like 4
EED	Embryonic Ectoderm Development
PICALM	Phosphatidylinositol Binding Clathrin Assembly Protein
RECQL5	RecQ Like Helicase 5
CD70	CD70 Molecule
RPS25	Ribosomal Protein S25
SPN	Sialophorin
TF	Transferrin
FCGR3A	Fc Fragment Of IgG Receptor IIIa
HBB	Hemoglobin Subunit Beta
EXO1	Exonuclease 1
RMI1	RecQ Mediated Genome Instability 1
FTH1	Ferritin Heavy Chain 1
MAD2L2	Mitotic Arrest Deficient 2 Like 2
NFKB1	Nuclear Factor Kappa B Subunit 1
TCIRG1	T Cell Immune Regulator 1, ATPase H+ Transporting V0 Subunit A3
BGLAP	Bone Gamma-Carboxyglutamate Protein
BCL6	BCL6 Transcription Repressor
ETNK1	Ethanolamine Kinase 1
RPS20	Ribosomal Protein S20
NEK2	NIMA Related Kinase 2
NANOG	Nanog Homeobox
ICAM1	Intercellular Adhesion Molecule 1
TCF3	Transcription Factor 3
KLF4	Kruppel Like Factor 4
TNFRSF6B	TNF Receptor Superfamily Member 6b
LPP	LIM Domain Containing Preferred Translocation Partner In Lipoma
SLC17A5	Solute Carrier Family 17 Member 5
IGHV4-38-2	Immunoglobulin Heavy Variable 4-38-2
H4-16	H4 Histone 16
PSMD5	Proteasome 26S Subunit, Non-ATPase 5
IL12A	Interleukin 12A
POLH	DNA Polymerase Eta
F3	Coagulation Factor III, Tissue Factor
RSL24D1	Ribosomal L24 Domain Containing 1
MIR328	MicroRNA 328
IL12B	Interleukin 12B
TET1	Tet Methylcytosine Dioxygenase 1
IL17A	Interleukin 17A
CALCA	Calcitonin Related Polypeptide Alpha
MUS81	MUS81 Structure-Specific Endonuclease Subunit
PRKDC	Protein Kinase, DNA-Activated, Catalytic Subunit
HSPA4	Heat Shock Protein Family A (Hsp70) Member 4
H4C13	H4 Clustered Histone 13
LSG1	Large 60S Subunit Nuclear Export GTPase 1
H4C8	H4 Clustered Histone 8
H4C9	H4 Clustered Histone 9
H4C15	H4 Clustered Histone 15
DNM1L	Dynamin 1 Like
MALAT1	Metastasis Associated Lung Adenocarcinoma Transcript 1
DIAPH3	Diaphanous Related Formin 3
ABCC1	ATP Binding Cassette Subfamily C Member 1
RHOA	Ras Homolog Family Member A
RNLS	Renalase, FAD Dependent Amine Oxidase
PML	PML Nuclear Body Scaffold
IRF3	Interferon Regulatory Factor 3
SIGLEC5	Sialic Acid Binding Ig Like Lectin 5
DBA2	Diamond-Blackfan Anemia 2
CEBPB	CCAAT Enhancer Binding Protein Beta
NIP7	Nucleolar Pre-RRNA Processing Protein NIP7
PUS1	Pseudouridine Synthase 1
RPL3	Ribosomal Protein L3
ZAP70	Zeta Chain Of T Cell Receptor Associated Protein Kinase 70
TUBG1	Tubulin Gamma 1
CCR5	C-C Motif Chemokine Receptor 5
CYP1A1	Cytochrome P450 Family 1 Subfamily A Member 1
H4C1	H4 Clustered Histone 1
FBXW7	F-Box And WD Repeat Domain Containing 7
AGO2	Argonaute RISC Catalytic Component 2
SEMA3A	Semaphorin 3A
JAK1	Janus Kinase 1
CBSL	Cystathionine Beta-Synthase Like
ESCO1	Establishment Of Sister Chromatid Cohesion N-Acetyltransferase 1
MIR612	MicroRNA 612
NCAM1	Neural Cell Adhesion Molecule 1
GGT1	Gamma-Glutamyltransferase 1
MIR30A	MicroRNA 30a
MIR337	MicroRNA 337
RIPK1	Receptor Interacting Serine/Threonine Kinase 1
KIF23	Kinesin Family Member 23
BAMBI	BMP And Activin Membrane Bound Inhibitor
FGA	Fibrinogen Alpha Chain
NCR3	Natural Cytotoxicity Triggering Receptor 3
PCNA	Proliferating Cell Nuclear Antigen
TRB	T Cell Receptor Beta Locus
LCOR	Ligand Dependent Nuclear Receptor Corepressor
TNFRSF8	TNF Receptor Superfamily Member 8
NOP56	NOP56 Ribonucleoprotein
ZFPM2	Zinc Finger Protein, FOG Family Member 2
RFWD3	Ring Finger And WD Repeat Domain 3
MAP2K7	Mitogen-Activated Protein Kinase Kinase 7
CBFA2T3	CBFA2/RUNX1 Partner Transcriptional Co-Repressor 3
KMT2E	Lysine Methyltransferase 2E (Inactive)
CSF2RA	Colony Stimulating Factor 2 Receptor Subunit Alpha
MIR423	MicroRNA 423
ZCCHC8	Zinc Finger CCHC-Type Containing 8
LYN	LYN Proto-Oncogene, Src Family Tyrosine Kinase
ABCB11	ATP Binding Cassette Subfamily B Member 11
FOXO1	Forkhead Box O1
RAD52	RAD52 Homolog, DNA Repair Protein
FLT4	Fms Related Receptor Tyrosine Kinase 4
BCL2L11	BCL2 Like 11
H4C11	H4 Clustered Histone 11
HP	Haptoglobin
MCM8	Minichromosome Maintenance 8 Homologous Recombination Repair Factor
AHSG	Alpha 2-HS Glycoprotein
SYNE1	Spectrin Repeat Containing Nuclear Envelope Protein 1
PCM1	Pericentriolar Material 1
MIR338	MicroRNA 338
EIF4EBP1	Eukaryotic Translation Initiation Factor 4E Binding Protein 1
HSD11B2	Hydroxysteroid 11-Beta Dehydrogenase 2
RUNX3	RUNX Family Transcription Factor 3
MIR16-1	MicroRNA 16-1
RTEL1-TNFRSF6B	RTEL1-TNFRSF6B Readthrough (NMD Candidate)
FADD	Fas Associated Via Death Domain
NGFR	Nerve Growth Factor Receptor
MIR199A1	MicroRNA 199a-1
SLAMF1	Signaling Lymphocytic Activation Molecule Family Member 1
ATP12A	ATPase H+/K+ Transporting Non-Gastric Alpha2 Subunit
ATP4A	ATPase H+/K+ Transporting Subunit Alpha
MLLT10	MLLT10 Histone Lysine Methyltransferase DOT1L Cofactor
NCOA2	Nuclear Receptor Coactivator 2
MIR330	MicroRNA 330
GDF15	Growth Differentiation Factor 15
HOTAIR	HOX Transcript Antisense RNA
HDAC2	Histone Deacetylase 2
RPL29	Ribosomal Protein L29
MUC16	Mucin 16, Cell Surface Associated
NKX2-1	NK2 Homeobox 1
KRT10	Keratin 10
SELP	Selectin P
CHUK	Component Of Inhibitor Of Nuclear Factor Kappa B Kinase Complex
ABCG2	ATP Binding Cassette Subfamily G Member 2 (Junior Blood Group)
FOXP1	Forkhead Box P1
IL5	Interleukin 5
DISP1	Dispatched RND Transporter Family Member 1
RAP1A	RAP1A, Member Of RAS Oncogene Family
CHIC2	Cysteine Rich Hydrophobic Domain 2
MAGEA4	MAGE Family Member A4
CDK1	Cyclin Dependent Kinase 1
HMGN1	High Mobility Group Nucleosome Binding Domain 1
CD86	CD86 Molecule
IL1RAPL2	Interleukin 1 Receptor Accessory Protein Like 2
TKT	Transketolase
MIR424	MicroRNA 424
NPPB	Natriuretic Peptide B
LCAT	Lecithin-Cholesterol Acyltransferase
CCL5	C-C Motif Chemokine Ligand 5
USP16	Ubiquitin Specific Peptidase 16
PARK7	Parkinsonism Associated Deglycase
TRIP13	Thyroid Hormone Receptor Interactor 13
CASP9	Caspase 9
LCK	LCK Proto-Oncogene, Src Family Tyrosine Kinase
ALDH1A1	Aldehyde Dehydrogenase 1 Family Member A1
LOC110806263	TERT 5' Regulatory Region
CD7	CD7 Molecule
MVP	Major Vault Protein
TYK2	Tyrosine Kinase 2
FUT4	Fucosyltransferase 4
CDKN2B-AS1	CDKN2B Antisense RNA 1
RUNX1T1	RUNX1 Partner Transcriptional Co-Repressor 1
RPS4X	Ribosomal Protein S4 X-Linked
LIF	LIF Interleukin 6 Family Cytokine
GAR1	GAR1 Ribonucleoprotein
CD2	CD2 Molecule
CDKN2C	Cyclin Dependent Kinase Inhibitor 2C
SH3GL1	SH3 Domain Containing GRB2 Like 1, Endophilin A2
DLL1	Delta Like Canonical Notch Ligand 1
LEPQTL1	Leptin, Serum Levels Of
CCNA2	Cyclin A2
CRKL	CRK Like Proto-Oncogene, Adaptor Protein
BCL2L1	BCL2 Like 1
PRIMPOL	Primase And DNA Directed Polymerase
ORC4	Origin Recognition Complex Subunit 4
FCER2	Fc Fragment Of IgE Receptor II
H4C3	H4 Clustered Histone 3
INPP5D	Inositol Polyphosphate-5-Phosphatase D
EPHX1	Epoxide Hydrolase 1
LSR	Lipolysis Stimulated Lipoprotein Receptor
CAMP	Cathelicidin Antimicrobial Peptide
MDC1	Mediator Of DNA Damage Checkpoint 1
FGR	FGR Proto-Oncogene, Src Family Tyrosine Kinase
MCM10	Minichromosome Maintenance 10 Replication Initiation Factor
ETS1	ETS Proto-Oncogene 1, Transcription Factor
OGG1	8-Oxoguanine DNA Glycosylase
MIR151A	MicroRNA 151a
LAMP2	Lysosomal Associated Membrane Protein 2
PSMA7	Proteasome 20S Subunit Alpha 7
MSN	Moesin
PIF1	PIF1 5'-To-3' DNA Helicase
CCDC26	CCDC26 Long Non-Coding RNA
H4C14	H4 Clustered Histone 14
H4C12	H4 Clustered Histone 12
KLRD1	Killer Cell Lectin Like Receptor D1
CXCL10	C-X-C Motif Chemokine Ligand 10
ACHE	Acetylcholinesterase (Cartwright Blood Group)
H4C2	H4 Clustered Histone 2
H4C6	H4 Clustered Histone 6
H4C4	H4 Clustered Histone 4
H4C5	H4 Clustered Histone 5
GATD3A	Glutamine Amidotransferase Like Class 1 Domain Containing 3A
ARFRP1	ADP Ribosylation Factor Related Protein 1
IRS2	Insulin Receptor Substrate 2
RAD17	RAD17 Checkpoint Clamp Loader Component
RAD51B	RAD51 Paralog B
SPINT2	Serine Peptidase Inhibitor, Kunitz Type 2
CD5	CD5 Molecule
PIM1	Pim-1 Proto-Oncogene, Serine/Threonine Kinase
IL9	Interleukin 9
HMGA2	High Mobility Group AT-Hook 2
ID2	Inhibitor Of DNA Binding 2
HBA2	Hemoglobin Subunit Alpha 2
CASP1	Caspase 1
FHL2	Four And A Half LIM Domains 2
MAP3K7	Mitogen-Activated Protein Kinase Kinase Kinase 7
PFAS	Phosphoribosylformylglycinamidine Synthase
STAG3	Stromal Antigen 3
SELL	Selectin L
BCAP31	B Cell Receptor Associated Protein 31
YWHAE	Tyrosine 3-Monooxygenase/Tryptophan 5-Monooxygenase Activation Protein Epsilon
PLK1	Polo Like Kinase 1
IL2RB	Interleukin 2 Receptor Subunit Beta
SELE	Selectin E
NOX4	NADPH Oxidase 4
MUC2	Mucin 2, Oligomeric Mucus/Gel-Forming
MUC19	Mucin 19, Oligomeric
CYP2C19	Cytochrome P450 Family 2 Subfamily C Member 19
KLRC1	Killer Cell Lectin Like Receptor C1
TUG1	Taurine Up-Regulated 1
MRTO4	MRT4 Homolog, Ribosome Maturation Factor
NOS2	Nitric Oxide Synthase 2
HMOX1	Heme Oxygenase 1
SNAI1	Snail Family Transcriptional Repressor 1
HSPB1	Heat Shock Protein Family B (Small) Member 1
E2F2	E2F Transcription Factor 2
VAV1	Vav Guanine Nucleotide Exchange Factor 1
POLA1	DNA Polymerase Alpha 1, Catalytic Subunit
RPS3	Ribosomal Protein S3
BHLHE40	Basic Helix-Loop-Helix Family Member E40
CD22	CD22 Molecule
CDCA5	Cell Division Cycle Associated 5
VEGFC	Vascular Endothelial Growth Factor C
NOL11	Nucleolar Protein 11
MIR486-1	MicroRNA 486-1
KLHL3	Kelch Like Family Member 3
H3-3A	H3.3 Histone A
MIR130A	MicroRNA 130a
C5	Complement C5
KIR2DL1	Killer Cell Immunoglobulin Like Receptor, Two Ig Domains And Long Cytoplasmic Tail 1
KIFC2	Kinesin Family Member C2
MAPRE3	Microtubule Associated Protein RP/EB Family Member 3
PGK1	Phosphoglycerate Kinase 1
BRD4	Bromodomain Containing 4
SCARNA23	Small Cajal Body-Specific RNA 23
AKAP12	A-Kinase Anchoring Protein 12
NLRP1	NLR Family Pyrin Domain Containing 1
LTF	Lactotransferrin
THBS1	Thrombospondin 1
HSPD1	Heat Shock Protein Family D (Hsp60) Member 1
POGLUT1	Protein O-Glucosyltransferase 1
CHGA	Chromogranin A
ALDH2	Aldehyde Dehydrogenase 2 Family Member
TP73	Tumor Protein P73
ITGB2	Integrin Subunit Beta 2
TCHP	Trichoplein Keratin Filament Binding
SSBP1	Single Stranded DNA Binding Protein 1
TSPAN7	Tetraspanin 7
MIR20A	MicroRNA 20a
CD47	CD47 Molecule
SPECC1	Sperm Antigen With Calponin Homology And Coiled-Coil Domains 1
CMA1	Chymase 1
LOC107197952	NUP98-HOXA9 Recombination Region
UCA1	Urothelial Cancer Associated 1
VCL	Vinculin
PMAIP1	Phorbol-12-Myristate-13-Acetate-Induced Protein 1
PLEK	Pleckstrin
CPN1	Carboxypeptidase N Subunit 1
MIR27B	MicroRNA 27b
FOXO3	Forkhead Box O3
CD52	CD52 Molecule
TEK	TEK Receptor Tyrosine Kinase
BUB1	BUB1 Mitotic Checkpoint Serine/Threonine Kinase
RPF1	Ribosome Production Factor 1 Homolog
RNU6ATAC	RNA, U6atac Small Nuclear (U12-Dependent Splicing)
TPMT	Thiopurine S-Methyltransferase
SLPI	Secretory Leukocyte Peptidase Inhibitor
SCD	Stearoyl-CoA Desaturase
KDM5A	Lysine Demethylase 5A
SMARCD2	SWI/SNF Related, Matrix Associated, Actin Dependent Regulator Of Chromatin, Subfamily D, Member 2
TGFA	Transforming Growth Factor Alpha
PTGS2	Prostaglandin-Endoperoxide Synthase 2
TEN1	TEN1 Subunit Of CST Complex
SETMAR	SET Domain And Mariner Transposase Fusion Gene
MCM2	Minichromosome Maintenance Complex Component 2
RPS5	Ribosomal Protein S5
TIMP1	TIMP Metallopeptidase Inhibitor 1
CPT2	Carnitine Palmitoyltransferase 2
SNU13	Small Nuclear Ribonucleoprotein 13
LEXM	Lymphocyte Expansion Molecule
EWSR1	EWS RNA Binding Protein 1
MIR212	MicroRNA 212
HIP1	Huntingtin Interacting Protein 1
WNT1	Wnt Family Member 1
CYP2E1	Cytochrome P450 Family 2 Subfamily E Member 1
PIK3CG	Phosphatidylinositol-4,5-Bisphosphate 3-Kinase Catalytic Subunit Gamma
MIR10B	MicroRNA 10b
TAL1	TAL BHLH Transcription Factor 1, Erythroid Differentiation Factor
GMPS	Guanine Monophosphate Synthase
CLPTM1L	CLPTM1 Like
MAGEA1	MAGE Family Member A1
PRAME	PRAME Nuclear Receptor Transcriptional Regulator
ZNF23	Zinc Finger Protein 23
RPS15	Ribosomal Protein S15
XPO1	Exportin 1
TXN	Thioredoxin
CCAT1	Colon Cancer Associated Transcript 1
ZMYND10	Zinc Finger MYND-Type Containing 10
FIBP	FGF1 Intracellular Binding Protein
MIR455	MicroRNA 455
VTI1B	Vesicle Transport Through Interaction With T-SNAREs 1B
PNPLA5	Patatin Like Phospholipase Domain Containing 5
ALPP	Alkaline Phosphatase, Placental
LIG1	DNA Ligase 1
MPG	N-Methylpurine DNA Glycosylase
MATK	Megakaryocyte-Associated Tyrosine Kinase
NCL	Nucleolin
DIPK1A	Divergent Protein Kinase Domain 1A
MAGEA3	MAGE Family Member A3
ITGAL	Integrin Subunit Alpha L
MMP1	Matrix Metallopeptidase 1
ILDR1	Immunoglobulin Like Domain Containing Receptor 1
LGALS4	Galectin 4
POLI	DNA Polymerase Iota
DAXX	Death Domain Associated Protein
PRDM8	PR/SET Domain 8
CD3D	CD3d Molecule
NAGS	N-Acetylglutamate Synthase
RPL10A	Ribosomal Protein L10a
HINT1	Histidine Triad Nucleotide Binding Protein 1
CD63	CD63 Molecule
LMO2	LIM Domain Only 2
LOC110806306	Telomerase RNA Component (TERC) Promoter
ROS1	ROS Proto-Oncogene 1, Receptor Tyrosine Kinase
LOC107126288	NUP98-HOXA13 Recombination Region
NAF1	Nuclear Assembly Factor 1 Ribonucleoprotein
RPL27A	Ribosomal Protein L27a
MBD4	Methyl-CpG Binding Domain 4, DNA Glycosylase
CDAN3	Congenital Dyserythropoietic Anemia, Type III
RPL13A	Ribosomal Protein L13a
S100A9	S100 Calcium Binding Protein A9
UNC13B	Unc-13 Homolog B
STX3	Syntaxin 3
KCNN4	Potassium Calcium-Activated Channel Subfamily N Member 4
CD24	CD24 Molecule
BAALC	BAALC Binder Of MAP3K1 And KLF4
MIR6797	MicroRNA 6797
IL32	Interleukin 32
NOP58	NOP58 Ribonucleoprotein
MIR154	MicroRNA 154
GAB2	GRB2 Associated Binding Protein 2
CARTPT	CART Prepropeptide
SHQ1	SHQ1, H/ACA Ribonucleoprotein Assembly Factor
FADS2	Fatty Acid Desaturase 2
RMND5B	Required For Meiotic Nuclear Division 5 Homolog B
NCR1	Natural Cytotoxicity Triggering Receptor 1
ITGB1	Integrin Subunit Beta 1
RBM19	RNA Binding Motif Protein 19
KDM3B	Lysine Demethylase 3B
NFATC2	Nuclear Factor Of Activated T Cells 2
TRUB1	TruB Pseudouridine Synthase Family Member 1
SCARNA13	Small Cajal Body-Specific RNA 13
SNORA64	Small Nucleolar RNA, H/ACA Box 64
TRIB2	Tribbles Pseudokinase 2
TSR1	TSR1 Ribosome Maturation Factor
RPS18	Ribosomal Protein S18
H2AC13	H2A Clustered Histone 13
HMGB1	High Mobility Group Box 1
RPS11	Ribosomal Protein S11
MUC13	Mucin 13, Cell Surface Associated
RAD9A	RAD9 Checkpoint Clamp Component A
TUT1	Terminal Uridylyl Transferase 1, U6 SnRNA-Specific
P2RY12	Purinergic Receptor P2Y12
MIR574	MicroRNA 574
BRD2	Bromodomain Containing 2
G6PD	Glucose-6-Phosphate Dehydrogenase
MUC17	Mucin 17, Cell Surface Associated
RUVBL2	RuvB Like AAA ATPase 2
MIF	Macrophage Migration Inhibitory Factor
LOC107126281	NUP98-HOXA11 Recombination Region
IDO1	Indoleamine 2,3-Dioxygenase 1
CBLB	Cbl Proto-Oncogene B
MIR143	MicroRNA 143
IFNB1	Interferon Beta 1
SOD2	Superoxide Dismutase 2
TNFRSF9	TNF Receptor Superfamily Member 9
MAGEA9	MAGE Family Member A9
RPS2	Ribosomal Protein S2
MUC12	Mucin 12, Cell Surface Associated
FCGR1A	Fc Fragment Of IgG Receptor Ia
UIMC1	Ubiquitin Interaction Motif Containing 1
RYK	Receptor Like Tyrosine Kinase
MIR193A	MicroRNA 193a
KRT13	Keratin 13
WT1-AS	WT1 Antisense RNA
MFF	Mitochondrial Fission Factor
RASA4	RAS P21 Protein Activator 4
EPHB4	EPH Receptor B4
MAGEA11	MAGE Family Member A11
IRF2	Interferon Regulatory Factor 2
MIRLET7E	MicroRNA Let-7e
MBOAT2	Membrane Bound O-Acyltransferase Domain Containing 2
CPT1A	Carnitine Palmitoyltransferase 1A
NACA	Nascent Polypeptide Associated Complex Subunit Alpha
STUB1	STIP1 Homology And U-Box Containing Protein 1
CD247	CD247 Molecule
PTBP3	Polypyrimidine Tract Binding Protein 3
GSK3B	Glycogen Synthase Kinase 3 Beta
CCND3	Cyclin D3
CX3CR1	C-X3-C Motif Chemokine Receptor 1
MAGEA6	MAGE Family Member A6
PF4	Platelet Factor 4
PLK4	Polo Like Kinase 4
E2F1	E2F Transcription Factor 1
LOC107303338	3p25 FANCD2 Alu-Mediated Recombination Region
ANGPT2	Angiopoietin 2
AFDN	Afadin, Adherens Junction Formation Factor
RAP1B	RAP1B, Member Of RAS Oncogene Family
GP6	Glycoprotein VI Platelet
CBFA2T2	CBFA2/RUNX1 Partner Transcriptional Co-Repressor 2
TGIF1	TGFB Induced Factor Homeobox 1
EME1	Essential Meiotic Structure-Specific Endonuclease 1
COIL	Coilin
SIPA1	Signal-Induced Proliferation-Associated 1
RPA2	Replication Protein A2
FXN	Frataxin
BYSL	Bystin Like
KIR2DL3	Killer Cell Immunoglobulin Like Receptor, Two Ig Domains And Long Cytoplasmic Tail 3
MIR302D	MicroRNA 302d
PYCARD	PYD And CARD Domain Containing
MAGEA10	MAGE Family Member A10
ACTRT3	Actin Related Protein T3
MAGEA8	MAGE Family Member A8
MAGEA2	MAGE Family Member A2
MAGEA2B	MAGE Family Member A2B
MAGEA5	MAGE Family Member A5
MCM6	Minichromosome Maintenance Complex Component 6
MSH4	MutS Homolog 4
CD14	CD14 Molecule
LDLR	Low Density Lipoprotein Receptor
BRCC3	BRCA1/BRCA2-Containing Complex Subunit 3
IQCG	IQ Motif Containing G
PCSK9	Proprotein Convertase Subtilisin/Kexin Type 9
MIR367	MicroRNA 367
SUN1	Sad1 And UNC84 Domain Containing 1
PAK1IP1	PAK1 Interacting Protein 1
BCHE	Butyrylcholinesterase
CISH	Cytokine Inducible SH2 Containing Protein
TRUB2	TruB Pseudouridine Synthase Family Member 2
TENT4B	Terminal Nucleotidyltransferase 4B
SCARNA8	Small Cajal Body-Specific RNA 8
TRI-AAT4-1	TRNA-Ile (Anticodon AAT) 4-1
TRT-AGT1-2	TRNA-Thr (Anticodon AGT) 1-2
TRS-AGA2-6	TRNA-Ser (Anticodon AGA) 2-6
CD48	CD48 Molecule
MIR128-2	MicroRNA 128-2
MUC15	Mucin 15, Cell Surface Associated
PARP2	Poly(ADP-Ribose) Polymerase 2
RBFOX1	RNA Binding Fox-1 Homolog 1
RPN2	Ribophorin II
FGF1	Fibroblast Growth Factor 1
MIR130B	MicroRNA 130b
RPLP1	Ribosomal Protein Lateral Stalk Subunit P1
RHD	Rh Blood Group D Antigen
RPL28	Ribosomal Protein L28
GRID1	Glutamate Ionotropic Receptor Delta Type Subunit 1
FAAP24	FA Core Complex Associated Protein 24
DLX4	Distal-Less Homeobox 4
TNFSF11	TNF Superfamily Member 11
RPL37	Ribosomal Protein L37
TUSC7	Tumor Suppressor Candidate 7
CD3G	CD3g Molecule
MMUT	Methylmalonyl-CoA Mutase
RNF8	Ring Finger Protein 8
IL6R	Interleukin 6 Receptor
DGAT1	Diacylglycerol O-Acyltransferase 1
RBM15	RNA Binding Motif Protein 15
PNO1	Partner Of NOB1 Homolog
ARHGEF1	Rho Guanine Nucleotide Exchange Factor 1
TOPBP1	DNA Topoisomerase II Binding Protein 1
HOXA10	Homeobox A10
CA1	Carbonic Anhydrase 1
TTF2	Transcription Termination Factor 2
RPS13	Ribosomal Protein S13
RPL7	Ribosomal Protein L7
BUB3	BUB3 Mitotic Checkpoint Protein
SLC22A5	Solute Carrier Family 22 Member 5
DEK	DEK Proto-Oncogene
RPL19	Ribosomal Protein L19
HEATR1	HEAT Repeat Containing 1
SLC66A1	Solute Carrier Family 66 Member 1
SMAD2	SMAD Family Member 2
AFF1	AF4/FMR2 Family Member 1
DDB1	Damage Specific DNA Binding Protein 1
CHI3L1	Chitinase 3 Like 1
HBB-LCR	Beta-Globin Locus Control Region
TRIP11	Thyroid Hormone Receptor Interactor 11
IRAIN	IGF1R Antisense Imprinted Non-Protein Coding RNA
CENPS	Centromere Protein S
ITGA2	Integrin Subunit Alpha 2
LYZ	Lysozyme
PERM1	PPARGC1 And ESRR Induced Regulator, Muscle 1
STK4	Serine/Threonine Kinase 4
RPS9	Ribosomal Protein S9
TEC	Tec Protein Tyrosine Kinase
BBC3	BCL2 Binding Component 3
PKM	Pyruvate Kinase M1/2
ECI2	Enoyl-CoA Delta Isomerase 2
MDM4	MDM4 Regulator Of P53
FZD9	Frizzled Class Receptor 9
NFKB2	Nuclear Factor Kappa B Subunit 2
VRK2	VRK Serine/Threonine Kinase 2
MIR28	MicroRNA 28
SNORD63	Small Nucleolar RNA, C/D Box 63
CYBB	Cytochrome B-245 Beta Chain
RPL7A	Ribosomal Protein L7a
CLSPN	Claspin
FERMT3	Fermitin Family Member 3
MIR744	MicroRNA 744
HLTF	Helicase Like Transcription Factor
RPS8	Ribosomal Protein S8
ANG	Angiogenin
MRGPRX2	MAS Related GPR Family Member X2
MIR219A1	MicroRNA 219a-1
FER	FER Tyrosine Kinase
SNAP23	Synaptosome Associated Protein 23
PPBP	Pro-Platelet Basic Protein
TJP1	Tight Junction Protein 1
CLEC10A	C-Type Lectin Domain Containing 10A
CDK9	Cyclin Dependent Kinase 9
DROSHA	Drosha Ribonuclease III
MIR374A	MicroRNA 374a
HOXA11	Homeobox A11
S100A8	S100 Calcium Binding Protein A8
BIRC3	Baculoviral IAP Repeat Containing 3
RPL12	Ribosomal Protein L12
RPL9	Ribosomal Protein L9
RPL23A	Ribosomal Protein L23a
RPL14	Ribosomal Protein L14
MIR331	MicroRNA 331
MIR590	MicroRNA 590
RPL4	Ribosomal Protein L4
RPL30	Ribosomal Protein L30
TNFRSF10C	TNF Receptor Superfamily Member 10c
EVPL	Envoplakin
MIR147A	MicroRNA 147a
YBX2	Y-Box Binding Protein 2
ATAD5	ATPase Family AAA Domain Containing 5
RPS16	Ribosomal Protein S16
MRPL36	Mitochondrial Ribosomal Protein L36
NCOR2	Nuclear Receptor Corepressor 2
PECAM1	Platelet And Endothelial Cell Adhesion Molecule 1
NSF	N-Ethylmaleimide Sensitive Factor, Vesicle Fusing ATPase
NOB1	NIN1 (RPN12) Binding Protein 1 Homolog
RBX1	Ring-Box 1
NKIRAS1	NFKB Inhibitor Interacting Ras Like 1
RPS10-NUDT3	RPS10-NUDT3 Readthrough
RPL3L	Ribosomal Protein L3 Like
TYMS	Thymidylate Synthetase
RPL36	Ribosomal Protein L36
HSPA5	Heat Shock Protein Family A (Hsp70) Member 5
YBX1	Y-Box Binding Protein 1
FPR1	Formyl Peptide Receptor 1
BOP1	BOP1 Ribosomal Biogenesis Factor
RPL36A	Ribosomal Protein L36a
BCL2L2	BCL2 Like 2
IFI27	Interferon Alpha Inducible Protein 27
LEMD2	LEM Domain Nuclear Envelope Protein 2
CSDE1	Cold Shock Domain Containing E1
LTV1	LTV1 Ribosome Biogenesis Factor
POLL	DNA Polymerase Lambda
RIOK2	RIO Kinase 2
RPS27L	Ribosomal Protein S27 Like
DIMT1	DIMT1 RRNA Methyltransferase And Ribosome Maturation Factor
MIR542	MicroRNA 542
FMN1	Formin 1
EME2	Essential Meiotic Structure-Specific Endonuclease Subunit 2
RPL36AL	Ribosomal Protein L36a Like
RPL22L1	Ribosomal Protein L22 Like 1
RPL39	Ribosomal Protein L39
SMIM3	Small Integral Membrane Protein 3
HOTAIRM1	HOXA Transcript Antisense RNA, Myeloid-Specific 1
SNORA66	Small Nucleolar RNA, H/ACA Box 66
RPS19P2	Ribosomal Protein S19 Pseudogene 2
RPS19P1	Ribosomal Protein S19 Pseudogene 1
CSRP1	Cysteine And Glycine Rich Protein 1
CD244	CD244 Molecule
GNPTAB	N-Acetylglucosamine-1-Phosphate Transferase Subunits Alpha And Beta
MMP8	Matrix Metallopeptidase 8
RAD18	RAD18 E3 Ubiquitin Protein Ligase
HUS1	HUS1 Checkpoint Clamp Component
MDH2	Malate Dehydrogenase 2
POLR2A	RNA Polymerase II Subunit A
SPO11	SPO11 Initiator Of Meiotic Double Stranded Breaks
AMACR	Alpha-Methylacyl-CoA Racemase
LAT	Linker For Activation Of T Cells
MIR205	MicroRNA 205
ABCG8	ATP Binding Cassette Subfamily G Member 8
MKI67	Marker Of Proliferation Ki-67
YWHAQ	Tyrosine 3-Monooxygenase/Tryptophan 5-Monooxygenase Activation Protein Theta
SLAMF6	SLAM Family Member 6
PRKAA1	Protein Kinase AMP-Activated Catalytic Subunit Alpha 1
LYL1	LYL1 Basic Helix-Loop-Helix Family Member
KLRC2	Killer Cell Lectin Like Receptor C2
DDIT3	DNA Damage Inducible Transcript 3
USP1	Ubiquitin Specific Peptidase 1
MIR30C1	MicroRNA 30c-1
CYP2B6	Cytochrome P450 Family 2 Subfamily B Member 6
IKBKB	Inhibitor Of Nuclear Factor Kappa B Kinase Subunit Beta
CDAN1	Codanin 1
ROBO1	Roundabout Guidance Receptor 1
CXCR1	C-X-C Motif Chemokine Receptor 1
MIR628	MicroRNA 628
MLLT1	MLLT1 Super Elongation Complex Subunit
WDR48	WD Repeat Domain 48
MLLT3	MLLT3 Super Elongation Complex Subunit
POLD3	DNA Polymerase Delta 3, Accessory Subunit
SLX1B	SLX1 Homolog B, Structure-Specific Endonuclease Subunit
SLX1A	SLX1 Homolog A, Structure-Specific Endonuclease Subunit
SGCD	Sarcoglycan Delta
HOXA5	Homeobox A5
POSTN	Periostin
FYN	FYN Proto-Oncogene, Src Family Tyrosine Kinase
CYP3A5	Cytochrome P450 Family 3 Subfamily A Member 5
PTPN6	Protein Tyrosine Phosphatase Non-Receptor Type 6
PRKCA	Protein Kinase C Alpha
MIR325	MicroRNA 325
SPAG6	Sperm Associated Antigen 6
TUBB	Tubulin Beta Class I
DOCK4	Dedicator Of Cytokinesis 4
MIR615	MicroRNA 615
DUSP13	Dual Specificity Phosphatase 13
MIR339	MicroRNA 339
EMSY	EMSY Transcriptional Repressor, BRCA2 Interacting
HLA-G	Major Histocompatibility Complex, Class I, G
TFR2	Transferrin Receptor 2
ILK	Integrin Linked Kinase
CDIN1	CDAN1 Interacting Nuclease 1
HES1	Hes Family BHLH Transcription Factor 1
NCR2	Natural Cytotoxicity Triggering Receptor 2
BRDT	Bromodomain Testis Associated
BRD3	Bromodomain Containing 3
CD1A	CD1a Molecule
HNRNPA1	Heterogeneous Nuclear Ribonucleoprotein A1
HOXA7	Homeobox A7
NRP1	Neuropilin 1
RABEP1	Rabaptin, RAB GTPase Binding Effector Protein 1
GDF11	Growth Differentiation Factor 11
REV1	REV1 DNA Directed Polymerase
EYA2	EYA Transcriptional Coactivator And Phosphatase 2
METTL3	Methyltransferase Like 3
MIR582	MicroRNA 582
TTLL3	Tubulin Tyrosine Ligase Like 3
HPSE	Heparanase
RANBP2	RAN Binding Protein 2
GALNT2	Polypeptide N-Acetylgalactosaminyltransferase 2
CDH5	Cadherin 5
BSG	Basigin (Ok Blood Group)
UBE2D2	Ubiquitin Conjugating Enzyme E2 D2
ZMYM2	Zinc Finger MYM-Type Containing 2
FOXM1	Forkhead Box M1
CTRL	Chymotrypsin Like
DHX34	DExH-Box Helicase 34
SUMO1	Small Ubiquitin Like Modifier 1
ADAM8	ADAM Metallopeptidase Domain 8
YWHAB	Tyrosine 3-Monooxygenase/Tryptophan 5-Monooxygenase Activation Protein Beta
POLN	DNA Polymerase Nu
UQCRFS1	Ubiquinol-Cytochrome C Reductase, Rieske Iron-Sulfur Polypeptide 1
MIR372	MicroRNA 372
ROBO2	Roundabout Guidance Receptor 2
PTK2	Protein Tyrosine Kinase 2
RPS6KA1	Ribosomal Protein S6 Kinase A1
KIR2DS4	Killer Cell Immunoglobulin Like Receptor, Two Ig Domains And Short Cytoplasmic Tail 4
POLQ	DNA Polymerase Theta
SSTR2	Somatostatin Receptor 2
CABIN1	Calcineurin Binding Protein 1
TENT4A	Terminal Nucleotidyltransferase 4A
MIR124-1	MicroRNA 124-1
MIR340	MicroRNA 340
OGT	O-Linked N-Acetylglucosamine (GlcNAc) Transferase
STX18	Syntaxin 18
MICB	MHC Class I Polypeptide-Related Sequence B
KDM2B	Lysine Demethylase 2B
CEP70	Centrosomal Protein 70
DOT1L	DOT1 Like Histone Lysine Methyltransferase
PNP	Purine Nucleoside Phosphorylase
ANXA7	Annexin A7
CUX1	Cut Like Homeobox 1
USF2	Upstream Transcription Factor 2, C-Fos Interacting
ANXA8	Annexin A8
CXCR2	C-X-C Motif Chemokine Receptor 2
RAN	RAN, Member RAS Oncogene Family
ELL	Elongation Factor For RNA Polymerase II
PRAM1	PML-RARA Regulated Adaptor Molecule 1
MIR223HG	MIR223 Host Gene
ENSG00000287119
CBX4	Chromobox 4
RASSF1	Ras Association Domain Family Member 1
SNX6	Sorting Nexin 6
DCLRE1A	DNA Cross-Link Repair 1A
ATG5	Autophagy Related 5
MIRLET7A3	MicroRNA Let-7a-3
SPIRE2	Spire Type Actin Nucleation Factor 2
NR4A2	Nuclear Receptor Subfamily 4 Group A Member 2
NR0B2	Nuclear Receptor Subfamily 0 Group B Member 2
H2BC21	H2B Clustered Histone 21
GYPB	Glycophorin B (MNS Blood Group)
SRF	Serum Response Factor
TLR8	Toll Like Receptor 8
CUL4A	Cullin 4A
TCF7	Transcription Factor 7
H2AC16	H2A Clustered Histone 16
H2AC17	H2A Clustered Histone 17
H2AC8	H2A Clustered Histone 8
FOLR1	Folate Receptor Alpha
TDRG1	Testis Development Related 1
BECN1	Beclin 1
LRRTM2	Leucine Rich Repeat Transmembrane Neuronal 2
CDC25C	Cell Division Cycle 25C
DGKG	Diacylglycerol Kinase Gamma
CASP5	Caspase 5
VAMP4	Vesicle Associated Membrane Protein 4
FAAP100	FA Core Complex Associated Protein 100
RALY	RALY Heterogeneous Nuclear Ribonucleoprotein
XBP1	X-Box Binding Protein 1
PSPC1	Paraspeckle Component 1
BNC2	Basonuclin 2
TEX14	Testis Expressed 14, Intercellular Bridge Forming Factor
MATR3	Matrin 3
HLA-DRB4	Major Histocompatibility Complex, Class II, DR Beta 4
HELQ	Helicase, POLQ Like
IMMTP1	Inner Membrane Mitochondrial Protein Pseudogene 1
GTPBP10	GTP Binding Protein 10
CRAT	Carnitine O-Acetyltransferase
TRAF6	TNF Receptor Associated Factor 6
ZBTB32	Zinc Finger And BTB Domain Containing 32
FAAP20	FA Core Complex Associated Protein 20
GINS1	GINS Complex Subunit 1
RNU6-1	RNA, U6 Small Nuclear 1
APIP	APAF1 Interacting Protein
SPATA33	Spermatogenesis Associated 33
A2M	Alpha-2-Macroglobulin
MIR196B	MicroRNA 196b
SNX5	Sorting Nexin 5
CLK4	CDC Like Kinase 4
HORMAD1	HORMA Domain Containing 1
MOSPD2	Motile Sperm Domain Containing 2
RAD51AP1	RAD51 Associated Protein 1
ZNF276	Zinc Finger Protein 276
DEF8	Differentially Expressed In FDCP 8 Homolog
MTMR11	Myotubularin Related Protein 11
TMEM45A	Transmembrane Protein 45A
C12orf54	Chromosome 12 Open Reading Frame 54
FBH1	F-Box DNA Helicase 1
FANCD2OS	FANCD2 Opposite Strand
LOC112486223	Sharpr-MPRA Regulatory Region 3988
ARG1	Arginase 1
SOX7	SRY-Box Transcription Factor 7
STING1	Stimulator Of Interferon Response CGAMP Interactor 1
MIR125B1	MicroRNA 125b-1
KLF11	Kruppel Like Factor 11
GART	Phosphoribosylglycinamide Formyltransferase, Phosphoribosylglycinamide Synthetase, Phosphoribosylaminoimidazole Synthetase
MIR99A	MicroRNA 99a
DNASE1	Deoxyribonuclease 1
LDLRAP1	Low Density Lipoprotein Receptor Adaptor Protein 1
STAP1	Signal Transducing Adaptor Family Member 1
EFNA5	Ephrin A5
ATOX1	Antioxidant 1 Copper Chaperone
JARID2	Jumonji And AT-Rich Interaction Domain Containing 2
SRRT	Serrate, RNA Effector Molecule
RECK	Reversion Inducing Cysteine Rich Protein With Kazal Motifs
PTS	6-Pyruvoyltetrahydropterin Synthase
TRAF2	TNF Receptor Associated Factor 2
PRPF19	Pre-MRNA Processing Factor 19
TM7SF2	Transmembrane 7 Superfamily Member 2
DUSP1	Dual Specificity Phosphatase 1
MLKL	Mixed Lineage Kinase Domain Like Pseudokinase
ALAS2	5'-Aminolevulinate Synthase 2
PLA2G4A	Phospholipase A2 Group IVA
PLRG1	Pleiotropic Regulator 1
MYL9	Myosin Light Chain 9
CDC5L	Cell Division Cycle 5 Like
NUP88	Nucleoporin 88
PFN1	Profilin 1
SLC11A2	Solute Carrier Family 11 Member 2
GYS1	Glycogen Synthase 1
PIEZO1	Piezo Type Mechanosensitive Ion Channel Component 1
CCN1	Cellular Communication Network Factor 1
PLAGL2	PLAG1 Like Zinc Finger 2
AKAP8L	A-Kinase Anchoring Protein 8 Like
PLBD2	Phospholipase B Domain Containing 2
SMAD7	SMAD Family Member 7
RNU5A-1	RNA, U5A Small Nuclear 1
ID1	Inhibitor Of DNA Binding 1, HLH Protein
PRDM2	PR/SET Domain 2
NT5C2	5'-Nucleotidase, Cytosolic II
KIR3DL2	Killer Cell Immunoglobulin Like Receptor, Three Ig Domains And Long Cytoplasmic Tail 2
CCNC	Cyclin C
MRPL46	Mitochondrial Ribosomal Protein L46
STMN1	Stathmin 1
MAD2L1	Mitotic Arrest Deficient 2 Like 1
MST1R	Macrophage Stimulating 1 Receptor
EHMT2	Euchromatic Histone Lysine Methyltransferase 2
GAS2L3	Growth Arrest Specific 2 Like 3
AMBP	Alpha-1-Microglobulin/Bikunin Precursor
PDLIM5	PDZ And LIM Domain 5
CCNA1	Cyclin A1
ZMYND11	Zinc Finger MYND-Type Containing 11
IRAK4	Interleukin 1 Receptor Associated Kinase 4
CREBL2	CAMP Responsive Element Binding Protein Like 2
IL18R1	Interleukin 18 Receptor 1
ERN1	Endoplasmic Reticulum To Nucleus Signaling 1
HLA-E	Major Histocompatibility Complex, Class I, E
CX3CL1	C-X3-C Motif Chemokine Ligand 1
CD3E	CD3e Molecule
GJA4	Gap Junction Protein Alpha 4
CASP2	Caspase 2
GPX3	Glutathione Peroxidase 3
TRIM22	Tripartite Motif Containing 22
MYOT	Myotilin
SOX17	SRY-Box Transcription Factor 17
IRF4	Interferon Regulatory Factor 4
RING1	Ring Finger Protein 1
UBE2D1	Ubiquitin Conjugating Enzyme E2 D1
TRIM33	Tripartite Motif Containing 33
VAMP8	Vesicle Associated Membrane Protein 8
KTN1	Kinectin 1
PRPF40B	Pre-MRNA Processing Factor 40 Homolog B
ETV1	ETS Variant Transcription Factor 1
AZGP1	Alpha-2-Glycoprotein 1, Zinc-Binding
NAIP	NLR Family Apoptosis Inhibitory Protein
ARRB1	Arrestin Beta 1
SLC22A2	Solute Carrier Family 22 Member 2
ERG	ETS Transcription Factor ERG
TIE1	Tyrosine Kinase With Immunoglobulin Like And EGF Like Domains 1
PRND	Prion Like Protein Doppel
SLIT1	Slit Guidance Ligand 1
STXBP3	Syntaxin Binding Protein 3
RPL23	Ribosomal Protein L23
PSIP1	PC4 And SFRS1 Interacting Protein 1
MAD1L1	Mitotic Arrest Deficient 1 Like 1
NR4A1	Nuclear Receptor Subfamily 4 Group A Member 1
ETV7	ETS Variant Transcription Factor 7
UHMK1	U2AF Homology Motif Kinase 1
IFNAR2	Interferon Alpha And Beta Receptor Subunit 2
RNF2	Ring Finger Protein 2
TNIP1	TNFAIP3 Interacting Protein 1
CSNK1A1	Casein Kinase 1 Alpha 1
NME1	NME/NM23 Nucleoside Diphosphate Kinase 1
CDC20	Cell Division Cycle 20
MIR671	MicroRNA 671
GAB1	GRB2 Associated Binding Protein 1
HSPA8	Heat Shock Protein Family A (Hsp70) Member 8
TIFAB	TIFA Inhibitor
PIAS4	Protein Inhibitor Of Activated STAT 4
TNKS	Tankyrase
PRRX1	Paired Related Homeobox 1
SEPTIN9	Septin 9
HBA-LCR	Alpha-Globin Locus Control Region
TRADD	TNFRSF1A Associated Via Death Domain
TRA	T Cell Receptor Alpha Locus
ATP5IF1	ATP Synthase Inhibitory Factor Subunit 1
ADPRH	ADP-Ribosylarginine Hydrolase
MYO18A	Myosin XVIIIA
STX4	Syntaxin 4
ENDOG	Endonuclease G
SUV39H1	Suppressor Of Variegation 3-9 Homolog 1
PPP2CA	Protein Phosphatase 2 Catalytic Subunit Alpha
STX7	Syntaxin 7
GYPC	Glycophorin C (Gerbich Blood Group)
IL1RAP	Interleukin 1 Receptor Accessory Protein
TSPAN32	Tetraspanin 32
DOK2	Docking Protein 2
SERPINB10	Serpin Family B Member 10
NAT2	N-Acetyltransferase 2
FES	FES Proto-Oncogene, Tyrosine Kinase
TLN1	Talin 1
ESPL1	Extra Spindle Pole Bodies Like 1, Separase
LOC106865369	Nucleoporin 98kDa Recombination Region
ALPG	Alkaline Phosphatase, Germ Cell
PPIC	Peptidylprolyl Isomerase C
ORC5	Origin Recognition Complex Subunit 5
FRYL	FRY Like Transcription Coactivator
SERPINB2	Serpin Family B Member 2
GOT1	Glutamic-Oxaloacetic Transaminase 1
PTPN13	Protein Tyrosine Phosphatase Non-Receptor Type 13
ITGA5	Integrin Subunit Alpha 5
SFRP1	Secreted Frizzled Related Protein 1
P2RY1	Purinergic Receptor P2Y1
TAF7L	TATA-Box Binding Protein Associated Factor 7 Like
ATG3	Autophagy Related 3
TPSAB1	Tryptase Alpha/Beta 1
MAPKAPK2	MAPK Activated Protein Kinase 2
TCEA3	Transcription Elongation Factor A3
CASP6	Caspase 6
TNFRSF10D	TNF Receptor Superfamily Member 10d
UBE2N	Ubiquitin Conjugating Enzyme E2 N
NUMB	NUMB Endocytic Adaptor Protein
NSMAF	Neutral Sphingomyelinase Activation Associated Factor
IL27RA	Interleukin 27 Receptor Subunit Alpha
BID	BH3 Interacting Domain Death Agonist
HSPA1B	Heat Shock Protein Family A (Hsp70) Member 1B
CARD16	Caspase Recruitment Domain Family Member 16
SERPINB1	Serpin Family B Member 1
NFS1	NFS1 Cysteine Desulfurase
RPN1	Ribophorin I
REL	REL Proto-Oncogene, NF-KB Subunit
IFRD1	Interferon Related Developmental Regulator 1
CD84	CD84 Molecule
DAB2	DAB Adaptor Protein 2
CDKN2D	Cyclin Dependent Kinase Inhibitor 2D
RAP1GAP	RAP1 GTPase Activating Protein
SLC7A5	Solute Carrier Family 7 Member 5
ATG7	Autophagy Related 7
SEC61A1	SEC61 Translocon Subunit Alpha 1
PTK2B	Protein Tyrosine Kinase 2 Beta
JUND	JunD Proto-Oncogene, AP-1 Transcription Factor Subunit
PDE4A	Phosphodiesterase 4A
MS4A1	Membrane Spanning 4-Domains A1
RRM2	Ribonucleotide Reductase Regulatory Subunit M2
CPQ	Carboxypeptidase Q
NNAT	Neuronatin
NXF1	Nuclear RNA Export Factor 1
NQO2	N-Ribosyldihydronicotinamide:Quinone Reductase 2
UBE2D3	Ubiquitin Conjugating Enzyme E2 D3
SAP30L	SAP30 Like
LOC107980440	ABL Breakpoint Recombination Region
PDCD1LG2	Programmed Cell Death 1 Ligand 2
FAM114A2	Family With Sequence Similarity 114 Member A2
TRIM24	Tripartite Motif Containing 24
ISCU	Iron-Sulfur Cluster Assembly Enzyme
LOC107963955	BCR-ABL Major-Breakpoint Cluster Region
KIR3DL3	Killer Cell Immunoglobulin Like Receptor, Three Ig Domains And Long Cytoplasmic Tail 3
TK1	Thymidine Kinase 1
TTF1	Transcription Termination Factor 1
TAFA4	TAFA Chemokine Like Family Member 4
ENSG00000228238
ENSG00000258551
lnc-PTGS2-2
ENSG00000287622
piR-30764-001
ENSG00000286922
RRM1	Ribonucleotide Reductase Catalytic Subunit M1
RALA	RAS Like Proto-Oncogene A
KLF5	Kruppel Like Factor 5
DIDO1	Death Inducer-Obliterator 1
HSPH1	Heat Shock Protein Family H (Hsp110) Member 1
UROS	Uroporphyrinogen III Synthase
BIRC7	Baculoviral IAP Repeat Containing 7
LOC106865368	Inversion(11)(P15q22) DEAD (Asp-Glu-Ala-Asp) Box Polypeptide 10 Recombination Region
AHSP	Alpha Hemoglobin Stabilizing Protein
KLRG1	Killer Cell Lectin Like Receptor G1
HIPK2	Homeodomain Interacting Protein Kinase 2
CTAG1B	Cancer/Testis Antigen 1B
ATG12	Autophagy Related 12
CLIC1	Chloride Intracellular Channel 1
RALGDS	Ral Guanine Nucleotide Dissociation Stimulator
BACH1	BTB Domain And CNC Homolog 1
TRIB1	Tribbles Pseudokinase 1
CEP43	Centrosomal Protein 43
ZBTB17	Zinc Finger And BTB Domain Containing 17
P2RX7	Purinergic Receptor P2X 7
MAML2	Mastermind Like Transcriptional Coactivator 2
BLZF1	Basic Leucine Zipper Nuclear Factor 1
MIR134	MicroRNA 134
KIR2DL4	Killer Cell Immunoglobulin Like Receptor, Two Ig Domains And Long Cytoplasmic Tail 4
DCTN4	Dynactin Subunit 4
MIR124-2	MicroRNA 124-2
MIR124-3	MicroRNA 124-3
CD200	CD200 Molecule
PRDX2	Peroxiredoxin 2
G3BP1	G3BP Stress Granule Assembly Factor 1
HOXB-AS3	HOXB Cluster Antisense RNA 3
SMIM32	Small Integral Membrane Protein 32
TRIB3	Tribbles Pseudokinase 3
CSK	C-Terminal Src Kinase
MYL12A	Myosin Light Chain 12A
FECH	Ferrochelatase
METAP1	Methionyl Aminopeptidase 1
POLE2	DNA Polymerase Epsilon 2, Accessory Subunit
LARP1	La Ribonucleoprotein 1, Translational Regulator
IKZF3	IKAROS Family Zinc Finger 3
SMAD5	SMAD Family Member 5
JTB	Jumping Translocation Breakpoint
SMPD3	Sphingomyelin Phosphodiesterase 3
TRD	T Cell Receptor Delta Locus
EEA1	Early Endosome Antigen 1
PDCD6	Programmed Cell Death 6
MAPK9	Mitogen-Activated Protein Kinase 9
NME4	NME/NM23 Nucleoside Diphosphate Kinase 4
GSTA1	Glutathione S-Transferase Alpha 1
ETF1	Eukaryotic Translation Termination Factor 1
MIR874	MicroRNA 874
LRG1	Leucine Rich Alpha-2-Glycoprotein 1
ORC2	Origin Recognition Complex Subunit 2
USP42	Ubiquitin Specific Peptidase 42
ENPP3	Ectonucleotide Pyrophosphatase/Phosphodiesterase 3
SPHK1	Sphingosine Kinase 1
PLK2	Polo Like Kinase 2
MSI2	Musashi RNA Binding Protein 2
ECSCR	Endothelial Cell Surface Expressed Chemotaxis And Apoptosis Regulator
CIP2A	Cellular Inhibitor Of PP2A
EPB41	Erythrocyte Membrane Protein Band 4.1
BLNK	B Cell Linker
SPATA24	Spermatogenesis Associated 24
UBE2I	Ubiquitin Conjugating Enzyme E2 I
ICAM2	Intercellular Adhesion Molecule 2
ATG10	Autophagy Related 10
PAIP2	Poly(A) Binding Protein Interacting Protein 2
UCK1	Uridine-Cytidine Kinase 1
TRPC7	Transient Receptor Potential Cation Channel Subfamily C Member 7
DNAJC18	DnaJ Heat Shock Protein Family (Hsp40) Member C18
PROB1	Proline Rich Basic Protein 1
MIR1275	MicroRNA 1275
SNORA74A	Small Nucleolar RNA, H/ACA Box 74A
RNU12	RNA, U12 Small Nuclear
C5orf66-AS2	C5orf66 Antisense RNA 2
LOC100130172	Uncharacterized LOC100130172
LOC100128966	Uncharacterized LOC100128966
HNRNPA1P13	Heterogeneous Nuclear Ribonucleoprotein A1 Pseudogene 13
NCOA4P4	Nuclear Receptor Coactivator 4 Pseudogene 4
ANKRD49P3	ANKRD49 Pseudogene 3
RPL10AP10	Ribosomal Protein L10a Pseudogene 10
HBFQTL4	Fetal Hemoglobin QTL On Chromosome 8
CCAT2	Colon Cancer Associated Transcript 2
SLC12A9	Solute Carrier Family 12 Member 9
CD177	CD177 Molecule
EPHA3	EPH Receptor A3
PGD	Phosphogluconate Dehydrogenase
DDR1	Discoidin Domain Receptor Tyrosine Kinase 1
SELENOP	Selenoprotein P
E2F4	E2F Transcription Factor 4
SLC16A1	Solute Carrier Family 16 Member 1
DDX43	DEAD-Box Helicase 43
PTPN7	Protein Tyrosine Phosphatase Non-Receptor Type 7
U2AF2	U2 Small Nuclear RNA Auxiliary Factor 2
JDP2	Jun Dimerization Protein 2
SEMA3B	Semaphorin 3B
KIR2DS1	Killer Cell Immunoglobulin Like Receptor, Two Ig Domains And Short Cytoplasmic Tail 1
GHS	Goldenhar Syndrome
MIR595	MicroRNA 595
ARHGAP45	Rho GTPase Activating Protein 45
OSM	Oncostatin M
CD99	CD99 Molecule (Xg Blood Group)
TSPAN33	Tetraspanin 33
ZAN	Zonadhesin
KIF20A	Kinesin Family Member 20A
MSBP2	Minisatellite Binding Protein 2
DPYSL3	Dihydropyrimidinase Like 3
KIR3DS1	Killer Cell Immunoglobulin Like Receptor, Three Ig Domains And Short Cytoplasmic Tail 1
UBE2V2	Ubiquitin Conjugating Enzyme E2 V2
REEP2	Receptor Accessory Protein 2
NFE2	Nuclear Factor, Erythroid 2
GSK3A	Glycogen Synthase Kinase 3 Alpha
BACH2	BTB Domain And CNC Homolog 2
NXF2	Nuclear RNA Export Factor 2
DMTF1	Cyclin D Binding Myb Like Transcription Factor 1
UBE2G1	Ubiquitin Conjugating Enzyme E2 G1
SEPTIN2	Septin 2
MYNN	Myoneurin
TNFSF9	TNF Superfamily Member 9
CHFR	Checkpoint With Forkhead And Ring Finger Domains
SUGP1	SURP And G-Patch Domain Containing 1
KIR2DS5	Killer Cell Immunoglobulin Like Receptor, Two Ig Domains And Short Cytoplasmic Tail 5
KIR2DS3	Killer Cell Immunoglobulin Like Receptor, Two Ig Domains And Short Cytoplasmic Tail 3
TCL1A	TCL1 Family AKT Coactivator A
TNFSF14	TNF Superfamily Member 14
CD83	CD83 Molecule
FAXDC2	Fatty Acid Hydroxylase Domain Containing 2
TIGIT	T Cell Immunoreceptor With Ig And ITIM Domains
FAM53C	Family With Sequence Similarity 53 Member C
TCIM	Transcriptional And Immune Response Regulator
KIR2DS2	Killer Cell Immunoglobulin Like Receptor, Two Ig Domains And Short Cytoplasmic Tail 2
H3-4	H3.4 Histone
LOC107105350	NUP98-HOXC11 Recombination Region
MYBL2	MYB Proto-Oncogene Like 2
SLC36A2	Solute Carrier Family 36 Member 2
PIWIL2	Piwi Like RNA-Mediated Gene Silencing 2
BMX	BMX Non-Receptor Tyrosine Kinase
NAP1L2	Nucleosome Assembly Protein 1 Like 2
RASGRP4	RAS Guanyl Releasing Protein 4
L3MBTL1	L3MBTL Histone Methyl-Lysine Binding Protein 1
KIR2DL2	Killer Cell Immunoglobulin Like Receptor, Two Ig Domains And Long Cytoplasmic Tail 2
PCBP1	Poly(RC) Binding Protein 1
CXXC5	CXXC Finger Protein 5
AURKC	Aurora Kinase C
ATG2B	Autophagy Related 2B
GLIPR1	GLI Pathogenesis Related 1
KIR2DL5A	Killer Cell Immunoglobulin Like Receptor, Two Ig Domains And Long Cytoplasmic Tail 5A
JUNB	JunB Proto-Oncogene, AP-1 Transcription Factor Subunit
LOC107126359	NUP98-HOXD13 Recombination Region
SOCS2	Suppressor Of Cytokine Signaling 2
CD160	CD160 Molecule
ARHGEF12	Rho Guanine Nucleotide Exchange Factor 12
LOC107133517	NUP98-IQCG Recombination Region
LOC107133518	NUP98-TOP2B Recombination Region
LOC107195252	NUP98-HHEX Recombination Region
CNOT8	CCR4-NOT Transcription Complex Subunit 8
RPL22P1	Ribosomal Protein L22 Pseudogene 1
MIR7977	MicroRNA 7977
INTS6	Integrator Complex Subunit 6
FBXL5	F-Box And Leucine Rich Repeat Protein 5
UFSP1	UFM1 Specific Peptidase 1 (Inactive)
CHST9	Carbohydrate Sulfotransferase 9
ZFP91	ZFP91 Zinc Finger Protein, Atypical E3 Ubiquitin Ligase
FAM13B	Family With Sequence Similarity 13 Member B
PTP4A2	Protein Tyrosine Phosphatase 4A2
MACROD1	Mono-ADP Ribosylhydrolase 1
LOC106707172	WT1 Intron 3 Regulatory Region
PDLIM4	PDZ And LIM Domain 4
KDM5D	Lysine Demethylase 5D
PSMG2	Proteasome Assembly Chaperone 2
OR4D2	Olfactory Receptor Family 4 Subfamily D Member 2
RAP1BL	RAP1B Like (Pseudogene)
LOC111188156	CSF1R Promoter/Intronic Regulatory Region
BRD8	Bromodomain Containing 8
LAG3	Lymphocyte Activating 3
HNRNPA0	Heterogeneous Nuclear Ribonucleoprotein A0
SLC36A1	Solute Carrier Family 36 Member 1
GSTA2	Glutathione S-Transferase Alpha 2
TM9SF4	Transmembrane 9 Superfamily Member 4
ZMAT4	Zinc Finger Matrin-Type 4
POLE3	DNA Polymerase Epsilon 3, Accessory Subunit
POLE4	DNA Polymerase Epsilon 4, Accessory Subunit
RAP1GDS1	Rap1 GTPase-GDP Dissociation Stimulator 1
STYK1	Serine/Threonine/Tyrosine Kinase 1
RAET1L	Retinoic Acid Early Transcript 1L
GSKIP	GSK3B Interacting Protein
ZRSR2P1	ZRSR2 Pseudogene 1
MIR663B	MicroRNA 663b
MIR1245A	MicroRNA 1245a
AMLCR2	Acute Myeloid Leukemia Chromosome Region 2
TRIP6	Thyroid Hormone Receptor Interactor 6
CKAP2	Cytoskeleton Associated Protein 2
GIGYF1	GRB10 Interacting GYF Protein 1
MLLT11	MLLT11 Transcription Factor 7 Cofactor
MLF2	Myeloid Leukemia Factor 2
CBLC	Cbl Proto-Oncogene C
NR4A3	Nuclear Receptor Subfamily 4 Group A Member 3
UTY	Ubiquitously Transcribed Tetratricopeptide Repeat Containing, Y-Linked
OIP5	Opa Interacting Protein 5
HOXB4	Homeobox B4
SLC36A3	Solute Carrier Family 36 Member 3
CCDC28A	Coiled-Coil Domain Containing 28A
HMHB1	Histocompatibility Minor HB-1

## Sheet: AML
Targets of Acute Myeloid Leukemia (AML)
Gene Symbol	Description
RUNX1	RUNX Family Transcription Factor 1
FLT3	Fms Related Receptor Tyrosine Kinase 3
CEBPA	CCAAT Enhancer Binding Protein Alpha
TP53	Tumor Protein P53
KIT	KIT Proto-Oncogene, Receptor Tyrosine Kinase
JAK2	Janus Kinase 2
NPM1	Nucleophosmin 1
ABL1	ABL Proto-Oncogene 1, Non-Receptor Tyrosine Kinase
ETV6	ETS Variant Transcription Factor 6
GATA2	GATA Binding Protein 2
KRAS	KRAS Proto-Oncogene, GTPase
KMT2A	Lysine Methyltransferase 2A
DNMT3A	DNA Methyltransferase 3 Alpha
NRAS	NRAS Proto-Oncogene, GTPase
TET2	Tet Methylcytosine Dioxygenase 2
BCR	BCR Activator Of RhoGEF And GTPase
U2AF1	U2 Small Nuclear RNA Auxiliary Factor 1
PTPN11	Protein Tyrosine Phosphatase Non-Receptor Type 11
WT1	WT1 Transcription Factor
HRAS	HRas Proto-Oncogene, GTPase
TERT	Telomerase Reverse Transcriptase
MYC	MYC Proto-Oncogene, BHLH Transcription Factor
CSF3R	Colony Stimulating Factor 3 Receptor
CBFB	Core-Binding Factor Subunit Beta
RARA	Retinoic Acid Receptor Alpha
THPO	Thrombopoietin
GATA1	GATA Binding Protein 1
TAL1	TAL BHLH Transcription Factor 1, Erythroid Differentiation Factor
ASXL1	ASXL Transcriptional Regulator 1
TNF	Tumor Necrosis Factor
CBL	Cbl Proto-Oncogene
STAT3	Signal Transducer And Activator Of Transcription 3
CREBBP	CREB Binding Protein
SETBP1	SET Binding Protein 1
MPL	MPL Proto-Oncogene, Thrombopoietin Receptor
IKZF1	IKAROS Family Zinc Finger 1
STAT5B	Signal Transducer And Activator Of Transcription 5B
PML	PML Nuclear Body Scaffold
CDKN2B	Cyclin Dependent Kinase Inhibitor 2B
IDH1	Isocitrate Dehydrogenase (NADP(+)) 1
MLLT10	MLLT10 Histone Lysine Methyltransferase DOT1L Cofactor
NOTCH1	Notch Receptor 1
SF3B1	Splicing Factor 3b Subunit 1
NF1	Neurofibromin 1
PAX5	Paired Box 5
NUP214	Nucleoporin 214
CDKN2A	Cyclin Dependent Kinase Inhibitor 2A
CDKN1A	Cyclin Dependent Kinase Inhibitor 1A
MECOM	MDS1 And EVI1 Complex Locus
IL10	Interleukin 10
RUNX1T1	RUNX1 Partner Transcriptional Co-Repressor 1
CCND1	Cyclin D1
PDGFRB	Platelet Derived Growth Factor Receptor Beta
BAX	BCL2 Associated X, Apoptosis Regulator
IDH2	Isocitrate Dehydrogenase (NADP(+)) 2
ATM	ATM Serine/Threonine Kinase
MLLT3	MLLT3 Super Elongation Complex Subunit
JAK3	Janus Kinase 3
PICALM	Phosphatidylinositol Binding Clathrin Assembly Protein
PTEN	Phosphatase And Tensin Homolog
BRCA2	BRCA2 DNA Repair Associated
FGFR1	Fibroblast Growth Factor Receptor 1
PBX1	PBX Homeobox 1
VEGFA	Vascular Endothelial Growth Factor A
NSD1	Nuclear Receptor Binding SET Domain Protein 1
ELANE	Elastase, Neutrophil Expressed
SRSF2	Serine And Arginine Rich Splicing Factor 2
SETD2	SET Domain Containing 2, Histone Lysine Methyltransferase
KAT6A	Lysine Acetyltransferase 6A
CALR	Calreticulin
PTPRC	Protein Tyrosine Phosphatase Receptor Type C
ZBTB16	Zinc Finger And BTB Domain Containing 16
MYB	MYB Proto-Oncogene, Transcription Factor
CDK4	Cyclin Dependent Kinase 4
MIR223	MicroRNA 223
EP300	E1A Binding Protein P300
TCF3	Transcription Factor 3
CXCR4	C-X-C Motif Chemokine Receptor 4
PDGFRA	Platelet Derived Growth Factor Receptor Alpha
CSF2	Colony Stimulating Factor 2
CSF3	Colony Stimulating Factor 3
AFF1	AF4/FMR2 Family Member 1
MYH11	Myosin Heavy Chain 11
MDM2	MDM2 Proto-Oncogene
IFNG	Interferon Gamma
CHIC2	Cysteine Rich Hydrophobic Domain 2
SRC	SRC Proto-Oncogene, Non-Receptor Tyrosine Kinase
CDKN1B	Cyclin Dependent Kinase Inhibitor 1B
MIR126	MicroRNA 126
IRF8	Interferon Regulatory Factor 8
SH3GL1	SH3 Domain Containing GRB2 Like 1, Endophilin A2
SAMD9L	Sterile Alpha Motif Domain Containing 9 Like
GFI1	Growth Factor Independent 1 Transcriptional Repressor
DDX41	DEAD-Box Helicase 41
MPO	Myeloperoxidase
MCL1	MCL1 Apoptosis Regulator, BCL2 Family Member
IL6	Interleukin 6
ABCB1	ATP Binding Cassette Subfamily B Member 1
CTLA4	Cytotoxic T-Lymphocyte Associated Protein 4
CTNNB1	Catenin Beta 1
MIR17	MicroRNA 17
IL3	Interleukin 3
MIR125A	MicroRNA 125a
ITGB3	Integrin Subunit Beta 3
EPOR	Erythropoietin Receptor
PIK3CA	Phosphatidylinositol-4,5-Bisphosphate 3-Kinase Catalytic Subunit Alpha
IL7R	Interleukin 7 Receptor
MIR155	MicroRNA 155
MAP2K1	Mitogen-Activated Protein Kinase Kinase 1
DNAJC21	DnaJ Heat Shock Protein Family (Hsp40) Member C21
LPP	LIM Domain Containing Preferred Translocation Partner In Lipoma
RPS14	Ribosomal Protein S14
NBN	Nibrin
FIP1L1	Factor Interacting With PAPOLA And CPSF1
NUP98	Nucleoporin 98 And 96 Precursor
RTEL1	Regulator Of Telomere Elongation Helicase 1
MIR18A	MicroRNA 18a
MIR210	MicroRNA 210
CHEK2	Checkpoint Kinase 2
ACTB	Actin Beta
MIR27A	MicroRNA 27a
MIRLET7C	MicroRNA Let-7c
BRD4	Bromodomain Containing 4
CBFA2T3	CBFA2/RUNX1 Partner Transcriptional Co-Repressor 3
FLT1	Fms Related Receptor Tyrosine Kinase 1
SET	SET Nuclear Proto-Oncogene
ICAM1	Intercellular Adhesion Molecule 1
RB1	RB Transcriptional Corepressor 1
RAF1	Raf-1 Proto-Oncogene, Serine/Threonine Kinase
CD33	CD33 Molecule
ITGA2B	Integrin Subunit Alpha 2b
HLA-A	Major Histocompatibility Complex, Class I, A
MYCN	MYCN Proto-Oncogene, BHLH Transcription Factor
DEK	DEK Proto-Oncogene
FOXP3	Forkhead Box P3
BCOR	BCL6 Corepressor
FANCA	FA Complementation Group A
MIR15A	MicroRNA 15a
STAT5A	Signal Transducer And Activator Of Transcription 5A
IFNA1	Interferon Alpha 1
MIR424	MicroRNA 424
CD34	CD34 Molecule
CASP3	Caspase 3
CCR5	C-C Motif Chemokine Receptor 5
MIR34A	MicroRNA 34a
KITLG	KIT Ligand
RAD51	RAD51 Recombinase
HOXA9	Homeobox A9
F2	Coagulation Factor II, Thrombin
MIR199B	MicroRNA 199b
BCL2	BCL2 Apoptosis Regulator
THBD	Thrombomodulin
JAK1	Janus Kinase 1
RBM15	RNA Binding Motif Protein 15
BRCA1	BRCA1 DNA Repair Associated
IL1B	Interleukin 1 Beta
BCL2L1	BCL2 Like 1
BAALC	BAALC Binder Of MAP3K1 And KLF4
MEIS1	Meis Homeobox 1
IL2	Interleukin 2
PRF1	Perforin 1
ESR1	Estrogen Receptor 1
CXCL8	C-X-C Motif Chemokine Ligand 8
FANCC	FA Complementation Group C
MIR130B	MicroRNA 130b
HLA-C	Major Histocompatibility Complex, Class I, C
KMT2D	Lysine Methyltransferase 2D
ABCC1	ATP Binding Cassette Subfamily C Member 1
AKT1	AKT Serine/Threonine Kinase 1
ANPEP	Alanyl Aminopeptidase, Membrane
GNB1	G Protein Subunit Beta 1
MIR378A	MicroRNA 378a
MLF1	Myeloid Leukemia Factor 1
ERBB3	Erb-B2 Receptor Tyrosine Kinase 3
SPI1	Spi-1 Proto-Oncogene
MIR29A	MicroRNA 29a
TLX1	T Cell Leukemia Homeobox 1
CSF1R	Colony Stimulating Factor 1 Receptor
DNTT	DNA Nucleotidylexotransferase
BCL6	BCL6 Transcription Repressor
ITGAM	Integrin Subunit Alpha M
LYN	LYN Proto-Oncogene, Src Family Tyrosine Kinase
MIR145	MicroRNA 145
FAS	Fas Cell Surface Death Receptor
MAPK1	Mitogen-Activated Protein Kinase 1
EWSR1	EWS RNA Binding Protein 1
TGM6	Transglutaminase 6
XIAP	X-Linked Inhibitor Of Apoptosis
CRLF2	Cytokine Receptor Like Factor 2
HLF	HLF Transcription Factor, PAR BZIP Family Member
GYPA	Glycophorin A (MNS Blood Group)
ANXA5	Annexin A5
EPO	Erythropoietin
MLLT1	MLLT1 Super Elongation Complex Subunit
STAT1	Signal Transducer And Activator Of Transcription 1
MIR106B	MicroRNA 106b
ABCG2	ATP Binding Cassette Subfamily G Member 2 (Junior Blood Group)
APC	APC Regulator Of WNT Signaling Pathway
MSH2	MutS Homolog 2
TLR2	Toll Like Receptor 2
MIR181A2	MicroRNA 181a-2
MAPK8	Mitogen-Activated Protein Kinase 8
IL4	Interleukin 4
JUN	Jun Proto-Oncogene, AP-1 Transcription Factor Subunit
MIR30D	MicroRNA 30d
ELN	Elastin
CD38	CD38 Molecule
MIR326	MicroRNA 326
PARP1	Poly(ADP-Ribose) Polymerase 1
MIR34B	MicroRNA 34b
CASP8	Caspase 8
CSF1	Colony Stimulating Factor 1
HFE	Homeostatic Iron Regulator
MRTFA	Myocardin Related Transcription Factor A
ERCC6L2	ERCC Excision Repair 6 Like 2
MIR331	MicroRNA 331
RANBP2	RAN Binding Protein 2
NUMA1	Nuclear Mitotic Apparatus Protein 1
MVP	Major Vault Protein
MIR203A	MicroRNA 203a
LIF	LIF Interleukin 6 Family Cytokine
HLA-B	Major Histocompatibility Complex, Class I, B
BRAF	B-Raf Proto-Oncogene, Serine/Threonine Kinase
MYD88	MYD88 Innate Immune Signal Transduction Adaptor
CD7	CD7 Molecule
MIR204	MicroRNA 204
MIR127	MicroRNA 127
PRTN3	Proteinase 3
SBDS	SBDS Ribosome Maturation Factor
MIR320A	MicroRNA 320a
CCNA2	Cyclin A2
CSF2RA	Colony Stimulating Factor 2 Receptor Subunit Alpha
PRAME	PRAME Nuclear Receptor Transcriptional Regulator
MME	Membrane Metalloendopeptidase
ITGB2	Integrin Subunit Beta 2
MIR324	MicroRNA 324
EZH2	Enhancer Of Zeste 2 Polycomb Repressive Complex 2 Subunit
ALB	Albumin
IL7	Interleukin 7
CASP9	Caspase 9
CXCL12	C-X-C Motif Chemokine Ligand 12
CBFA2T2	CBFA2/RUNX1 Partner Transcriptional Co-Repressor 2
G6PD	Glucose-6-Phosphate Dehydrogenase
HDAC9	Histone Deacetylase 9
AFDN	Afadin, Adherens Junction Formation Factor
CYCS	Cytochrome C, Somatic
ENG	Endoglin
CD19	CD19 Molecule
BCL2L11	BCL2 Like 11
IL3RA	Interleukin 3 Receptor Subunit Alpha
CREB1	CAMP Responsive Element Binding Protein 1
LMO2	LIM Domain Only 2
CDK2	Cyclin Dependent Kinase 2
DCK	Deoxycytidine Kinase
RUNX3	RUNX Family Transcription Factor 3
TPMT	Thiopurine S-Methyltransferase
FOS	Fos Proto-Oncogene, AP-1 Transcription Factor Subunit
MTOR	Mechanistic Target Of Rapamycin Kinase
CD4	CD4 Molecule
RAG1	Recombination Activating 1
MTHFR	Methylenetetrahydrofolate Reductase
CDH1	Cadherin 1
CEBPE	CCAAT Enhancer Binding Protein Epsilon
MMP9	Matrix Metallopeptidase 9
NCAM1	Neural Cell Adhesion Molecule 1
CD8A	CD8a Molecule
LIG4	DNA Ligase 4
HPRT1	Hypoxanthine Phosphoribosyltransferase 1
TAL2	TAL BHLH Transcription Factor 2
SELP	Selectin P
CDK6	Cyclin Dependent Kinase 6
LEF1	Lymphoid Enhancer Binding Factor 1
RUNX2	RUNX Family Transcription Factor 2
FLI1	Fli-1 Proto-Oncogene, ETS Transcription Factor
EFL1	Elongation Factor Like GTPase 1
LCK	LCK Proto-Oncogene, Src Family Tyrosine Kinase
CD44	CD44 Molecule (Indian Blood Group)
CDK1	Cyclin Dependent Kinase 1
SOS1	SOS Ras/Rac Guanine Nucleotide Exchange Factor 1
CD40LG	CD40 Ligand
MAPK3	Mitogen-Activated Protein Kinase 3
ITGAX	Integrin Subunit Alpha X
TNFSF10	TNF Superfamily Member 10
CEBPB	CCAAT Enhancer Binding Protein Beta
DNMT1	DNA Methyltransferase 1
ALK	ALK Receptor Tyrosine Kinase
CRP	C-Reactive Protein
TOP1	DNA Topoisomerase I
FASLG	Fas Ligand
PMS2	PMS1 Homolog 2, Mismatch Repair System Component
SMAD4	SMAD Family Member 4
MIR19A	MicroRNA 19a
IL1RN	Interleukin 1 Receptor Antagonist
IL15	Interleukin 15
ERBB2	Erb-B2 Receptor Tyrosine Kinase 2
EGFR	Epidermal Growth Factor Receptor
KDM4C	Lysine Demethylase 4C
TCL1A	TCL1 Family AKT Coactivator A
MIR20A	MicroRNA 20a
BTK	Bruton Tyrosine Kinase
TERC	Telomerase RNA Component
DKC1	Dyskerin Pseudouridine Synthase 1
BIRC5	Baculoviral IAP Repeat Containing 5
CD14	CD14 Molecule
PROM1	Prominin 1
TGFB1	Transforming Growth Factor Beta 1
BCL10	BCL10 Immune Signaling Adaptor
MIR142	MicroRNA 142
BMI1	BMI1 Proto-Oncogene, Polycomb Ring Finger
ELL	Elongation Factor For RNA Polymerase II
FBXW7	F-Box And WD Repeat Domain Containing 7
CCR6	C-C Motif Chemokine Receptor 6
FES	FES Proto-Oncogene, Tyrosine Kinase
CDKN2C	Cyclin Dependent Kinase Inhibitor 2C
ERCC2	ERCC Excision Repair 2, TFIIH Core Complex Helicase Subunit
SYK	Spleen Associated Tyrosine Kinase
HIF1A	Hypoxia Inducible Factor 1 Subunit Alpha
H2AC18	H2A Clustered Histone 18
PRAM1	PML-RARA Regulated Adaptor Molecule 1
MIR10A	MicroRNA 10a
KDR	Kinase Insert Domain Receptor
TBL1XR1	TBL1X Receptor 1
ARID5B	AT-Rich Interaction Domain 5B
GRB2	Growth Factor Receptor Bound Protein 2
MIR16-1	MicroRNA 16-1
TFRC	Transferrin Receptor
MIR9-1	MicroRNA 9-1
MIR221	MicroRNA 221
HSP90AA1	Heat Shock Protein 90 Alpha Family Class A Member 1
LUC7L2	LUC7 Like 2, Pre-MRNA Splicing Factor
KLRK1	Killer Cell Lectin Like Receptor K1
IKZF3	IKAROS Family Zinc Finger 3
CD22	CD22 Molecule
RARS1	Arginyl-TRNA Synthetase 1
KIR3DL1	Killer Cell Immunoglobulin Like Receptor, Three Ig Domains And Long Cytoplasmic Tail 1
LYL1	LYL1 Basic Helix-Loop-Helix Family Member
FGF2	Fibroblast Growth Factor 2
CDA	Cytidine Deaminase
ARHGAP26	Rho GTPase Activating Protein 26
CD5	CD5 Molecule
ATRX	ATRX Chromatin Remodeler
HDAC1	Histone Deacetylase 1
RPL5	Ribosomal Protein L5
ADA	Adenosine Deaminase
DICER1	Dicer 1, Ribonuclease III
FOXO3	Forkhead Box O3
IL2RA	Interleukin 2 Receptor Subunit Alpha
ASS1	Argininosuccinate Synthase 1
GSTM1	Glutathione S-Transferase Mu 1
MSH6	MutS Homolog 6
PIGA	Phosphatidylinositol Glycan Anchor Biosynthesis Class A
FUT4	Fucosyltransferase 4
MIR21	MicroRNA 21
PIK3CG	Phosphatidylinositol-4,5-Bisphosphate 3-Kinase Catalytic Subunit Gamma
CD79A	CD79a Molecule
SRP54	Signal Recognition Particle 54
CLEC12A	C-Type Lectin Domain Family 12 Member A
HOXA10	Homeobox A10
SH2B3	SH2B Adaptor Protein 3
IRF4	Interferon Regulatory Factor 4
ERG	ETS Transcription Factor ERG
CCND2	Cyclin D2
TNFRSF10B	TNF Receptor Superfamily Member 10b
TLX3	T Cell Leukemia Homeobox 3
HP	Haptoglobin
TLR4	Toll Like Receptor 4
CDKN2B-AS1	CDKN2B Antisense RNA 1
APAF1	Apoptotic Peptidase Activating Factor 1
EGF	Epidermal Growth Factor
EIF4EBP1	Eukaryotic Translation Initiation Factor 4E Binding Protein 1
KMT2C	Lysine Methyltransferase 2C
CRKL	CRK Like Proto-Oncogene, Adaptor Protein
PIM1	Pim-1 Proto-Oncogene, Serine/Threonine Kinase
LTA	Lymphotoxin Alpha
HOTAIR	HOX Transcript Antisense RNA
CD274	CD274 Molecule
PTPA	Protein Phosphatase 2 Phosphatase Activator
B2M	Beta-2-Microglobulin
MIR196A1	MicroRNA 196a-1
MIR199A1	MicroRNA 199a-1
WAS	WASP Actin Nucleation Promoting Factor
CCL2	C-C Motif Chemokine Ligand 2
CAT	Catalase
IL6ST	Interleukin 6 Signal Transducer
RPS19	Ribosomal Protein S19
NCOA2	Nuclear Receptor Coactivator 2
MAPK14	Mitogen-Activated Protein Kinase 14
THY1	Thy-1 Cell Surface Antigen
CD80	CD80 Molecule
VAV1	Vav Guanine Nucleotide Exchange Factor 1
MN1	MN1 Proto-Oncogene, Transcriptional Regulator
SERPINA3	Serpin Family A Member 3
GAPDH	Glyceraldehyde-3-Phosphate Dehydrogenase
FN1	Fibronectin 1
TNFRSF8	TNF Receptor Superfamily Member 8
NCOR1	Nuclear Receptor Corepressor 1
MIR128-2	MicroRNA 128-2
MIR181A1	MicroRNA 181a-1
MIR146A	MicroRNA 146a
CDKN3	Cyclin Dependent Kinase Inhibitor 3
HAVCR2	Hepatitis A Virus Cellular Receptor 2
ITGAL	Integrin Subunit Alpha L
SERPINC1	Serpin Family C Member 1
HOTAIRM1	HOXA Transcript Antisense RNA, Myeloid-Specific 1
ANKRD26	Ankyrin Repeat Domain 26
ICOSLG	Inducible T Cell Costimulator Ligand
PRKAR1A	Protein Kinase CAMP-Dependent Type I Regulatory Subunit Alpha
EIF4E	Eukaryotic Translation Initiation Factor 4E
CR1	Complement C3b/C4b Receptor 1 (Knops Blood Group)
NCOR2	Nuclear Receptor Corepressor 2
CD86	CD86 Molecule
CDKN1C	Cyclin Dependent Kinase Inhibitor 1C
TRIB2	Tribbles Pseudokinase 2
AXL	AXL Receptor Tyrosine Kinase
IL13	Interleukin 13
FCGR3B	Fc Fragment Of IgG Receptor IIIb
MEG3	Maternally Expressed 3
IFNA2	Interferon Alpha 2
MIR151A	MicroRNA 151a
IL11	Interleukin 11
PMAIP1	Phorbol-12-Myristate-13-Acetate-Induced Protein 1
IRF2BP2	Interferon Regulatory Factor 2 Binding Protein 2
NABP1	Nucleic Acid Binding Protein 1
APOE	Apolipoprotein E
HOXA7	Homeobox A7
F3	Coagulation Factor III, Tissue Factor
CD40	CD40 Molecule
PLK1	Polo Like Kinase 1
IGH	Immunoglobulin Heavy Locus
NTRK1	Neurotrophic Receptor Tyrosine Kinase 1
FCGR1A	Fc Fragment Of IgG Receptor Ia
IFIH1	Interferon Induced With Helicase C Domain 1
SUZ12	SUZ12 Polycomb Repressive Complex 2 Subunit
NFKBIA	NFKB Inhibitor Alpha
FANCD2	FA Complementation Group D2
MIRLET7A3	MicroRNA Let-7a-3
CHEK1	Checkpoint Kinase 1
MIR181A1HG	MIR181A1 Host Gene
SIRT1	Sirtuin 1
FLT3LG	Fms Related Receptor Tyrosine Kinase 3 Ligand
EGR1	Early Growth Response 1
GFI1B	Growth Factor Independent 1B Transcriptional Repressor
CD2	CD2 Molecule
MIR486-1	MicroRNA 486-1
RPS6KB1	Ribosomal Protein S6 Kinase B1
RPS24	Ribosomal Protein S24
DNMT3B	DNA Methyltransferase 3 Beta
TP73	Tumor Protein P73
VWF	Von Willebrand Factor
GSTT1	Glutathione S-Transferase Theta 1
PTPN6	Protein Tyrosine Phosphatase Non-Receptor Type 6
MNDA	Myeloid Cell Nuclear Differentiation Antigen
F5	Coagulation Factor V
MAP2K7	Mitogen-Activated Protein Kinase Kinase 7
MIR128-1	MicroRNA 128-1
RPS17	Ribosomal Protein S17
MIR23A	MicroRNA 23a
RPS28	Ribosomal Protein S28
MIR222	MicroRNA 222
CCNA1	Cyclin A1
MIR451A	MicroRNA 451a
MIR22	MicroRNA 22
GSTP1	Glutathione S-Transferase Pi 1
PRDM16	PR/SET Domain 16
PHF6	PHD Finger Protein 6
MIR150	MicroRNA 150
PTCH1	Patched 1
SOCS3	Suppressor Of Cytokine Signaling 3
H4-16	H4 Histone 16
MIRLET7D	MicroRNA Let-7d
XPO1	Exportin 1
CCDC26	CCDC26 Long Non-Coding RNA
DIABLO	Diablo IAP-Binding Mitochondrial Protein
MIR335	MicroRNA 335
MIR130A	MicroRNA 130a
LIFR	LIF Receptor Subunit Alpha
FCGR3A	Fc Fragment Of IgG Receptor IIIa
HCK	HCK Proto-Oncogene, Src Family Tyrosine Kinase
MIR23B	MicroRNA 23b
LOX	Lysyl Oxidase
UCA1	Urothelial Cancer Associated 1
TCIRG1	T Cell Immune Regulator 1, ATPase H+ Transporting V0 Subunit A3
TLR3	Toll Like Receptor 3
HAX1	HCLS1 Associated Protein X-1
RPL26	Ribosomal Protein L26
GZMB	Granzyme B
MALAT1	Metastasis Associated Lung Adenocarcinoma Transcript 1
HDAC2	Histone Deacetylase 2
RPL11	Ribosomal Protein L11
BIRC3	Baculoviral IAP Repeat Containing 3
NQO1	NAD(P)H Quinone Dehydrogenase 1
HLA-DRB1	Major Histocompatibility Complex, Class II, DR Beta 1
MIRLET7B	MicroRNA Let-7b
BCL2L2	BCL2 Like 2
MEN1	Menin 1
MIR29B1	MicroRNA 29b-1
KDM5A	Lysine Demethylase 5A
MLF2	Myeloid Leukemia Factor 2
TET1	Tet Methylcytosine Dioxygenase 1
MIR27B	MicroRNA 27b
IRF1	Interferon Regulatory Factor 1
HMBS	Hydroxymethylbilane Synthase
CD28	CD28 Molecule
IGF1R	Insulin Like Growth Factor 1 Receptor
CARTPT	CART Prepropeptide
ANXA8	Annexin A8
IGHV4-38-2	Immunoglobulin Heavy Variable 4-38-2
ARHGEF1	Rho Guanine Nucleotide Exchange Factor 1
TINF2	TERF1 Interacting Nuclear Factor 2
WRN	WRN RecQ Like Helicase
AURKB	Aurora Kinase B
U2AF1L4	U2 Small Nuclear RNA Auxiliary Factor 1 Like 4
MIR574	MicroRNA 574
TNFRSF9	TNF Receptor Superfamily Member 9
CDK9	Cyclin Dependent Kinase 9
SPN	Sialophorin
TUG1	Taurine Up-Regulated 1
EVPL	Envoplakin
SOCS1	Suppressor Of Cytokine Signaling 1
SERPINE1	Serpin Family E Member 1
KLF4	Kruppel Like Factor 4
MIR15B	MicroRNA 15b
TOP2A	DNA Topoisomerase II Alpha
SELL	Selectin L
DOT1L	DOT1 Like Histone Lysine Methyltransferase
PLAT	Plasminogen Activator, Tissue Type
CCL3	C-C Motif Chemokine Ligand 3
NME1	NME/NM23 Nucleoside Diphosphate Kinase 1
PPARG	Peroxisome Proliferator Activated Receptor Gamma
MIR182	MicroRNA 182
MIRLET7E	MicroRNA Let-7e
PARN	Poly(A)-Specific Ribonuclease
IRF3	Interferon Regulatory Factor 3
BIRC2	Baculoviral IAP Repeat Containing 2
FOXO1	Forkhead Box O1
IL1A	Interleukin 1 Alpha
ERCC6	ERCC Excision Repair 6, Chromatin Remodeling Factor
MIR30A	MicroRNA 30a
MIR193A	MicroRNA 193a
C3	Complement C3
ITGA4	Integrin Subunit Alpha 4
CD36	CD36 Molecule
NCR3	Natural Cytotoxicity Triggering Receptor 3
NLRP3	NLR Family Pyrin Domain Containing 3
CD47	CD47 Molecule
GMPS	Guanine Monophosphate Synthase
KIR2DL1	Killer Cell Immunoglobulin Like Receptor, Two Ig Domains And Long Cytoplasmic Tail 1
NCL	Nucleolin
HBB	Hemoglobin Subunit Beta
HOXA5	Homeobox A5
KDM6A	Lysine Demethylase 6A
POU5F1	POU Class 5 Homeobox 1
LEPR	Leptin Receptor
LOC107980440	ABL Breakpoint Recombination Region
RPS10	Ribosomal Protein S10
KIR2DL3	Killer Cell Immunoglobulin Like Receptor, Two Ig Domains And Long Cytoplasmic Tail 3
RPL35A	Ribosomal Protein L35a
TRD	T Cell Receptor Delta Locus
IL18	Interleukin 18
BRD2	Bromodomain Containing 2
MIR147A	MicroRNA 147a
STAG2	Stromal Antigen 2
RPL15	Ribosomal Protein L15
LRRC56	Leucine Rich Repeat Containing 56
CASP2	Caspase 2
CD226	CD226 Molecule
KLRD1	Killer Cell Lectin Like Receptor D1
TKT	Transketolase
HDAC6	Histone Deacetylase 6
ZAP70	Zeta Chain Of T Cell Receptor Associated Protein Kinase 70
SIGLEC5	Sialic Acid Binding Ig Like Lectin 5
CHUK	Component Of Inhibitor Of Nuclear Factor Kappa B Kinase Complex
KDM1A	Lysine Demethylase 1A
RPS27	Ribosomal Protein S27
BLM	BLM RecQ Like Helicase
DAPK1	Death Associated Protein Kinase 1
RPS26	Ribosomal Protein S26
SMC1A	Structural Maintenance Of Chromosomes 1A
RPS29	Ribosomal Protein S29
MIR339	MicroRNA 339
MIR140	MicroRNA 140
SMARCB1	SWI/SNF Related, Matrix Associated, Actin Dependent Regulator Of Chromatin, Subfamily B, Member 1
NCR2	Natural Cytotoxicity Triggering Receptor 2
MIR483	MicroRNA 483
MIR195	MicroRNA 195
TRG	T Cell Receptor Gamma Locus
CTCF	CCCTC-Binding Factor
AR	Androgen Receptor
KLRC1	Killer Cell Lectin Like Receptor C1
ZRSR2	Zinc Finger CCCH-Type, RNA Binding Motif And Serine/Arginine Rich 2
CD96	CD96 Molecule
MAPK9	Mitogen-Activated Protein Kinase 9
CASP10	Caspase 10
RPL31	Ribosomal Protein L31
NCR1	Natural Cytotoxicity Triggering Receptor 1
MIR30C1	MicroRNA 30c-1
TNFRSF10A	TNF Receptor Superfamily Member 10a
DHFR	Dihydrofolate Reductase
CCAT1	Colon Cancer Associated Transcript 1
IL17A	Interleukin 17A
SOX2	SRY-Box Transcription Factor 2
MIR34C	MicroRNA 34c
CD24	CD24 Molecule
GLIS2	GLIS Family Zinc Finger 2
H4C1	H4 Clustered Histone 1
CCR7	C-C Motif Chemokine Receptor 7
HSPA4	Heat Shock Protein Family A (Hsp70) Member 4
SLAMF1	Signaling Lymphocytic Activation Molecule Family Member 1
G6PC3	Glucose-6-Phosphatase Catalytic Subunit 3
SMC3	Structural Maintenance Of Chromosomes 3
TET3	Tet Methylcytosine Dioxygenase 3
ALDH1A1	Aldehyde Dehydrogenase 1 Family Member A1
TSR2	TSR2 Ribosome Maturation Factor
METTL3	Methyltransferase Like 3
MIR31	MicroRNA 31
SNAI1	Snail Family Transcriptional Repressor 1
SHC1	SHC Adaptor Protein 1
STUB1	STIP1 Homology And U-Box Containing Protein 1
NEAT1	Nuclear Paraspeckle Assembly Transcript 1
MLH1	MutL Homolog 1
AGO2	Argonaute RISC Catalytic Component 2
CFI	Complement Factor I
NANOG	Nanog Homeobox
CCND3	Cyclin D3
WT1-AS	WT1 Antisense RNA
MIR338	MicroRNA 338
CYP3A4	Cytochrome P450 Family 3 Subfamily A Member 4
MIR328	MicroRNA 328
MIR30E	MicroRNA 30e
MIR340	MicroRNA 340
MIR28	MicroRNA 28
BCORL1	BCL6 Corepressor Like 1
ABL2	ABL Proto-Oncogene 2, Non-Receptor Tyrosine Kinase
MIR423	MicroRNA 423
FER	FER Tyrosine Kinase
CSF2RB	Colony Stimulating Factor 2 Receptor Subunit Beta
SAMHD1	SAM And HD Domain Containing Deoxynucleoside Triphosphate Triphosphohydrolase 1
MIR532	MicroRNA 532
MIR181C	MicroRNA 181c
RPS3A	Ribosomal Protein S3A
FHIT	Fragile Histidine Triad Diadenosine Triphosphatase
ITGB1	Integrin Subunit Beta 1
MEFV	MEFV Innate Immuity Regulator, Pyrin
CD48	CD48 Molecule
WIPF1	WAS/WASL Interacting Protein Family Member 1
H4C3	H4 Clustered Histone 3
BHLHE40	Basic Helix-Loop-Helix Family Member E40
MIR337	MicroRNA 337
PLAUR	Plasminogen Activator, Urokinase Receptor
NOP10	NOP10 Ribonucleoprotein
PVT1	Pvt1 Oncogene
MIR455	MicroRNA 455
PALB2	Partner And Localizer Of BRCA2
INSL6	Insulin Like 6
MIR582	MicroRNA 582
XRCC1	X-Ray Repair Cross Complementing 1
ADAMTS13	ADAM Metallopeptidase With Thrombospondin Type 1 Motif 13
H4C2	H4 Clustered Histone 2
MIR374A	MicroRNA 374a
HGF	Hepatocyte Growth Factor
MIR542	MicroRNA 542
MIR628	MicroRNA 628
COLEC10	Collectin Subfamily Member 10
MIR154	MicroRNA 154
SF3B2	Splicing Factor 3b Subunit 2
VDR	Vitamin D Receptor
PRDM10	PR/SET Domain 10
FCGR2A	Fc Fragment Of IgG Receptor IIa
MIR223HG	MIR223 Host Gene
NR1H2	Nuclear Receptor Subfamily 1 Group H Member 2
PSMA7	Proteasome 20S Subunit Alpha 7
MIR212	MicroRNA 212
ASB2	Ankyrin Repeat And SOCS Box Containing 2
ID4	Inhibitor Of DNA Binding 4, HLH Protein
MIR302D	MicroRNA 302d
MIR367	MicroRNA 367
CTSG	Cathepsin G
INPP5D	Inositol Polyphosphate-5-Phosphatase D
NHP2	NHP2 Ribonucleoprotein
IL5	Interleukin 5
MATK	Megakaryocyte-Associated Tyrosine Kinase
BRD3	Bromodomain Containing 3
TCHP	Trichoplein Keratin Filament Binding
PF4	Platelet Factor 4
LCN2	Lipocalin 2
PIK3CD	Phosphatidylinositol-4,5-Bisphosphate 3-Kinase Catalytic Subunit Delta
GBA	Glucosylceramidase Beta
PCM1	Pericentriolar Material 1
H4C9	H4 Clustered Histone 9
PSMD4	Proteasome 26S Subunit, Non-ATPase 4
MIR184	MicroRNA 184
PRKG1	Protein Kinase CGMP-Dependent 1
PSMD5	Proteasome 26S Subunit, Non-ATPase 5
PRODH	Proline Dehydrogenase 1
H4C14	H4 Clustered Histone 14
RPS7	Ribosomal Protein S7
MIR590	MicroRNA 590
CEP70	Centrosomal Protein 70
GATA3	GATA Binding Protein 3
MIR330	MicroRNA 330
ABCA3	ATP Binding Cassette Subfamily A Member 3
H3-2	H3.2 Histone (Putative)
LSR	Lipolysis Stimulated Lipoprotein Receptor
TNFRSF1A	TNF Receptor Superfamily Member 1A
RECQL4	RecQ Like Helicase 4
IRAIN	IGF1R Antisense Imprinted Non-Protein Coding RNA
LCOR	Ligand Dependent Nuclear Receptor Corepressor
PIK3R1	Phosphoinositide-3-Kinase Regulatory Subunit 1
LMNA	Lamin A/C
H4C15	H4 Clustered Histone 15
RXRA	Retinoid X Receptor Alpha
H4C8	H4 Clustered Histone 8
MIR219A1	MicroRNA 219a-1
SULT2B1	Sulfotransferase Family 2B Member 1
BRDT	Bromodomain Testis Associated
KLRC2	Killer Cell Lectin Like Receptor C2
ZNF23	Zinc Finger Protein 23
CD46	CD46 Molecule
TLR5	Toll Like Receptor 5
RET	Ret Proto-Oncogene
H4C13	H4 Clustered Histone 13
MIR125B1	MicroRNA 125b-1
ADA2	Adenosine Deaminase 2
SLC22A1	Solute Carrier Family 22 Member 1
H19	H19 Imprinted Maternally Expressed Transcript
XRCC4	X-Ray Repair Cross Complementing 4
H4C12	H4 Clustered Histone 12
NTRK3	Neurotrophic Receptor Tyrosine Kinase 3
FANCG	FA Complementation Group G
NSMCE3	NSE3 Homolog, SMC5-SMC6 Complex Component
H4C11	H4 Clustered Histone 11
MIR615	MicroRNA 615
H4C4	H4 Clustered Histone 4
SERPINF2	Serpin Family F Member 2
HSPA8	Heat Shock Protein Family A (Hsp70) Member 8
RPS15	Ribosomal Protein S15
H4C5	H4 Clustered Histone 5
MIR376A1	MicroRNA 376a-1
MLLT11	MLLT11 Transcription Factor 7 Cofactor
H4C6	H4 Clustered Histone 6
TYROBP	Transmembrane Immune Signaling Adaptor TYROBP
CXCR1	C-X-C Motif Chemokine Receptor 1
CFH	Complement Factor H
NFE2L2	Nuclear Factor, Erythroid 2 Like 2
MIR432	MicroRNA 432
MIR744	MicroRNA 744
MIR372	MicroRNA 372
CYP1A1	Cytochrome P450 Family 1 Subfamily A Member 1
TUSC7	Tumor Suppressor Candidate 7
MIR325	MicroRNA 325
ENSG00000287119
TLR9	Toll Like Receptor 9
GLI1	GLI Family Zinc Finger 1
SMPD1	Sphingomyelin Phosphodiesterase 1
PLAU	Plasminogen Activator, Urokinase
GPT	Glutamic--Pyruvic Transaminase
CCL5	C-C Motif Chemokine Ligand 5
TTR	Transthyretin
BUB1B	BUB1 Mitotic Checkpoint Serine/Threonine Kinase B
PTGS2	Prostaglandin-Endoperoxide Synthase 2
SOCS2	Suppressor Of Cytokine Signaling 2
CASP7	Caspase 7
LMO1	LIM Domain Only 1
IL6R	Interleukin 6 Receptor
RARB	Retinoic Acid Receptor Beta
HLA-DPB1	Major Histocompatibility Complex, Class II, DP Beta 1
ALL1	Leukemia, Acute Lymphocytic, Susceptibility To, 1
ANXA2	Annexin A2
RPN1	Ribophorin I
SEPTIN9	Septin 9
CD177	CD177 Molecule
RELA	RELA Proto-Oncogene, NF-KB Subunit
MIR181B1	MicroRNA 181b-1
CFLAR	CASP8 And FADD Like Apoptosis Regulator
CD247	CD247 Molecule
LPL	Lipoprotein Lipase
TRAF3	TNF Receptor Associated Factor 3
SUMO1	Small Ubiquitin Like Modifier 1
JUNB	JunB Proto-Oncogene, AP-1 Transcription Factor Subunit
SQSTM1	Sequestosome 1
HLA-G	Major Histocompatibility Complex, Class I, G
IFNB1	Interferon Beta 1
PTHLH	Parathyroid Hormone Like Hormone
IRF2	Interferon Regulatory Factor 2
TYMS	Thymidylate Synthetase
CDC25A	Cell Division Cycle 25A
RARG	Retinoic Acid Receptor Gamma
CFTR	CF Transmembrane Conductance Regulator
DDX3X	DEAD-Box Helicase 3 X-Linked
PRDM2	PR/SET Domain 2
RPL18	Ribosomal Protein L18
RASA1	RAS P21 Protein Activator 1
SIN3A	SIN3 Transcription Regulator Family Member A
SLC19A1	Solute Carrier Family 19 Member 1
CD55	CD55 Molecule (Cromer Blood Group)
PTK2B	Protein Tyrosine Kinase 2 Beta
RPS15A	Ribosomal Protein S15a
KAT6B	Lysine Acetyltransferase 6B
MIR152	MicroRNA 152
GAB2	GRB2 Associated Binding Protein 2
TREM2	Triggering Receptor Expressed On Myeloid Cells 2
TREM1	Triggering Receptor Expressed On Myeloid Cells 1
ETS2	ETS Proto-Oncogene 2, Transcription Factor
SP140	SP140 Nuclear Body Protein
CXCL10	C-X-C Motif Chemokine Ligand 10
LOC107963948	BCR-ABL Micro-Breakpoint Cluster Region
BMP6	Bone Morphogenetic Protein 6
PDCD1	Programmed Cell Death 1
BCL11B	BAF Chromatin Remodeling Complex Subunit BCL11B
TRIB1	Tribbles Pseudokinase 1
IL1R1	Interleukin 1 Receptor Type 1
TNFRSF1B	TNF Receptor Superfamily Member 1B
LOC110806263	TERT 5' Regulatory Region
ID1	Inhibitor Of DNA Binding 1, HLH Protein
FCGR2B	Fc Fragment Of IgG Receptor IIb
RAD51C	RAD51 Paralog C
SELE	Selectin E
ARHGEF12	Rho Guanine Nucleotide Exchange Factor 12
NFE2	Nuclear Factor, Erythroid 2
SUFU	SUFU Negative Regulator Of Hedgehog Signaling
PTK2	Protein Tyrosine Kinase 2
RNASEH2B	Ribonuclease H2 Subunit B
SMARCA4	SWI/SNF Related, Matrix Associated, Actin Dependent Regulator Of Chromatin, Subfamily A, Member 4
CRK	CRK Proto-Oncogene, Adaptor Protein
HDAC3	Histone Deacetylase 3
SIRPA	Signal Regulatory Protein Alpha
H2AX	H2A.X Variant Histone
STMN1	Stathmin 1
IGF2	Insulin Like Growth Factor 2
SIPA1	Signal-Induced Proliferation-Associated 1
NFKB1	Nuclear Factor Kappa B Subunit 1
CEACAM8	CEA Cell Adhesion Molecule 8
NOTCH3	Notch Receptor 3
ERBB4	Erb-B2 Receptor Tyrosine Kinase 4
FGFR3	Fibroblast Growth Factor Receptor 3
RNASEH2C	Ribonuclease H2 Subunit C
RPL35	Ribosomal Protein L35
MMP1	Matrix Metallopeptidase 1
PTPN1	Protein Tyrosine Phosphatase Non-Receptor Type 1
MGMT	O-6-Methylguanine-DNA Methyltransferase
BUB3	BUB3 Mitotic Checkpoint Protein
ANGPT1	Angiopoietin 1
NCOA3	Nuclear Receptor Coactivator 3
TGM2	Transglutaminase 2
CD59	CD59 Molecule (CD59 Blood Group)
ABO	ABO, Alpha 1-3-N-Acetylgalactosaminyltransferase And Alpha 1-3-Galactosyltransferase
IGF1	Insulin Like Growth Factor 1
SALL4	Spalt Like Transcription Factor 4
FANCF	FA Complementation Group F
STIL	STIL Centriolar Assembly Protein
ACP5	Acid Phosphatase 5, Tartrate Resistant
NSUN2	NOP2/Sun RNA Methyltransferase 2
FANCE	FA Complementation Group E
WRAP53	WD Repeat Containing Antisense To TP53
RPL27	Ribosomal Protein L27
PLCG2	Phospholipase C Gamma 2
TNFSF13B	TNF Superfamily Member 13b
CRABP1	Cellular Retinoic Acid Binding Protein 1
FANCL	FA Complementation Group L
WIF1	WNT Inhibitory Factor 1
CD52	CD52 Molecule
BCL11A	BAF Chromatin Remodeling Complex Subunit BCL11A
MUC1	Mucin 1, Cell Surface Associated
SMAD3	SMAD Family Member 3
STK11	Serine/Threonine Kinase 11
BCL3	BCL3 Transcription Coactivator
F13A1	Coagulation Factor XIII A Chain
DGKE	Diacylglycerol Kinase Epsilon
TNFAIP2	TNF Alpha Induced Protein 2
LPIN1	Lipin 1
DOK1	Docking Protein 1
TNFRSF11B	TNF Receptor Superfamily Member 11b
UBA7	Ubiquitin Like Modifier Activating Enzyme 7
VCAM1	Vascular Cell Adhesion Molecule 1
BUB1	BUB1 Mitotic Checkpoint Serine/Threonine Kinase
LOC106992256	T(11;20)(P15;Q11) Topoisomerase (DNA) I Recombination Region
PRDX3	Peroxiredoxin 3
BTG1	BTG Anti-Proliferation Factor 1
STAT2	Signal Transducer And Activator Of Transcription 2
MTAP	Methylthioadenosine Phosphorylase
CYP26A1	Cytochrome P450 Family 26 Subfamily A Member 1
FLVCR1	FLVCR Heme Transporter 1
MBL2	Mannose Binding Lectin 2
FHL2	Four And A Half LIM Domains 2
NR3C1	Nuclear Receptor Subfamily 3 Group C Member 1
THRA	Thyroid Hormone Receptor Alpha
ADAR	Adenosine Deaminase RNA Specific
PXN	Paxillin
ATG7	Autophagy Related 7
PCGF2	Polycomb Group Ring Finger 2
TRIP13	Thyroid Hormone Receptor Interactor 13
NOS2	Nitric Oxide Synthase 2
CEP57	Centrosomal Protein 57
CD69	CD69 Molecule
PTPN22	Protein Tyrosine Phosphatase Non-Receptor Type 22
EIF2AK3	Eukaryotic Translation Initiation Factor 2 Alpha Kinase 3
FUS	FUS RNA Binding Protein
ALOX5	Arachidonate 5-Lipoxygenase
TSC2	TSC Complex Subunit 2
IL9	Interleukin 9
MIR342	MicroRNA 342
ZMYM2	Zinc Finger MYM-Type Containing 2
SERPINA1	Serpin Family A Member 1
CFB	Complement Factor B
MIR134	MicroRNA 134
CYP3A5	Cytochrome P450 Family 3 Subfamily A Member 5
FANCM	FA Complementation Group M
CPSF6	Cleavage And Polyadenylation Specific Factor 6
GP1BA	Glycoprotein Ib Platelet Subunit Alpha
MT-CO1	Mitochondrially Encoded Cytochrome C Oxidase I
PTGS1	Prostaglandin-Endoperoxide Synthase 1
SP100	SP100 Nuclear Antigen
PRDX4	Peroxiredoxin 4
RBP1	Retinol Binding Protein 1
DPM1	Dolichyl-Phosphate Mannosyltransferase Subunit 1, Catalytic
LY6E	Lymphocyte Antigen 6 Family Member E
TRB	T Cell Receptor Beta Locus
FANCI	FA Complementation Group I
NFIA	Nuclear Factor I A
CRABP2	Cellular Retinoic Acid Binding Protein 2
HOXA-AS2	HOXA Cluster Antisense RNA 2
HMGB1	High Mobility Group Box 1
NRP1	Neuropilin 1
S100A10	S100 Calcium Binding Protein A10
IKBKB	Inhibitor Of Nuclear Factor Kappa B Kinase Subunit Beta
DDX58	DExD/H-Box Helicase 58
TCTA	T Cell Leukemia Translocation Altered
RPL22	Ribosomal Protein L22
CYP2E1	Cytochrome P450 Family 2 Subfamily E Member 1
SCLL	Chromosome 8p11 Myeloproliferative Syndrome
CISH	Cytokine Inducible SH2 Containing Protein
BACH2	BTB Domain And CNC Homolog 2
PTX3	Pentraxin 3
PIGL	Phosphatidylinositol Glycan Anchor Biosynthesis Class L
ISG15	ISG15 Ubiquitin Like Modifier
CAV1	Caveolin 1
PCBP2	Poly(RC) Binding Protein 2
USP18	Ubiquitin Specific Peptidase 18
AQP9	Aquaporin 9
TCN1	Transcobalamin 1
DLEU1	Deleted In Lymphocytic Leukemia 1
MIR19B1	MicroRNA 19b-1
NOTCH2	Notch Receptor 2
CARD11	Caspase Recruitment Domain Family Member 11
PIP4K2A	Phosphatidylinositol-5-Phosphate 4-Kinase Type 2 Alpha
IGFBP2	Insulin Like Growth Factor Binding Protein 2
TXN	Thioredoxin
TBK1	TANK Binding Kinase 1
FOXP1	Forkhead Box P1
EDN1	Endothelin 1
ZFP36L2	ZFP36 Ring Finger Protein Like 2
KLF1	Kruppel Like Factor 1
SLC20A2	Solute Carrier Family 20 Member 2
MIR224	MicroRNA 224
TIMP1	TIMP Metallopeptidase Inhibitor 1
TLR7	Toll Like Receptor 7
TYK2	Tyrosine Kinase 2
BAD	BCL2 Associated Agonist Of Cell Death
PHF8	PHD Finger Protein 8
FPGS	Folylpolyglutamate Synthase
PLCB1	Phospholipase C Beta 1
NT5C2	5'-Nucleotidase, Cytosolic II
IL2RB	Interleukin 2 Receptor Subunit Beta
IFIT3	Interferon Induced Protein With Tetratricopeptide Repeats 3
MIR382	MicroRNA 382
CCL11	C-C Motif Chemokine Ligand 11
MIRLET7A1	MicroRNA Let-7a-1
PIK3C2A	Phosphatidylinositol-4-Phosphate 3-Kinase Catalytic Subunit Type 2 Alpha
HBG1	Hemoglobin Subunit Gamma 1
TEK	TEK Receptor Tyrosine Kinase
TNFRSF13B	TNF Receptor Superfamily Member 13B
GADD45A	Growth Arrest And DNA Damage Inducible Alpha
TCL1B	TCL1 Family AKT Coactivator B
ABCC5	ATP Binding Cassette Subfamily C Member 5
NKG7	Natural Killer Cell Granule Protein 7
CBS	Cystathionine Beta-Synthase
F7	Coagulation Factor VII
RHOA	Ras Homolog Family Member A
BLNK	B Cell Linker
FANCB	FA Complementation Group B
HMHB1	Histocompatibility Minor HB-1
ASNS	Asparagine Synthetase (Glutamine-Hydrolyzing)
BAK1	BCL2 Antagonist/Killer 1
XBP1	X-Box Binding Protein 1
PNP	Purine Nucleoside Phosphorylase
SRF	Serum Response Factor
COL3A1	Collagen Type III Alpha 1 Chain
ABCC4	ATP Binding Cassette Subfamily C Member 4
ELF4	E74 Like ETS Transcription Factor 4
ATR	ATR Serine/Threonine Kinase
AURKA	Aurora Kinase A
FLNA	Filamin A
ANGPT2	Angiopoietin 2
CD27	CD27 Molecule
S100B	S100 Calcium Binding Protein B
CXCR5	C-X-C Motif Chemokine Receptor 5
XRCC5	X-Ray Repair Cross Complementing 5
BRIP1	BRCA1 Interacting Protein C-Terminal Helicase 1
ADAMTSL1	ADAMTS Like 1
HULC	Hepatocellular Carcinoma Up-Regulated Long Non-Coding RNA
AFF3	AF4/FMR2 Family Member 3
VIM	Vimentin
FBL	Fibrillarin
CAB39L	Calcium Binding Protein 39 Like
CD9	CD9 Molecule
MIR100HG	Mir-100-Let-7a-2-Mir-125b-1 Cluster Host Gene
HLA-DPA1	Major Histocompatibility Complex, Class II, DP Alpha 1
MTR	5-Methyltetrahydrofolate-Homocysteine Methyltransferase
LOC107963955	BCR-ABL Major-Breakpoint Cluster Region
MMP2	Matrix Metallopeptidase 2
PSMB9	Proteasome 20S Subunit Beta 9
RTEL1-TNFRSF6B	RTEL1-TNFRSF6B Readthrough (NMD Candidate)
MIR202	MicroRNA 202
MAP2K2	Mitogen-Activated Protein Kinase Kinase 2
CD68	CD68 Molecule
CCNC	Cyclin C
ABI1	Abl Interactor 1
KBTBD11	Kelch Repeat And BTB Domain Containing 11
FLVCR2	FLVCR Heme Transporter 2
ACSL6	Acyl-CoA Synthetase Long Chain Family Member 6
CTF1	Cardiotrophin 1
SDC1	Syndecan 1
BGLT3	Beta Globin Locus Transcript 3
PURB	Purine Rich Element Binding Protein B
SLX4	SLX4 Structure-Specific Endonuclease Subunit
SLC2A1	Solute Carrier Family 2 Member 1
MRE11	MRE11 Homolog, Double Strand Break Repair Nuclease
ITGA5	Integrin Subunit Alpha 5
CALCA	Calcitonin Related Polypeptide Alpha
MB	Myoglobin
FADD	Fas Associated Via Death Domain
CLLU1	Chronic Lymphocytic Leukemia Up-Regulated 1
XDH	Xanthine Dehydrogenase
LOC107133509	NUP98-NSD3 Recombination Region
PPBP	Pro-Platelet Basic Protein
HMMR	Hyaluronan Mediated Motility Receptor
ABCC3	ATP Binding Cassette Subfamily C Member 3
CCR4	C-C Motif Chemokine Receptor 4
CADM1	Cell Adhesion Molecule 1
SLC29A1	Solute Carrier Family 29 Member 1 (Augustine Blood Group)
GGT1	Gamma-Glutamyltransferase 1
BST2	Bone Marrow Stromal Cell Antigen 2
CNTRL	Centriolin
HLA-DQB1	Major Histocompatibility Complex, Class II, DQ Beta 1
HES1	Hes Family BHLH Transcription Factor 1
NOD2	Nucleotide Binding Oligomerization Domain Containing 2
RNASEH2A	Ribonuclease H2 Subunit A
CTNNA1	Catenin Alpha 1
ERCC4	ERCC Excision Repair 4, Endonuclease Catalytic Subunit
P2RX7	Purinergic Receptor P2X 7
MDM4	MDM4 Regulator Of P53
HMGA2	High Mobility Group AT-Hook 2
HAMP	Hepcidin Antimicrobial Peptide
PECAM1	Platelet And Endothelial Cell Adhesion Molecule 1
PRL	Prolactin
PSTPIP1	Proline-Serine-Threonine Phosphatase Interacting Protein 1
SLC20A1	Solute Carrier Family 20 Member 1
PGF	Placental Growth Factor
IL18R1	Interleukin 18 Receptor 1
ZFP36L1	ZFP36 Ring Finger Protein Like 1
HMOX1	Heme Oxygenase 1
MTCP1	Mature T Cell Proliferation 1
NALT1	NOTCH1 Associated LncRNA In T Cell Acute Lymphoblastic Leukemia 1
BDNF	Brain Derived Neurotrophic Factor
FCER2	Fc Fragment Of IgE Receptor II
MS4A1	Membrane Spanning 4-Domains A1
ERCC1	ERCC Excision Repair 1, Endonuclease Non-Catalytic Subunit
ACE	Angiotensin I Converting Enzyme
SOD1	Superoxide Dismutase 1
ADRB2	Adrenoceptor Beta 2
MSI2	Musashi RNA Binding Protein 2
CEACAM6	CEA Cell Adhesion Molecule 6
CFHR1	Complement Factor H Related 1
TLE1	TLE Family Member 1, Transcriptional Corepressor
TCL6	T Cell Leukemia/Lymphoma 6
TNFRSF13C	TNF Receptor Superfamily Member 13C
CFHR5	Complement Factor H Related 5
ENO2	Enolase 2
IKBKG	Inhibitor Of Nuclear Factor Kappa B Kinase Regulatory Subunit Gamma
FTO	FTO Alpha-Ketoglutarate Dependent Dioxygenase
BCL9	BCL9 Transcription Coactivator
MLLT6	MLLT6, PHD Finger Containing
THBS1	Thrombospondin 1
CD58	CD58 Molecule
MIR196B	MicroRNA 196b
UBE2T	Ubiquitin Conjugating Enzyme E2 T
KMT2B	Lysine Methyltransferase 2B
MICA	MHC Class I Polypeptide-Related Sequence A
NT5E	5'-Nucleotidase Ecto
ACP1	Acid Phosphatase 1
IL2RG	Interleukin 2 Receptor Subunit Gamma
TNFSF11	TNF Superfamily Member 11
F2R	Coagulation Factor II Thrombin Receptor
CX3CR1	C-X3-C Motif Chemokine Receptor 1
C5	Complement C5
IL11RA	Interleukin 11 Receptor Subunit Alpha
TNFRSF17	TNF Receptor Superfamily Member 17
DOCK8	Dedicator Of Cytokinesis 8
GGH	Gamma-Glutamyl Hydrolase
MIAT	Myocardial Infarction Associated Transcript
FGFR1OP2	FGFR1 Oncogene Partner 2
CFHR3	Complement Factor H Related 3
SST	Somatostatin
MIR100	MicroRNA 100
DCLRE1C	DNA Cross-Link Repair 1C
MIR10B	MicroRNA 10b
KDM6B	Lysine Demethylase 6B
MIR143	MicroRNA 143
XRCC6	X-Ray Repair Cross Complementing 6
TF	Transferrin
CD209	CD209 Molecule
SHH	Sonic Hedgehog Signaling Molecule
ZCCHC8	Zinc Finger CCHC-Type Containing 8
TNFSF8	TNF Superfamily Member 8
CXCR3	C-X-C Motif Chemokine Receptor 3
CCR9	C-C Motif Chemokine Receptor 9
INS	Insulin
CCDC28A	Coiled-Coil Domain Containing 28A
FOLR2	Folate Receptor Beta
IGFBP3	Insulin Like Growth Factor Binding Protein 3
POT1	Protection Of Telomeres 1
REL	REL Proto-Oncogene, NF-KB Subunit
HOXD4	Homeobox D4
SPP1	Secreted Phosphoprotein 1
POLR1D	RNA Polymerase I And III Subunit D
ETNK1	Ethanolamine Kinase 1
AKT2	AKT Serine/Threonine Kinase 2
MAFB	MAF BZIP Transcription Factor B
MIR30B	MicroRNA 30b
MIR149	MicroRNA 149
APOH	Apolipoprotein H
GLS	Glutaminase
ARID1A	AT-Rich Interaction Domain 1A
FGA	Fibrinogen Alpha Chain
TLR1	Toll Like Receptor 1
SLPI	Secretory Leukocyte Peptidase Inhibitor
NSD3	Nuclear Receptor Binding SET Domain Protein 3
TGFB2	Transforming Growth Factor Beta 2
DDX10	DEAD-Box Helicase 10
ITK	IL2 Inducible T Cell Kinase
CNTN2	Contactin 2
PLG	Plasminogen
NUDC	Nuclear Distribution C, Dynein Complex Regulator
RPS27A	Ribosomal Protein S27a
BGLAP	Bone Gamma-Carboxyglutamate Protein
TLR6	Toll Like Receptor 6
PBX4	PBX Homeobox 4
AUTS2	Activator Of Transcription And Developmental Regulator AUTS2
CEP43	Centrosomal Protein 43
GAS5	Growth Arrest Specific 5
HOXD13	Homeobox D13
LOC107963951	BCR-ABL Minor-Breakpoint Cluster Region
ASXL2	ASXL Transcriptional Regulator 2
APP	Amyloid Beta Precursor Protein
S100A8	S100 Calcium Binding Protein A8
RPL6	Ribosomal Protein L6
TP53BP1	Tumor Protein P53 Binding Protein 1
TRIM13	Tripartite Motif Containing 13
KMT2E	Lysine Methyltransferase 2E (Inactive)
MTHFD1	Methylenetetrahydrofolate Dehydrogenase, Cyclohydrolase And Formyltetrahydrofolate Synthetase 1
IDO1	Indoleamine 2,3-Dioxygenase 1
IRF7	Interferon Regulatory Factor 7
CRTC2	CREB Regulated Transcription Coactivator 2
TSPAN7	Tetraspanin 7
RPL29	Ribosomal Protein L29
PBXIP1	PBX Homeobox Interacting Protein 1
EVC	EvC Ciliary Complex Subunit 1
SFTPC	Surfactant Protein C
MIF	Macrophage Migration Inhibitory Factor
EIF6	Eukaryotic Translation Initiation Factor 6
CCNB1	Cyclin B1
MLSM7	Myelodysplasia And Leukemia Syndrome With Monosomy 7
XRCC3	X-Ray Repair Cross Complementing 3
CD63	CD63 Molecule
NDUFA1	NADH:Ubiquinone Oxidoreductase Subunit A1
CCL19	C-C Motif Chemokine Ligand 19
LY96	Lymphocyte Antigen 96
RNASE3	Ribonuclease A Family Member 3
PURA	Purine Rich Element Binding Protein A
RPS25	Ribosomal Protein S25
TRMU	TRNA 5-Methylaminomethyl-2-Thiouridylate Methyltransferase
AK2	Adenylate Kinase 2
DLK1	Delta Like Non-Canonical Notch Ligand 1
PRKCB	Protein Kinase C Beta
UTP4	UTP4 Small Subunit Processome Component
XRCC2	X-Ray Repair Cross Complementing 2
IL4R	Interleukin 4 Receptor
MUTYH	MutY DNA Glycosylase
LOC108449888	PATRR22 Recombination Region
LOC108449897	PATRR11 Recombination Region
TRAF6	TNF Receptor Associated Factor 6
NGF	Nerve Growth Factor
BCL2L10	BCL2 Like 10
BOK	BCL2 Family Apoptosis Regulator BOK
ALDH2	Aldehyde Dehydrogenase 2 Family Member
HBZ	Hemoglobin Subunit Zeta
ZNF384	Zinc Finger Protein 384
NBAS	NBAS Subunit Of NRZ Tethering Complex
CTC1	CST Telomere Replication Complex Component 1
VPREB1	V-Set Pre-B Cell Surrogate Light Chain 1
CD163	CD163 Molecule
S100A9	S100 Calcium Binding Protein A9
GLI2	GLI Family Zinc Finger 2
CRBN	Cereblon
MET	MET Proto-Oncogene, Receptor Tyrosine Kinase
CYLD	CYLD Lysine 63 Deubiquitinase
F10	Coagulation Factor X
XPC	XPC Complex Subunit, DNA Damage Recognition And Repair Factor
FOXM1	Forkhead Box M1
EIF2AK2	Eukaryotic Translation Initiation Factor 2 Alpha Kinase 2
GSK3B	Glycogen Synthase Kinase 3 Beta
APEX1	Apurinic/Apyrimidinic Endodeoxyribonuclease 1
DBA2	Diamond-Blackfan Anemia 2
EVC2	EvC Ciliary Complex Subunit 2
STS	Steroid Sulfatase
MAD2L2	Mitotic Arrest Deficient 2 Like 2
HEPACAM2	HEPACAM Family Member 2
LIG1	DNA Ligase 1
OLIG2	Oligodendrocyte Transcription Factor 2
HELLS	Helicase, Lymphoid Specific
POMC	Proopiomelanocortin
RAD50	RAD50 Double Strand Break Repair Protein
NPPB	Natriuretic Peptide B
C1GALT1C1	C1GALT1 Specific Chaperone 1
CDX2	Caudal Type Homeobox 2
HDAC4	Histone Deacetylase 4
LOC107197952	NUP98-HOXA9 Recombination Region
OSM	Oncostatin M
TERF1	Telomeric Repeat Binding Factor 1
MIR93	MicroRNA 93
TERF2	Telomeric Repeat Binding Factor 2
TRA	T Cell Receptor Alpha Locus
MIR17HG	MiR-17-92a-1 Cluster Host Gene
MAPK10	Mitogen-Activated Protein Kinase 10
PRKDC	Protein Kinase, DNA-Activated, Catalytic Subunit
GFAP	Glial Fibrillary Acidic Protein
F9	Coagulation Factor IX
RPL38	Ribosomal Protein L38
MIR186	MicroRNA 186
RAC2	Rac Family Small GTPase 2
ETS1	ETS Proto-Oncogene 1, Transcription Factor
CP	Ceruloplasmin
TGFBR2	Transforming Growth Factor Beta Receptor 2
HSF2	Heat Shock Transcription Factor 2
BARD1	BRCA1 Associated RING Domain 1
ADIPOQ	Adiponectin, C1Q And Collagen Domain Containing
MUS81	MUS81 Structure-Specific Endonuclease Subunit
SOX4	SRY-Box Transcription Factor 4
CASP1	Caspase 1
JMJD1C	Jumonji Domain Containing 1C
RPS20	Ribosomal Protein S20
NFKB2	Nuclear Factor Kappa B Subunit 2
JAG1	Jagged Canonical Notch Ligand 1
REN	Renin
STAR	Steroidogenic Acute Regulatory Protein
SRP72	Signal Recognition Particle 72
BID	BH3 Interacting Domain Death Agonist
RPL3	Ribosomal Protein L3
ASPG	Asparaginase
DDB2	Damage Specific DNA Binding Protein 2
ID2	Inhibitor Of DNA Binding 2
RPS6	Ribosomal Protein S6
AKT3	AKT Serine/Threonine Kinase 3
LBP	Lipopolysaccharide Binding Protein
TGFBR1	Transforming Growth Factor Beta Receptor 1
MCAM	Melanoma Cell Adhesion Molecule
CYP2C19	Cytochrome P450 Family 2 Subfamily C Member 19
BCL2A1	BCL2 Related Protein A1
SMO	Smoothened, Frizzled Class Receptor
PMP22	Peripheral Myelin Protein 22
MIR708	MicroRNA 708
LEP	Leptin
BRWD3	Bromodomain And WD Repeat Domain Containing 3
LTV1	LTV1 Ribosome Biogenesis Factor
VTN	Vitronectin
PRPF8	Pre-MRNA Processing Factor 8
PTH	Parathyroid Hormone
NOS3	Nitric Oxide Synthase 3
CLEC7A	C-Type Lectin Domain Containing 7A
CDH2	Cadherin 2
LDB1	LIM Domain Binding 1
PCNA	Proliferating Cell Nuclear Antigen
MT-CO3	Mitochondrially Encoded Cytochrome C Oxidase III
CYSLTR1	Cysteinyl Leukotriene Receptor 1
CHD4	Chromodomain Helicase DNA Binding Protein 4
PLCG1	Phospholipase C Gamma 1
DKK1	Dickkopf WNT Signaling Pathway Inhibitor 1
SCGB1A1	Secretoglobin Family 1A Member 1
SELPLG	Selectin P Ligand
IL1RAPL2	Interleukin 1 Receptor Accessory Protein Like 2
GPHN	Gephyrin
PSMB8	Proteasome 20S Subunit Beta 8
SPARC	Secreted Protein Acidic And Cysteine Rich
LZTR1	Leucine Zipper Like Transcription Regulator 1
F8	Coagulation Factor VIII
IGHE	Immunoglobulin Heavy Constant Epsilon
PDGFB	Platelet Derived Growth Factor Subunit B
DGUOK	Deoxyguanosine Kinase
NMD3	NMD3 Ribosome Export Adaptor
IER3	Immediate Early Response 3
JAGN1	Jagunal Homolog 1
PSEN1	Presenilin 1
NPPA	Natriuretic Peptide A
RPSA	Ribosomal Protein SA
HPSE	Heparanase
MEF2C	Myocyte Enhancer Factor 2C
FGF1	Fibroblast Growth Factor 1
TREX1	Three Prime Repair Exonuclease 1
NTF3	Neurotrophin 3
XPR1	Xenotropic And Polytropic Retrovirus Receptor 1
TREML1	Triggering Receptor Expressed On Myeloid Cells Like 1
MIR32	MicroRNA 32
PLD3	Phospholipase D Family Member 3
MBTD1	Mbt Domain Containing 1
TSC1	TSC Complex Subunit 1
CAMP	Cathelicidin Antimicrobial Peptide
PTCH2	Patched 2
PTPRT	Protein Tyrosine Phosphatase Receptor Type T
HIC1	HIC ZBTB Transcriptional Repressor 1
XPA	XPA, DNA Damage Recognition And Repair Factor
CDK6-AS1	CDK6 Antisense RNA 1
SAMD9	Sterile Alpha Motif Domain Containing 9
AFF4	AF4/FMR2 Family Member 4
PIM2	Pim-2 Proto-Oncogene, Serine/Threonine Kinase
DYNC2LI1	Dynein Cytoplasmic 2 Light Intermediate Chain 1
CST3	Cystatin C
LACTB	Lactamase Beta
AHI1	Abelson Helper Integration Site 1
NGFR	Nerve Growth Factor Receptor
RAG2	Recombination Activating 2
CYP2D6	Cytochrome P450 Family 2 Subfamily D Member 6
SCYL1	SCY1 Like Pseudokinase 1
H3C1	H3 Clustered Histone 1
RTN4R	Reticulon 4 Receptor
GLI3	GLI Family Zinc Finger 3
IL15RA	Interleukin 15 Receptor Subunit Alpha
LIG3	DNA Ligase 3
CD200	CD200 Molecule
ARHGAP45	Rho GTPase Activating Protein 45
NPTN	Neuroplastin
ODC1	Ornithine Decarboxylase 1
HBB-LCR	Beta-Globin Locus Control Region
TNFRSF4	TNF Receptor Superfamily Member 4
ACHE	Acetylcholinesterase (Cartwright Blood Group)
RSL24D1	Ribosomal L24 Domain Containing 1
PBX2	PBX Homeobox 2
CCL17	C-C Motif Chemokine Ligand 17
RFWD3	Ring Finger And WD Repeat Domain 3
EPHB2	EPH Receptor B2
IRS1	Insulin Receptor Substrate 1
SERPINB1	Serpin Family B Member 1
ANKS1B	Ankyrin Repeat And Sterile Alpha Motif Domain Containing 1B
SP1	Sp1 Transcription Factor
TCF12	Transcription Factor 12
CXCR2	C-X-C Motif Chemokine Receptor 2
TOPBP1	DNA Topoisomerase II Binding Protein 1
MIR135A1	MicroRNA 135a-1
NGDN	Neuroguidin
MIR25	MicroRNA 25
GP9	Glycoprotein IX Platelet
SSX2IP	SSX Family Member 2 Interacting Protein
BCHE	Butyrylcholinesterase
WNT5A	Wnt Family Member 5A
TAP2	Transporter 2, ATP Binding Cassette Subfamily B Member
NHEJ1	Non-Homologous End Joining Factor 1
ACTC1	Actin Alpha Cardiac Muscle 1
PTPRJ	Protein Tyrosine Phosphatase Receptor Type J
CIITA	Class II Major Histocompatibility Complex Transactivator
TBX21	T-Box Transcription Factor 21
ITGA2	Integrin Subunit Alpha 2
AICDA	Activation Induced Cytidine Deaminase
DAXX	Death Domain Associated Protein
NSMCE2	NSE2 (MMS21) Homolog, SMC5-SMC6 Complex SUMO Ligase
PREB	Prolactin Regulatory Element Binding
ORM1	Orosomucoid 1
PIK3CB	Phosphatidylinositol-4,5-Bisphosphate 3-Kinase Catalytic Subunit Beta
LINC00449	Long Intergenic Non-Protein Coding RNA 449
NLRP12	NLR Family Pyrin Domain Containing 12
BBC3	BCL2 Binding Component 3
ENSG00000228778
E2F2	E2F Transcription Factor 2
SEPTIN6	Septin 6
TRIM24	Tripartite Motif Containing 24
UNC93B1	Unc-93 Homolog B1, TLR Signaling Regulator
LCP1	Lymphocyte Cytosolic Protein 1
PTPN2	Protein Tyrosine Phosphatase Non-Receptor Type 2
XIST	X Inactive Specific Transcript
NES	Nestin
POU2F1	POU Class 2 Homeobox 1
SLC25A37	Solute Carrier Family 25 Member 37
IGLL5	Immunoglobulin Lambda Like Polypeptide 5
DAB2IP	DAB2 Interacting Protein
PSIP1	PC4 And SFRS1 Interacting Protein 1
TAP1	Transporter 1, ATP Binding Cassette Subfamily B Member
CPT2	Carnitine Palmitoyltransferase 2
HSPA5	Heat Shock Protein Family A (Hsp70) Member 5
ACTN1	Actinin Alpha 1
ITPA	Inosine Triphosphatase
PRKN	Parkin RBR E3 Ubiquitin Protein Ligase
MT-ND2	Mitochondrially Encoded NADH:Ubiquinone Oxidoreductase Core Subunit 2
DLL1	Delta Like Canonical Notch Ligand 1
HNRNPH1	Heterogeneous Nuclear Ribonucleoprotein H1
ENTPD1	Ectonucleoside Triphosphate Diphosphohydrolase 1
RASGRP1	RAS Guanyl Releasing Protein 1
ITIH4	Inter-Alpha-Trypsin Inhibitor Heavy Chain 4
KAT7	Lysine Acetyltransferase 7
SFTPB	Surfactant Protein B
ALAD	Aminolevulinate Dehydratase
TICAM1	Toll Like Receptor Adaptor Molecule 1
MIR612	MicroRNA 612
PHLDB1	Pleckstrin Homology Like Domain Family B Member 1
GDF15	Growth Differentiation Factor 15
RASSF1	Ras Association Domain Family Member 1
AGER	Advanced Glycosylation End-Product Specific Receptor
SFTPD	Surfactant Protein D
CDC23	Cell Division Cycle 23
RELB	RELB Proto-Oncogene, NF-KB Subunit
MYO18A	Myosin XVIIIA
FECH	Ferrochelatase
LHX1	LIM Homeobox 1
HNF1A	HNF1 Homeobox A
SMARCA5	SWI/SNF Related, Matrix Associated, Actin Dependent Regulator Of Chromatin, Subfamily A, Member 5
RPS18	Ribosomal Protein S18
PDE4A	Phosphodiesterase 4A
ITGAD	Integrin Subunit Alpha D
CDC42	Cell Division Cycle 42
SMARCD2	SWI/SNF Related, Matrix Associated, Actin Dependent Regulator Of Chromatin, Subfamily D, Member 2
TGFA	Transforming Growth Factor Alpha
NOX4	NADPH Oxidase 4
GP6	Glycoprotein VI Platelet
TNFSF4	TNF Superfamily Member 4
YAP1	Yes1 Associated Transcriptional Regulator
DIPK1A	Divergent Protein Kinase Domain 1A
JUND	JunD Proto-Oncogene, AP-1 Transcription Factor Subunit
MVK	Mevalonate Kinase
TIMP3	TIMP Metallopeptidase Inhibitor 3
CD70	CD70 Molecule
AMLCR2	Acute Myeloid Leukemia Chromosome Region 2
IL17F	Interleukin 17F
MRTO4	MRT4 Homolog, Ribosome Maturation Factor
NOP56	NOP56 Ribonucleoprotein
DMD	Dystrophin
EPHX1	Epoxide Hydrolase 1
ERN1	Endoplasmic Reticulum To Nucleus Signaling 1
LOC107126359	NUP98-HOXD13 Recombination Region
SYP	Synaptophysin
SKP1	S-Phase Kinase Associated Protein 1
FOXG1	Forkhead Box G1
HNF4A	Hepatocyte Nuclear Factor 4 Alpha
MYH9	Myosin Heavy Chain 9
SOD2	Superoxide Dismutase 2
LGALS3	Galectin 3
LSG1	Large 60S Subunit Nuclear Export GTPase 1
SFRP1	Secreted Frizzled Related Protein 1
RNF168	Ring Finger Protein 168
MYOM2	Myomesin 2
MPIG6B	Megakaryocyte And Platelet Inhibitory Receptor G6b
IFI27	Interferon Alpha Inducible Protein 27
USB1	U6 SnRNA Biogenesis Phosphodiesterase 1
SKIV2L	Ski2 Like RNA Helicase
SAA1	Serum Amyloid A1
HOXB3	Homeobox B3
S100A6	S100 Calcium Binding Protein A6
CTSB	Cathepsin B
LAIR1	Leukocyte Associated Immunoglobulin Like Receptor 1
FEN1	Flap Structure-Specific Endonuclease 1
ABCB4	ATP Binding Cassette Subfamily B Member 4
PIR	Pirin
DPF2	Double PHD Fingers 2
CYP1B1	Cytochrome P450 Family 1 Subfamily B Member 1
ALOX12	Arachidonate 12-Lipoxygenase, 12S Type
USP7	Ubiquitin Specific Peptidase 7
NFATC2	Nuclear Factor Of Activated T Cells 2
SDHD	Succinate Dehydrogenase Complex Subunit D
TTN	Titin
MIR124-1	MicroRNA 124-1
CHAT	Choline O-Acetyltransferase
VHL	Von Hippel-Lindau Tumor Suppressor
MDS2	Myelodysplastic Syndrome 2 Translocation Associated
AIF1	Allograft Inflammatory Factor 1
GPR183	G Protein-Coupled Receptor 183
RPL19	Ribosomal Protein L19
TPR	Translocated Promoter Region, Nuclear Basket Protein
PIGH	Phosphatidylinositol Glycan Anchor Biosynthesis Class H
CUL1	Cullin 1
ESR2	Estrogen Receptor 2
VEGFC	Vascular Endothelial Growth Factor C
IL1RAP	Interleukin 1 Receptor Accessory Protein
PTK7	Protein Tyrosine Kinase 7 (Inactive)
HLA-DQA1	Major Histocompatibility Complex, Class II, DQ Alpha 1
PBX3	PBX Homeobox 3
CCL22	C-C Motif Chemokine Ligand 22
KIAA0100	KIAA0100
LOC107126288	NUP98-HOXA13 Recombination Region
EIF2AK1	Eukaryotic Translation Initiation Factor 2 Alpha Kinase 1
MAF	MAF BZIP Transcription Factor
CLC	Charcot-Leyden Crystal Galectin
MMP3	Matrix Metallopeptidase 3
PIK3R2	Phosphoinositide-3-Kinase Regulatory Subunit 2
JUP	Junction Plakoglobin
CLU	Clusterin
TMEM127	Transmembrane Protein 127
ABCB7	ATP Binding Cassette Subfamily B Member 7
ADCY10	Adenylate Cyclase 10
CPB2	Carboxypeptidase B2
SFTPA2	Surfactant Protein A2
CXXC4	CXXC Finger Protein 4
IL23R	Interleukin 23 Receptor
TAC1	Tachykinin Precursor 1
RPF1	Ribosome Production Factor 1 Homolog
TLR8	Toll Like Receptor 8
GP1BB	Glycoprotein Ib Platelet Subunit Beta
RAD51D	RAD51 Paralog D
NIP7	Nucleolar Pre-RRNA Processing Protein NIP7
HDC	Histidine Decarboxylase
RPA2	Replication Protein A2
POLR1A	RNA Polymerase I Subunit A
F13B	Coagulation Factor XIII B Chain
TAF15	TATA-Box Binding Protein Associated Factor 15
RYK	Receptor Like Tyrosine Kinase
LTF	Lactotransferrin
PLA2G6	Phospholipase A2 Group VI
TUBB	Tubulin Beta Class I
E2F1	E2F Transcription Factor 1
PRDM1	PR/SET Domain 1
POLD3	DNA Polymerase Delta 3, Accessory Subunit
TIMP2	TIMP Metallopeptidase Inhibitor 2
VPS45	Vacuolar Protein Sorting 45 Homolog
ALOX5AP	Arachidonate 5-Lipoxygenase Activating Protein
MIR26A1	MicroRNA 26a-1
SOS2	SOS Ras/Rho Guanine Nucleotide Exchange Factor 2
CD1D	CD1d Molecule
SEPTIN5	Septin 5
MDC1	Mediator Of DNA Damage Checkpoint 1
CTBP1	C-Terminal Binding Protein 1
CPOX	Coproporphyrinogen Oxidase
TRIM5	Tripartite Motif Containing 5
SNHG4	Small Nucleolar RNA Host Gene 4
ATF4	Activating Transcription Factor 4
MMUT	Methylmalonyl-CoA Mutase
FTMT	Ferritin Mitochondrial
RASGRP4	RAS Guanyl Releasing Protein 4
DIMT1	DIMT1 RRNA Methyltransferase And Ribosome Maturation Factor
MIR29C	MicroRNA 29c
DES	Desmin
TREML2	Triggering Receptor Expressed On Myeloid Cells Like 2
SLFN14	Schlafen Family Member 14
WEE1	WEE1 G2 Checkpoint Kinase
CCL20	C-C Motif Chemokine Ligand 20
UROD	Uroporphyrinogen Decarboxylase
RHD	Rh Blood Group D Antigen
FKBP5	FKBP Prolyl Isomerase 5
ABCC2	ATP Binding Cassette Subfamily C Member 2
CARD9	Caspase Recruitment Domain Family Member 9
GRN	Granulin Precursor
CNOT3	CCR4-NOT Transcription Complex Subunit 3
APTX	Aprataxin
MCM2	Minichromosome Maintenance Complex Component 2
RAD51B	RAD51 Paralog B
CDC25C	Cell Division Cycle 25C
TFPT	TCF3 Fusion Partner
MIR92A1	MicroRNA 92a-1
HOXA@	Homeobox A Cluster
LOC107133517	NUP98-IQCG Recombination Region
RMI1	RecQ Mediated Genome Instability 1
HADHA	Hydroxyacyl-CoA Dehydrogenase Trifunctional Multienzyme Complex Subunit Alpha
IGFBP7	Insulin Like Growth Factor Binding Protein 7
CTRL	Chymotrypsin Like
MMP8	Matrix Metallopeptidase 8
PEG10	Paternally Expressed 10
MIR192	MicroRNA 192
MIR183	MicroRNA 183
MYOD1	Myogenic Differentiation 1
ROR1	Receptor Tyrosine Kinase Like Orphan Receptor 1
MAGEA3	MAGE Family Member A3
HHEX	Hematopoietically Expressed Homeobox
RNU12-2P	RNA, U12 Small Nuclear 2, Pseudogene
SNORA66	Small Nucleolar RNA, H/ACA Box 66
PAK1IP1	PAK1 Interacting Protein 1
BMP2	Bone Morphogenetic Protein 2
CNTF	Ciliary Neurotrophic Factor
POU4F1	POU Class 4 Homeobox 1
GCOM2	GRINL1B Complex Locus 2 (Pseudogene)
PPARA	Peroxisome Proliferator Activated Receptor Alpha
EPX	Eosinophil Peroxidase
ASAH1	N-Acylsphingosine Amidohydrolase 1
CR2	Complement C3d Receptor 2
IGF2R	Insulin Like Growth Factor 2 Receptor
VIPR1	Vasoactive Intestinal Peptide Receptor 1
TOP3A	DNA Topoisomerase III Alpha
UBASH3B	Ubiquitin Associated And SH3 Domain Containing B
RPLP1	Ribosomal Protein Lateral Stalk Subunit P1
TIA1	TIA1 Cytotoxic Granule Associated RNA Binding Protein
IL12B	Interleukin 12B
RECQL5	RecQ Like Helicase 5
MYH7B	Myosin Heavy Chain 7B
BLACE	B Cell Acute Lymphoblastic Leukemia Expressed
CXCL13	C-X-C Motif Chemokine Ligand 13
BRCC3	BRCA1/BRCA2-Containing Complex Subunit 3
TIRAP	TIR Domain Containing Adaptor Protein
DMBT1	Deleted In Malignant Brain Tumors 1
KANK1	KN Motif And Ankyrin Repeat Domains 1
LNP1	Leukemia NUP98 Fusion Partner 1
EZR	Ezrin
MIR375	MicroRNA 375
IRF9	Interferon Regulatory Factor 9
RMI2	RecQ Mediated Genome Instability 2
LOC107195252	NUP98-HHEX Recombination Region
CD200R1	CD200 Receptor 1
H3-3A	H3.3 Histone A
POLR3A	RNA Polymerase III Subunit A
ARID1B	AT-Rich Interaction Domain 1B
CCN1	Cellular Communication Network Factor 1
KDM3B	Lysine Demethylase 3B
CLEC5A	C-Type Lectin Domain Containing 5A
SOX9	SRY-Box Transcription Factor 9
MAPKAPK2	MAPK Activated Protein Kinase 2
BAG1	BAG Cochaperone 1
MCM7	Minichromosome Maintenance Complex Component 7
FAH	Fumarylacetoacetate Hydrolase
TPSAB1	Tryptase Alpha/Beta 1
SOX11	SRY-Box Transcription Factor 11
ABCA7	ATP Binding Cassette Subfamily A Member 7
IRAK4	Interleukin 1 Receptor Associated Kinase 4
PPM1D	Protein Phosphatase, Mg2+/Mn2+ Dependent 1D
ADAM10	ADAM Metallopeptidase Domain 10
HRX	Hyperreflexia
WNT1	Wnt Family Member 1
LARS1	Leucyl-TRNA Synthetase 1
SLC17A5	Solute Carrier Family 17 Member 5
REV1	REV1 DNA Directed Polymerase
HOXA11	Homeobox A11
MX1	MX Dynamin Like GTPase 1
SDHA	Succinate Dehydrogenase Complex Flavoprotein Subunit A
GSR	Glutathione-Disulfide Reductase
MAP2	Microtubule Associated Protein 2
TLX2	T Cell Leukemia Homeobox 2
MBP	Myelin Basic Protein
BPI	Bactericidal Permeability Increasing Protein
DLEU2	Deleted In Lymphocytic Leukemia 2
POLG	DNA Polymerase Gamma, Catalytic Subunit
CD84	CD84 Molecule
CCN2	Cellular Communication Network Factor 2
ATP7A	ATPase Copper Transporting Alpha
AP3B1	Adaptor Related Protein Complex 3 Subunit Beta 1
RIOK2	RIO Kinase 2
BYSL	Bystin Like
HLA-DRA	Major Histocompatibility Complex, Class II, DR Alpha
RETN	Resistin
ZNF521	Zinc Finger Protein 521
SFTPA1	Surfactant Protein A1
TNNI3	Troponin I3, Cardiac Type
TM9SF4	Transmembrane 9 Superfamily Member 4
PSAP	Prosaposin
BAP1	BRCA1 Associated Protein 1
RECQL	RecQ Like Helicase
KRT8	Keratin 8
PRKCD	Protein Kinase C Delta
MACROH2A1	MacroH2A.1 Histone
CHGA	Chromogranin A
HMGN4	High Mobility Group Nucleosomal Binding Domain 4
RAD17	RAD17 Checkpoint Clamp Loader Component
PRKCA	Protein Kinase C Alpha
CCL4	C-C Motif Chemokine Ligand 4
ORM2	Orosomucoid 2
SLC35C1	Solute Carrier Family 35 Member C1
CYBB	Cytochrome B-245 Beta Chain
IFNL3	Interferon Lambda 3
EMG1	EMG1 N1-Specific Pseudouridine Methyltransferase
ADAM17	ADAM Metallopeptidase Domain 17
GSN	Gelsolin
SOST	Sclerostin
CDCA7	Cell Division Cycle Associated 7
STAT6	Signal Transducer And Activator Of Transcription 6
CNR1	Cannabinoid Receptor 1
KCNN4	Potassium Calcium-Activated Channel Subfamily N Member 4
NSMAF	Neutral Sphingomyelinase Activation Associated Factor
NEDD8	NEDD8 Ubiquitin Like Modifier
TSPO	Translocator Protein
SLCO1B1	Solute Carrier Organic Anion Transporter Family Member 1B1
RPS16	Ribosomal Protein S16
CBLB	Cbl Proto-Oncogene B
TCF7	Transcription Factor 7
LOC100507346	Uncharacterized LOC100507346
IGHM	Immunoglobulin Heavy Constant Mu
GAR1	GAR1 Ribonucleoprotein
HNRNPA2B1	Heterogeneous Nuclear Ribonucleoprotein A2/B1
HMGN1	High Mobility Group Nucleosome Binding Domain 1
SCN9A	Sodium Voltage-Gated Channel Alpha Subunit 9
PSEN2	Presenilin 2
RAP1GDS1	Rap1 GTPase-GDP Dissociation Stimulator 1
CSDE1	Cold Shock Domain Containing E1
TCOF1	Treacle Ribosome Biogenesis Factor 1
FGF7	Fibroblast Growth Factor 7
SOAT1	Sterol O-Acyltransferase 1
RASGRP2	RAS Guanyl Releasing Protein 2
ZNRF3	Zinc And Ring Finger 3
TNFRSF10C	TNF Receptor Superfamily Member 10c
MYLK	Myosin Light Chain Kinase
HSPA9	Heat Shock Protein Family A (Hsp70) Member 9
FYN	FYN Proto-Oncogene, Src Family Tyrosine Kinase
AKAP12	A-Kinase Anchoring Protein 12
MTRR	5-Methyltetrahydrofolate-Homocysteine Methyltransferase Reductase
CEBPZ	CCAAT Enhancer Binding Protein Zeta
UNC13D	Unc-13 Homolog D
FGR	FGR Proto-Oncogene, Src Family Tyrosine Kinase
SPINK1	Serine Peptidase Inhibitor Kazal Type 1
RALY	RALY Heterogeneous Nuclear Ribonucleoprotein
TNFAIP3	TNF Alpha Induced Protein 3
MZF1	Myeloid Zinc Finger 1
DPAGT1	Dolichyl-Phosphate N-Acetylglucosaminephosphotransferase 1
CDC6	Cell Division Cycle 6
PAX6	Paired Box 6
ADM	Adrenomedullin
POLI	DNA Polymerase Iota
FAAP100	FA Core Complex Associated Protein 100
RPS3	Ribosomal Protein S3
SAG	S-Antigen Visual Arrestin
BLOC1S1	Biogenesis Of Lysosomal Organelles Complex 1 Subunit 1
TNFSF13	TNF Superfamily Member 13
ACCS	1-Aminocyclopropane-1-Carboxylate Synthase Homolog (Inactive)
GALNT2	Polypeptide N-Acetylgalactosaminyltransferase 2
FABP3	Fatty Acid Binding Protein 3
CNTLN	Centlein
CTSK	Cathepsin K
RGS2	Regulator Of G Protein Signaling 2
UGT1A1	UDP Glucuronosyltransferase Family 1 Member A1
MIR24-1	MicroRNA 24-1
LOC107105350	NUP98-HOXC11 Recombination Region
HOXB6	Homeobox B6
NOM1	Nucleolar Protein With MIF4G Domain 1
LBR	Lamin B Receptor
CRTC1	CREB Regulated Transcription Coactivator 1
RNLS	Renalase, FAD Dependent Amine Oxidase
GYPC	Glycophorin C (Gerbich Blood Group)
PAX2	Paired Box 2
RPS11	Ribosomal Protein S11
TUBG1	Tubulin Gamma 1
AFP	Alpha Fetoprotein
HSPD1	Heat Shock Protein Family D (Hsp60) Member 1
LRBA	LPS Responsive Beige-Like Anchor Protein
HNRNPU	Heterogeneous Nuclear Ribonucleoprotein U
AXIN1	Axin 1
FBH1	F-Box DNA Helicase 1
HDAC8	Histone Deacetylase 8
RPL12	Ribosomal Protein L12
FYB1	FYN Binding Protein 1
RPL7A	Ribosomal Protein L7a
TCF7L2	Transcription Factor 7 Like 2
PDGFA	Platelet Derived Growth Factor Subunit A
CLK4	CDC Like Kinase 4
LASP1	LIM And SH3 Protein 1
GFRA1	GDNF Family Receptor Alpha 1
CHIT1	Chitinase 1
PPOX	Protoporphyrinogen Oxidase
CTSL	Cathepsin L
RXRB	Retinoid X Receptor Beta
MIR605	MicroRNA 605
LFS3	Li-Fraumeni Syndrome 3
INPP4B	Inositol Polyphosphate-4-Phosphatase Type II B
FSCN1	Fascin Actin-Bundling Protein 1
CLSPN	Claspin
SSTR2	Somatostatin Receptor 2
TCN2	Transcobalamin 2
RAD52	RAD52 Homolog, DNA Repair Protein
SOX3	SRY-Box Transcription Factor 3
SALL2	Spalt Like Transcription Factor 2
MPG	N-Methylpurine DNA Glycosylase
EME1	Essential Meiotic Structure-Specific Endonuclease 1
RPL36	Ribosomal Protein L36
SMN1	Survival Of Motor Neuron 1, Telomeric
LGALS9	Galectin 9
SMN2	Survival Of Motor Neuron 2, Centromeric
RPL13A	Ribosomal Protein L13a
CXCL9	C-X-C Motif Chemokine Ligand 9
ICAM2	Intercellular Adhesion Molecule 2
RBM19	RNA Binding Motif Protein 19
KRT18	Keratin 18
IL13RA2	Interleukin 13 Receptor Subunit Alpha 2
GPX3	Glutathione Peroxidase 3
RBX1	Ring-Box 1
NOL11	Nucleolar Protein 11
MERTK	MER Proto-Oncogene, Tyrosine Kinase
NTRK2	Neurotrophic Receptor Tyrosine Kinase 2
DGAT1	Diacylglycerol O-Acyltransferase 1
MAPT	Microtubule Associated Protein Tau
MIR99A	MicroRNA 99a
L3MBTL3	L3MBTL Histone Methyl-Lysine Binding Protein 3
SHOC2	SHOC2 Leucine Rich Repeat Scaffold Protein
HELQ	Helicase, POLQ Like
DAB2	DAB Adaptor Protein 2
RPL10A	Ribosomal Protein L10a
GTPBP10	GTP Binding Protein 10
MMP7	Matrix Metallopeptidase 7
RBBP8	RB Binding Protein 8, Endonuclease
FAAP24	FA Core Complex Associated Protein 24
NCKIPSD	NCK Interacting Protein With SH3 Domain
CXCL1	C-X-C Motif Chemokine Ligand 1
MAML1	Mastermind Like Transcriptional Coactivator 1
HLX	H2.0 Like Homeobox
ACADS	Acyl-CoA Dehydrogenase Short Chain
LGALS1	Galectin 1
PPARD	Peroxisome Proliferator Activated Receptor Delta
HLTF	Helicase Like Transcription Factor
RPS13	Ribosomal Protein S13
DYSF	Dysferlin
KLF6	Kruppel Like Factor 6
PSMB5	Proteasome 20S Subunit Beta 5
RPL4	Ribosomal Protein L4
WDR48	WD Repeat Domain 48
GPR161	G Protein-Coupled Receptor 161
IFNAR1	Interferon Alpha And Beta Receptor Subunit 1
REV3L	REV3 Like, DNA Directed Polymerase Zeta Catalytic Subunit
MYOG	Myogenin
EBF1	EBF Transcription Factor 1
KLF5	Kruppel Like Factor 5
SMARCC2	SWI/SNF Related, Matrix Associated, Actin Dependent Regulator Of Chromatin Subfamily C Member 2
CCR1	C-C Motif Chemokine Receptor 1
PLK2	Polo Like Kinase 2
PSPC1	Paraspeckle Component 1
BAMBI	BMP And Activin Membrane Bound Inhibitor
RAC1	Rac Family Small GTPase 1
MELK	Maternal Embryonic Leucine Zipper Kinase
MIR214	MicroRNA 214
REST	RE1 Silencing Transcription Factor
IL32	Interleukin 32
PTCRA	Pre T Cell Antigen Receptor Alpha
MIR6797	MicroRNA 6797
MBOAT2	Membrane Bound O-Acyltransferase Domain Containing 2
CDCA7L	Cell Division Cycle Associated 7 Like
TYR	Tyrosinase
KAT5	Lysine Acetyltransferase 5
PLXNA1	Plexin A1
BST1	Bone Marrow Stromal Cell Antigen 1
KAT8	Lysine Acetyltransferase 8
HNRNPA1	Heterogeneous Nuclear Ribonucleoprotein A1
LOC107133518	NUP98-TOP2B Recombination Region
JAG2	Jagged Canonical Notch Ligand 2
AZU1	Azurocidin 1
RPS5	Ribosomal Protein S5
ELF5	E74 Like ETS Transcription Factor 5
YTHDF2	YTH N6-Methyladenosine RNA Binding Protein 2
HSPA1A	Heat Shock Protein Family A (Hsp70) Member 1A
PAX3	Paired Box 3
SEC23B	SEC23 Homolog B, COPII Coat Complex Component
LOC106865369	Nucleoporin 98kDa Recombination Region
IQCG	IQ Motif Containing G
KLF2	Kruppel Like Factor 2
CD81	CD81 Molecule
RTN4	Reticulon 4
PLEK	Pleckstrin
ME3	Malic Enzyme 3
PIK3R3	Phosphoinositide-3-Kinase Regulatory Subunit 3
MIR146B	MicroRNA 146b
BOP1	BOP1 Ribosomal Biogenesis Factor
RIPK1	Receptor Interacting Serine/Threonine Kinase 1
ARAF	A-Raf Proto-Oncogene, Serine/Threonine Kinase
ABRAXAS1	Abraxas 1, BRCA1 A Complex Subunit
RPA1	Replication Protein A1
AVP	Arginine Vasopressin
ACP3	Acid Phosphatase 3
CDC45	Cell Division Cycle 45
NAGLU	N-Acetyl-Alpha-Glucosaminidase
MCM6	Minichromosome Maintenance Complex Component 6
KHDRBS1	KH RNA Binding Domain Containing, Signal Transduction Associated 1
PTTG1	PTTG1 Regulator Of Sister Chromatid Separation, Securin
IL12A	Interleukin 12A
SETMAR	SET Domain And Mariner Transposase Fusion Gene
RPS27L	Ribosomal Protein S27 Like
CCK	Cholecystokinin
TFR2	Transferrin Receptor 2
MIR383	MicroRNA 383
HSPB1	Heat Shock Protein Family B (Small) Member 1
BEX1	Brain Expressed X-Linked 1
HRH2	Histamine Receptor H2
MC1R	Melanocortin 1 Receptor
LDLR	Low Density Lipoprotein Receptor
NSD2	Nuclear Receptor Binding SET Domain Protein 2
PER2	Period Circadian Regulator 2
DDB1	Damage Specific DNA Binding Protein 1
DNAJC2	DnaJ Heat Shock Protein Family (Hsp40) Member C2
CBSL	Cystathionine Beta-Synthase Like
TGIF1	TGFB Induced Factor Homeobox 1
NEBL	Nebulette
PON1	Paraoxonase 1
NEU1	Neuraminidase 1
FSTL5	Follistatin Like 5
SHMT1	Serine Hydroxymethyltransferase 1
ARG1	Arginase 1
RPL30	Ribosomal Protein L30
PLAGL2	PLAG1 Like Zinc Finger 2
RPS8	Ribosomal Protein S8
NUDT15	Nudix Hydrolase 15
TCF4	Transcription Factor 4
STIM1	Stromal Interaction Molecule 1
PRKCQ	Protein Kinase C Theta
HLA-DRB3	Major Histocompatibility Complex, Class II, DR Beta 3
CABIN1	Calcineurin Binding Protein 1
LOC109648316	RUNX1 Element RE2
MIR99AHG	Mir-99a-Let-7c Cluster Host Gene
RAD18	RAD18 E3 Ubiquitin Protein Ligase
FDPS	Farnesyl Diphosphate Synthase
ATP12A	ATPase H+/K+ Transporting Non-Gastric Alpha2 Subunit
IFI16	Interferon Gamma Inducible Protein 16
CD1A	CD1a Molecule
MTSS1	MTSS I-BAR Domain Containing 1
MRPL36	Mitochondrial Ribosomal Protein L36
SH2D1A	SH2 Domain Containing 1A
TREML4	Triggering Receptor Expressed On Myeloid Cells Like 4
NNAT	Neuronatin
LOC110806306	Telomerase RNA Component (TERC) Promoter
MIR363	MicroRNA 363
C5AR1	Complement C5a Receptor 1
CXCL2	C-X-C Motif Chemokine Ligand 2
TONSL	Tonsoku Like, DNA Repair Protein
TP73-AS1	TP73 Antisense RNA 1
LRP1	LDL Receptor Related Protein 1
ATF2	Activating Transcription Factor 2
PDLIM5	PDZ And LIM Domain 5
CEP85L	Centrosomal Protein 85 Like
MAL	Mal, T Cell Differentiation Protein
RPL22L1	Ribosomal Protein L22 Like 1
ALPP	Alkaline Phosphatase, Placental
RPL7	Ribosomal Protein L7
GATA2-AS1	GATA2 Antisense RNA 1
NKIRAS1	NFKB Inhibitor Interacting Ras Like 1
RPL23A	Ribosomal Protein L23a
CBX4	Chromobox 4
RPL14	Ribosomal Protein L14
RPL27A	Ribosomal Protein L27a
PKNOX1	PBX/Knotted 1 Homeobox 1
ICOS	Inducible T Cell Costimulator
HCST	Hematopoietic Cell Signal Transducer
RASA2	RAS P21 Protein Activator 2
CD79B	CD79b Molecule
AHR	Aryl Hydrocarbon Receptor
RPL3L	Ribosomal Protein L3 Like
MEIS2	Meis Homeobox 2
RABGAP1L	RAB GTPase Activating Protein 1 Like
RPS23	Ribosomal Protein S23
ATP4A	ATPase H+/K+ Transporting Subunit Alpha
RPL28	Ribosomal Protein L28
RPL37	Ribosomal Protein L37
TSR1	TSR1 Ribosome Maturation Factor
SCN10A	Sodium Voltage-Gated Channel Alpha Subunit 10
HMGCR	3-Hydroxy-3-Methylglutaryl-CoA Reductase
LTBR	Lymphotoxin Beta Receptor
HBG2	Hemoglobin Subunit Gamma 2
CD99	CD99 Molecule (Xg Blood Group)
FOXO4	Forkhead Box O4
RPS2	Ribosomal Protein S2
TLN1	Talin 1
ESCO2	Establishment Of Sister Chromatid Cohesion N-Acetyltransferase 2
MECP2	Methyl-CpG Binding Protein 2
TGFB3	Transforming Growth Factor Beta 3
RPL21	Ribosomal Protein L21
UNG	Uracil DNA Glycosylase
SMIM3	Small Integral Membrane Protein 3
RPS4X	Ribosomal Protein S4 X-Linked
DUSP4	Dual Specificity Phosphatase 4
ACAD9	Acyl-CoA Dehydrogenase Family Member 9
RPS9	Ribosomal Protein S9
MATR3	Matrin 3
EXO1	Exonuclease 1
ESCO1	Establishment Of Sister Chromatid Cohesion N-Acetyltransferase 1
SARNP	SAP Domain Containing Ribonucleoprotein
HIP1	Huntingtin Interacting Protein 1
DEFB1	Defensin Beta 1
PTPN13	Protein Tyrosine Phosphatase Non-Receptor Type 13
RPL9	Ribosomal Protein L9
PRKACA	Protein Kinase CAMP-Activated Catalytic Subunit Alpha
INHBA	Inhibin Subunit Beta A
STOX1	Storkhead Box 1
RPL36AL	Ribosomal Protein L36a Like
SCD	Stearoyl-CoA Desaturase
LOC107126281	NUP98-HOXA11 Recombination Region
C1RL	Complement C1r Subcomponent Like
CTAG1B	Cancer/Testis Antigen 1B
KNG1	Kininogen 1
BLZF1	Basic Leucine Zipper Nuclear Factor 1
DUSP6	Dual Specificity Phosphatase 6
RPS10-NUDT3	RPS10-NUDT3 Readthrough
NPY	Neuropeptide Y
UNCX	UNC Homeobox
NAT2	N-Acetyltransferase 2
AIFM1	Apoptosis Inducing Factor Mitochondria Associated 1
CYP2B6	Cytochrome P450 Family 2 Subfamily B Member 6
CD1C	CD1c Molecule
B3GAT1	Beta-1,3-Glucuronyltransferase 1
DDX1	DEAD-Box Helicase 1
NOB1	NIN1 (RPN12) Binding Protein 1 Homolog
HADH	Hydroxyacyl-CoA Dehydrogenase
SERPINB2	Serpin Family B Member 2
HEATR1	HEAT Repeat Containing 1
CDX4	Caudal Type Homeobox 4
PLAG1	PLAG1 Zinc Finger
OPRM1	Opioid Receptor Mu 1
PDE4B	Phosphodiesterase 4B
[truncated: 10,788 more rows]

## Sheet: AML-MDS
Targets of Myelodysplastic Syndromes (MDS)-derived Acute Myeloid Leukemia (AML) (AML-MDS)
Gene Symbol	Description
FLT3	Fms Related Receptor Tyrosine Kinase 3
RUNX1	RUNX Family Transcription Factor 1
TP53	Tumor Protein P53
JAK2	Janus Kinase 2
KIT	KIT Proto-Oncogene, Receptor Tyrosine Kinase
GATA2	GATA Binding Protein 2
NPM1	Nucleophosmin 1
ETV6	ETS Variant Transcription Factor 6
CEBPA	CCAAT Enhancer Binding Protein Alpha
NRAS	NRAS Proto-Oncogene, GTPase
KMT2A	Lysine Methyltransferase 2A
ABL1	ABL Proto-Oncogene 1, Non-Receptor Tyrosine Kinase
U2AF1	U2 Small Nuclear RNA Auxiliary Factor 1
TET2	Tet Methylcytosine Dioxygenase 2
ASXL1	ASXL Transcriptional Regulator 1
PTPN11	Protein Tyrosine Phosphatase Non-Receptor Type 11
KRAS	KRAS Proto-Oncogene, GTPase
SETBP1	SET Binding Protein 1
DNMT3A	DNA Methyltransferase 3 Alpha
HRAS	HRas Proto-Oncogene, GTPase
CSF3R	Colony Stimulating Factor 3 Receptor
WT1	WT1 Transcription Factor
CBL	Cbl Proto-Oncogene
MYC	MYC Proto-Oncogene, BHLH Transcription Factor
TERT	Telomerase Reverse Transcriptase
PDGFRB	Platelet Derived Growth Factor Receptor Beta
STAT3	Signal Transducer And Activator Of Transcription 3
THPO	Thrombopoietin
GATA1	GATA Binding Protein 1
BCR	BCR Activator Of RhoGEF And GTPase
STAT5B	Signal Transducer And Activator Of Transcription 5B
MPL	MPL Proto-Oncogene, Thrombopoietin Receptor
IDH1	Isocitrate Dehydrogenase (NADP(+)) 1
NF1	Neurofibromin 1
CREBBP	CREB Binding Protein
SRSF2	Serine And Arginine Rich Splicing Factor 2
SF3B1	Splicing Factor 3b Subunit 1
PTEN	Phosphatase And Tensin Homolog
IDH2	Isocitrate Dehydrogenase (NADP(+)) 2
MECOM	MDS1 And EVI1 Complex Locus
ATM	ATM Serine/Threonine Kinase
CBFB	Core-Binding Factor Subunit Beta
RARA	Retinoic Acid Receptor Alpha
CDKN2A	Cyclin Dependent Kinase Inhibitor 2A
CSF3	Colony Stimulating Factor 3
CDK4	Cyclin Dependent Kinase 4
FGFR1	Fibroblast Growth Factor Receptor 1
KAT6A	Lysine Acetyltransferase 6A
IL10	Interleukin 10
MYB	MYB Proto-Oncogene, Transcription Factor
CALR	Calreticulin
NSD1	Nuclear Receptor Binding SET Domain Protein 1
PDGFRA	Platelet Derived Growth Factor Receptor Alpha
CXCR4	C-X-C Motif Chemokine Receptor 4
IKZF1	IKAROS Family Zinc Finger 1
NUP214	Nucleoporin 214
MDM2	MDM2 Proto-Oncogene
TAL1	TAL BHLH Transcription Factor 1, Erythroid Differentiation Factor
PML	PML Nuclear Body Scaffold
RPS14	Ribosomal Protein S14
SAMD9L	Sterile Alpha Motif Domain Containing 9 Like
CCND1	Cyclin D1
GFI1	Growth Factor Independent 1 Transcriptional Repressor
IFNG	Interferon Gamma
RTEL1	Regulator Of Telomere Elongation Helicase 1
ELANE	Elastase, Neutrophil Expressed
CHEK2	Checkpoint Kinase 2
MIR223	MicroRNA 223
RUNX1T1	RUNX1 Partner Transcriptional Co-Repressor 1
PICALM	Phosphatidylinositol Binding Clathrin Assembly Protein
MLLT3	MLLT3 Super Elongation Complex Subunit
PAX5	Paired Box 5
CSF2	Colony Stimulating Factor 2
IL3	Interleukin 3
MLLT10	MLLT10 Histone Lysine Methyltransferase DOT1L Cofactor
SRC	SRC Proto-Oncogene, Non-Receptor Tyrosine Kinase
BRCA2	BRCA2 DNA Repair Associated
NUP98	Nucleoporin 98 And 96 Precursor
IRF8	Interferon Regulatory Factor 8
PBX1	PBX Homeobox 1
ZBTB16	Zinc Finger And BTB Domain Containing 16
EP300	E1A Binding Protein P300
MPO	Myeloperoxidase
MCL1	MCL1 Apoptosis Regulator, BCL2 Family Member
MIR126	MicroRNA 126
RAD51	RAD51 Recombinase
MIR34A	MicroRNA 34a
CTNNB1	Catenin Beta 1
ITGA2B	Integrin Subunit Alpha 2b
ABCB1	ATP Binding Cassette Subfamily B Member 1
MIR17	MicroRNA 17
CTLA4	Cytotoxic T-Lymphocyte Associated Protein 4
DNAJC21	DnaJ Heat Shock Protein Family (Hsp40) Member C21
MIR125A	MicroRNA 125a
MYH11	Myosin Heavy Chain 11
AFF1	AF4/FMR2 Family Member 1
DDX41	DEAD-Box Helicase 41
TCF3	Transcription Factor 3
FANCA	FA Complementation Group A
CHIC2	Cysteine Rich Hydrophobic Domain 2
SETD2	SET Domain Containing 2, Histone Lysine Methyltransferase
MIR378A	MicroRNA 378a
TNF	Tumor Necrosis Factor
FIP1L1	Factor Interacting With PAPOLA And CPSF1
PRF1	Perforin 1
EPO	Erythropoietin
STAT5A	Signal Transducer And Activator Of Transcription 5A
MIR155	MicroRNA 155
PIK3CA	Phosphatidylinositol-4,5-Bisphosphate 3-Kinase Catalytic Subunit Alpha
MAP2K1	Mitogen-Activated Protein Kinase Kinase 1
MIR18A	MicroRNA 18a
IL6	Interleukin 6
MLF1	Myeloid Leukemia Factor 1
SH3GL1	SH3 Domain Containing GRB2 Like 1, Endophilin A2
CD34	CD34 Molecule
KITLG	KIT Ligand
EPOR	Erythropoietin Receptor
MIR127	MicroRNA 127
ACTB	Actin Beta
CBFA2T3	CBFA2/RUNX1 Partner Transcriptional Co-Repressor 3
SET	SET Nuclear Proto-Oncogene
CD33	CD33 Molecule
MIR210	MicroRNA 210
MIR27A	MicroRNA 27a
MIR15A	MicroRNA 15a
BCOR	BCL6 Corepressor
BRD4	Bromodomain Containing 4
LPP	LIM Domain Containing Preferred Translocation Partner In Lipoma
CASP3	Caspase 3
MIRLET7C	MicroRNA Let-7c
CDKN2B	Cyclin Dependent Kinase Inhibitor 2B
BRCA1	BRCA1 DNA Repair Associated
MIR424	MicroRNA 424
DEK	DEK Proto-Oncogene
FANCC	FA Complementation Group C
MYCN	MYCN Proto-Oncogene, BHLH Transcription Factor
HOXA9	Homeobox A9
KMT2D	Lysine Methyltransferase 2D
MEIS1	Meis Homeobox 1
IL2	Interleukin 2
CDKN1A	Cyclin Dependent Kinase Inhibitor 1A
HLA-C	Major Histocompatibility Complex, Class I, C
RBM15	RNA Binding Motif Protein 15
CXCL8	C-X-C Motif Chemokine Ligand 8
FAS	Fas Cell Surface Death Receptor
MIR199B	MicroRNA 199b
AKT1	AKT Serine/Threonine Kinase 1
IFNA1	Interferon Alpha 1
CSF1R	Colony Stimulating Factor 1 Receptor
IL1B	Interleukin 1 Beta
NBN	Nibrin
MIR130B	MicroRNA 130b
VEGFA	Vascular Endothelial Growth Factor A
DNTT	DNA Nucleotidylexotransferase
MIR29A	MicroRNA 29a
MIR145	MicroRNA 145
NOTCH1	Notch Receptor 1
CD38	CD38 Molecule
MIR181A2	MicroRNA 181a-2
STAT1	Signal Transducer And Activator Of Transcription 1
MIR106B	MicroRNA 106b
DNMT1	DNA Methyltransferase 1
ANPEP	Alanyl Aminopeptidase, Membrane
MIR30D	MicroRNA 30d
ANXA5	Annexin A5
EZH2	Enhancer Of Zeste 2 Polycomb Repressive Complex 2 Subunit
ITGAM	Integrin Subunit Alpha M
ERCC6L2	ERCC Excision Repair 6 Like 2
CSF1	Colony Stimulating Factor 1
EWSR1	EWS RNA Binding Protein 1
MIR331	MicroRNA 331
MIR34B	MicroRNA 34b
IL3RA	Interleukin 3 Receptor Subunit Alpha
LUC7L2	LUC7 Like 2, Pre-MRNA Splicing Factor
TGM6	Transglutaminase 6
MAPK8	Mitogen-Activated Protein Kinase 8
MIR326	MicroRNA 326
CXCL12	C-X-C Motif Chemokine Ligand 12
XIAP	X-Linked Inhibitor Of Apoptosis
LYN	LYN Proto-Oncogene, Src Family Tyrosine Kinase
CASP8	Caspase 8
HDAC9	Histone Deacetylase 9
JAK3	Janus Kinase 3
MIR320A	MicroRNA 320a
MIR204	MicroRNA 204
MIR324	MicroRNA 324
BCL2L1	BCL2 Like 1
CDK2	Cyclin Dependent Kinase 2
JAK1	Janus Kinase 1
ITGAX	Integrin Subunit Alpha X
CYCS	Cytochrome C, Somatic
CD8A	CD8a Molecule
SPI1	Spi-1 Proto-Oncogene
ABCC1	ATP Binding Cassette Subfamily C Member 1
DICER1	Dicer 1, Ribonuclease III
IL7	Interleukin 7
ERBB2	Erb-B2 Receptor Tyrosine Kinase 2
MAPK1	Mitogen-Activated Protein Kinase 1
ARHGAP26	Rho GTPase Activating Protein 26
DCK	Deoxycytidine Kinase
BMI1	BMI1 Proto-Oncogene, Polycomb Ring Finger
TFRC	Transferrin Receptor
TOP1	DNA Topoisomerase I
IL4	Interleukin 4
FOS	Fos Proto-Oncogene, AP-1 Transcription Factor Subunit
KLRK1	Killer Cell Lectin Like Receptor K1
MIR196A1	MicroRNA 196a-1
H2AC18	H2A Clustered Histone 18
BTK	Bruton Tyrosine Kinase
CREB1	CAMP Responsive Element Binding Protein 1
MMP9	Matrix Metallopeptidase 9
KDR	Kinase Insert Domain Receptor
PARP1	Poly(ADP-Ribose) Polymerase 1
PTPRC	Protein Tyrosine Phosphatase Receptor Type C
TNFRSF10B	TNF Receptor Superfamily Member 10b
FASLG	Fas Ligand
ALB	Albumin
BRAF	B-Raf Proto-Oncogene, Serine/Threonine Kinase
PRAME	PRAME Nuclear Receptor Transcriptional Regulator
MAPK3	Mitogen-Activated Protein Kinase 3
BAALC	BAALC Binder Of MAP3K1 And KLF4
CD19	CD19 Molecule
PROM1	Prominin 1
CCNA2	Cyclin A2
CDKN1B	Cyclin Dependent Kinase Inhibitor 1B
CD7	CD7 Molecule
JUN	Jun Proto-Oncogene, AP-1 Transcription Factor Subunit
BCL2L11	BCL2 Like 11
CDA	Cytidine Deaminase
FGF2	Fibroblast Growth Factor 2
MLLT1	MLLT1 Super Elongation Complex Subunit
ABCG2	ATP Binding Cassette Subfamily G Member 2 (Junior Blood Group)
HLA-A	Major Histocompatibility Complex, Class I, A
MEG3	Maternally Expressed 3
MVP	Major Vault Protein
CDK6	Cyclin Dependent Kinase 6
RARS1	Arginyl-TRNA Synthetase 1
CD80	CD80 Molecule
CLEC12A	C-Type Lectin Domain Family 12 Member A
CASP9	Caspase 9
BCL6	BCL6 Transcription Repressor
FLT1	Fms Related Receptor Tyrosine Kinase 1
LCK	LCK Proto-Oncogene, Src Family Tyrosine Kinase
CEBPB	CCAAT Enhancer Binding Protein Beta
THY1	Thy-1 Cell Surface Antigen
HAX1	HCLS1 Associated Protein X-1
CD44	CD44 Molecule (Indian Blood Group)
CD4	CD4 Molecule
B2M	Beta-2-Microglobulin
EGR1	Early Growth Response 1
CBFA2T2	CBFA2/RUNX1 Partner Transcriptional Co-Repressor 2
FLT3LG	Fms Related Receptor Tyrosine Kinase 3 Ligand
HSP90AA1	Heat Shock Protein 90 Alpha Family Class A Member 1
ITGB3	Integrin Subunit Beta 3
KIR3DL1	Killer Cell Immunoglobulin Like Receptor, Three Ig Domains And Long Cytoplasmic Tail 1
ANKRD26	Ankyrin Repeat Domain 26
AFDN	Afadin, Adherens Junction Formation Factor
KDM4C	Lysine Demethylase 4C
EGFR	Epidermal Growth Factor Receptor
HAVCR2	Hepatitis A Virus Cellular Receptor 2
RUNX3	RUNX Family Transcription Factor 3
IL15	Interleukin 15
SIRT1	Sirtuin 1
DNMT3B	DNA Methyltransferase 3 Beta
RUNX2	RUNX Family Transcription Factor 2
ALK	ALK Receptor Tyrosine Kinase
CEBPE	CCAAT Enhancer Binding Protein Epsilon
MME	Membrane Metalloendopeptidase
CD79A	CD79a Molecule
U2AF1L4	U2 Small Nuclear RNA Auxiliary Factor 1 Like 4
CCR6	C-C Motif Chemokine Receptor 6
LMO2	LIM Domain Only 2
CDK1	Cyclin Dependent Kinase 1
AURKB	Aurora Kinase B
CD274	CD274 Molecule
NCAM1	Neural Cell Adhesion Molecule 1
ZRSR2	Zinc Finger CCCH-Type, RNA Binding Motif And Serine/Arginine Rich 2
MIR21	MicroRNA 21
MTOR	Mechanistic Target Of Rapamycin Kinase
HOXA10	Homeobox A10
MTHFR	Methylenetetrahydrofolate Reductase
SYK	Spleen Associated Tyrosine Kinase
HLA-DRB1	Major Histocompatibility Complex, Class II, DR Beta 1
MIR142	MicroRNA 142
MIR9-1	MicroRNA 9-1
CDH1	Cadherin 1
HOTAIR	HOX Transcript Antisense RNA
MIR221	MicroRNA 221
FUT4	Fucosyltransferase 4
HIF1A	Hypoxia Inducible Factor 1 Subunit Alpha
GYPA	Glycophorin A (MNS Blood Group)
STAG2	Stromal Antigen 2
EIF4E	Eukaryotic Translation Initiation Factor 4E
PTPA	Protein Phosphatase 2 Phosphatase Activator
GRB2	Growth Factor Receptor Bound Protein 2
IL7R	Interleukin 7 Receptor
CD226	CD226 Molecule
MIR199A1	MicroRNA 199a-1
MIR150	MicroRNA 150
CD5	CD5 Molecule
AXL	AXL Receptor Tyrosine Kinase
FN1	Fibronectin 1
KMT2C	Lysine Methyltransferase 2C
HDAC1	Histone Deacetylase 1
LYL1	LYL1 Basic Helix-Loop-Helix Family Member
MIR146A	MicroRNA 146a
MIR181A1	MicroRNA 181a-1
FCGR3B	Fc Fragment Of IgG Receptor IIIb
FOXO3	Forkhead Box O3
GAPDH	Glyceraldehyde-3-Phosphate Dehydrogenase
SUZ12	SUZ12 Polycomb Repressive Complex 2 Subunit
MIR151A	MicroRNA 151a
MN1	MN1 Proto-Oncogene, Transcriptional Regulator
CD22	CD22 Molecule
ELL	Elongation Factor For RNA Polymerase II
PLK1	Polo Like Kinase 1
EIF4EBP1	Eukaryotic Translation Initiation Factor 4E Binding Protein 1
CDKN3	Cyclin Dependent Kinase Inhibitor 3
NTRK1	Neurotrophic Receptor Tyrosine Kinase 1
THBD	Thrombomodulin
VAV1	Vav Guanine Nucleotide Exchange Factor 1
MAP2K7	Mitogen-Activated Protein Kinase Kinase 7
PIM1	Pim-1 Proto-Oncogene, Serine/Threonine Kinase
MIR486-1	MicroRNA 486-1
IL1A	Interleukin 1 Alpha
CD86	CD86 Molecule
H4-16	H4 Histone 16
FCGR3A	Fc Fragment Of IgG Receptor IIIa
HOTAIRM1	HOXA Transcript Antisense RNA, Myeloid-Specific 1
CD2	CD2 Molecule
CDKN2B-AS1	CDKN2B Antisense RNA 1
PRAM1	PML-RARA Regulated Adaptor Molecule 1
NCOA2	Nuclear Receptor Coactivator 2
PMAIP1	Phorbol-12-Myristate-13-Acetate-Induced Protein 1
TNFRSF8	TNF Receptor Superfamily Member 8
MIR574	MicroRNA 574
CCR5	C-C Motif Chemokine Receptor 5
EGF	Epidermal Growth Factor
SPN	Sialophorin
UCA1	Urothelial Cancer Associated 1
FBXW7	F-Box And WD Repeat Domain Containing 7
MIR128-2	MicroRNA 128-2
MIR222	MicroRNA 222
EVPL	Envoplakin
FOXP3	Forkhead Box P3
ARHGEF1	Rho Guanine Nucleotide Exchange Factor 1
NCOR1	Nuclear Receptor Corepressor 1
ICOSLG	Inducible T Cell Costimulator Ligand
RPS6KB1	Ribosomal Protein S6 Kinase B1
MIR29B1	MicroRNA 29b-1
XPO1	Exportin 1
CHEK1	Checkpoint Kinase 1
PHF6	PHD Finger Protein 6
IGF1R	Insulin Like Growth Factor 1 Receptor
TNFRSF1A	TNF Receptor Superfamily Member 1A
TRIB2	Tribbles Pseudokinase 2
MIR22	MicroRNA 22
KIR2DL1	Killer Cell Immunoglobulin Like Receptor, Two Ig Domains And Long Cytoplasmic Tail 1
NCOR2	Nuclear Receptor Corepressor 2
CD28	CD28 Molecule
MIR23A	MicroRNA 23a
HOXA7	Homeobox A7
KDM5A	Lysine Demethylase 5A
KIR2DL3	Killer Cell Immunoglobulin Like Receptor, Two Ig Domains And Long Cytoplasmic Tail 3
BCL2L2	BCL2 Like 2
ERCC6	ERCC Excision Repair 6, Chromatin Remodeling Factor
TET1	Tet Methylcytosine Dioxygenase 1
IGHV4-38-2	Immunoglobulin Heavy Variable 4-38-2
MIR23B	MicroRNA 23b
DIABLO	Diablo IAP-Binding Mitochondrial Protein
TNFRSF9	TNF Receptor Superfamily Member 9
MIRLET7B	MicroRNA Let-7b
CARTPT	CART Prepropeptide
HDAC2	Histone Deacetylase 2
SELP	Selectin P
MIR30A	MicroRNA 30a
CD55	CD55 Molecule (Cromer Blood Group)
SIGLEC5	Sialic Acid Binding Ig Like Lectin 5
MIR15B	MicroRNA 15b
CDK9	Cyclin Dependent Kinase 9
MIR128-1	MicroRNA 128-1
KDM6A	Lysine Demethylase 6A
ESR1	Estrogen Receptor 1
MIR451A	MicroRNA 451a
CD47	CD47 Molecule
MIR335	MicroRNA 335
NCL	Nucleolin
MIR130A	MicroRNA 130a
SERPINC1	Serpin Family C Member 1
CCDC26	CCDC26 Long Non-Coding RNA
KLRD1	Killer Cell Lectin Like Receptor D1
FCGR1A	Fc Fragment Of IgG Receptor Ia
NCR3	Natural Cytotoxicity Triggering Receptor 3
MIR27B	MicroRNA 27b
ANXA8	Annexin A8
MIR193A	MicroRNA 193a
SERPINA3	Serpin Family A Member 3
MIR182	MicroRNA 182
MIR147A	MicroRNA 147a
MIRLET7E	MicroRNA Let-7e
GMPS	Guanine Monophosphate Synthase
NCR1	Natural Cytotoxicity Triggering Receptor 1
MALAT1	Metastasis Associated Lung Adenocarcinoma Transcript 1
MIR483	MicroRNA 483
VWF	Von Willebrand Factor
KLF4	Kruppel Like Factor 4
CD96	CD96 Molecule
TET3	Tet Methylcytosine Dioxygenase 3
DOT1L	DOT1 Like Histone Lysine Methyltransferase
TNFRSF1B	TNF Receptor Superfamily Member 1B
RPS3A	Ribosomal Protein S3A
ELN	Elastin
TUG1	Taurine Up-Regulated 1
MIR339	MicroRNA 339
MIR30C1	MicroRNA 30c-1
MIR140	MicroRNA 140
MIR31	MicroRNA 31
FOXO1	Forkhead Box O1
MIR195	MicroRNA 195
BRD2	Bromodomain Containing 2
CD40LG	CD40 Ligand
KLRC1	Killer Cell Lectin Like Receptor C1
BCORL1	BCL6 Corepressor Like 1
HOXA5	Homeobox A5
POU5F1	POU Class 5 Homeobox 1
MIR30E	MicroRNA 30e
AR	Androgen Receptor
SMC3	Structural Maintenance Of Chromosomes 3
MIR532	MicroRNA 532
KDM1A	Lysine Demethylase 1A
MIR338	MicroRNA 338
SMC1A	Structural Maintenance Of Chromosomes 1A
PSMA7	Proteasome 20S Subunit Alpha 7
BHLHE40	Basic Helix-Loop-Helix Family Member E40
COLEC10	Collectin Subfamily Member 10
MIR154	MicroRNA 154
MIR455	MicroRNA 455
MIR374A	MicroRNA 374a
MIR542	MicroRNA 542
MIR628	MicroRNA 628
MIR423	MicroRNA 423
HDAC6	Histone Deacetylase 6
WT1-AS	WT1 Antisense RNA
CTCF	CCCTC-Binding Factor
NCR2	Natural Cytotoxicity Triggering Receptor 2
CCAT1	Colon Cancer Associated Transcript 1
SOX2	SRY-Box Transcription Factor 2
FER	FER Tyrosine Kinase
CD24	CD24 Molecule
H4C1	H4 Clustered Histone 1
MIR28	MicroRNA 28
SLAMF1	Signaling Lymphocytic Activation Molecule Family Member 1
METTL3	Methyltransferase Like 3
STUB1	STIP1 Homology And U-Box Containing Protein 1
ALDH1A1	Aldehyde Dehydrogenase 1 Family Member A1
AGO2	Argonaute RISC Catalytic Component 2
SNAI1	Snail Family Transcriptional Repressor 1
CD14	CD14 Molecule
MIR34C	MicroRNA 34c
NANOG	Nanog Homeobox
ANGPT1	Angiopoietin 1
BRD3	Bromodomain Containing 3
PCM1	Pericentriolar Material 1
MIR328	MicroRNA 328
CD48	CD48 Molecule
TCHP	Trichoplein Keratin Filament Binding
MATK	Megakaryocyte-Associated Tyrosine Kinase
MIR181C	MicroRNA 181c
MIR340	MicroRNA 340
H4C3	H4 Clustered Histone 3
MIR337	MicroRNA 337
MIR582	MicroRNA 582
PSMD5	Proteasome 26S Subunit, Non-ATPase 5
H4C2	H4 Clustered Histone 2
H4C9	H4 Clustered Histone 9
PRDM10	PR/SET Domain 10
MIR212	MicroRNA 212
MIR223HG	MIR223 Host Gene
MIR302D	MicroRNA 302d
MIR367	MicroRNA 367
MIR184	MicroRNA 184
LCOR	Ligand Dependent Nuclear Receptor Corepressor
LSR	Lipolysis Stimulated Lipoprotein Receptor
H3-2	H3.2 Histone (Putative)
TLR2	Toll Like Receptor 2
PSMD4	Proteasome 26S Subunit, Non-ATPase 4
H4C14	H4 Clustered Histone 14
H4C8	H4 Clustered Histone 8
H4C15	H4 Clustered Histone 15
MIR219A1	MicroRNA 219a-1
BRDT	Bromodomain Testis Associated
CEP70	Centrosomal Protein 70
MIR330	MicroRNA 330
PRODH	Proline Dehydrogenase 1
H4C13	H4 Clustered Histone 13
IRAIN	IGF1R Antisense Imprinted Non-Protein Coding RNA
MIR590	MicroRNA 590
ZNF23	Zinc Finger Protein 23
H4C12	H4 Clustered Histone 12
NSMCE3	NSE3 Homolog, SMC5-SMC6 Complex Component
MIR615	MicroRNA 615
H4C11	H4 Clustered Histone 11
KLRC2	Killer Cell Lectin Like Receptor C2
SULT2B1	Sulfotransferase Family 2B Member 1
H4C4	H4 Clustered Histone 4
H4C5	H4 Clustered Histone 5
MIR376A1	MicroRNA 376a-1
H4C6	H4 Clustered Histone 6
G6PC3	Glucose-6-Phosphatase Catalytic Subunit 3
MIR372	MicroRNA 372
MIR432	MicroRNA 432
TUSC7	Tumor Suppressor Candidate 7
MIR744	MicroRNA 744
MIR325	MicroRNA 325
ENSG00000287119
SERPINE1	Serpin Family E Member 1
F2	Coagulation Factor II, Thrombin
KLF1	Kruppel Like Factor 1
LOC106992256	T(11;20)(P15;Q11) Topoisomerase (DNA) I Recombination Region
HLA-B	Major Histocompatibility Complex, Class I, B
HGF	Hepatocyte Growth Factor
CRP	C-Reactive Protein
DHFR	Dihydrofolate Reductase
EIF6	Eukaryotic Translation Initiation Factor 6
F3	Coagulation Factor III, Tissue Factor
LOC107133509	NUP98-NSD3 Recombination Region
ITGAL	Integrin Subunit Alpha L
CCL3	C-C Motif Chemokine Ligand 3
FHL2	Four And A Half LIM Domains 2
G6PD	Glucose-6-Phosphate Dehydrogenase
APOE	Apolipoprotein E
ACP1	Acid Phosphatase 1
VDR	Vitamin D Receptor
IL1R1	Interleukin 1 Receptor Type 1
HLA-DPB1	Major Histocompatibility Complex, Class II, DP Beta 1
IL1RN	Interleukin 1 Receptor Antagonist
HP	Haptoglobin
IGF1	Insulin Like Growth Factor 1
C5	Complement C5
VCAM1	Vascular Cell Adhesion Molecule 1
GATA3	GATA Binding Protein 3
LOC107197952	NUP98-HOXA9 Recombination Region
KMT2E	Lysine Methyltransferase 2E (Inactive)
HLA-DQB1	Major Histocompatibility Complex, Class II, DQ Beta 1
HBB	Hemoglobin Subunit Beta
SEC23B	SEC23 Homolog B, COPII Coat Complex Component
IL6R	Interleukin 6 Receptor
KIF23	Kinesin Family Member 23
IL17A	Interleukin 17A
SELE	Selectin E
C3	Complement C3
IFNB1	Interferon Beta 1
ANGPT2	Angiopoietin 2
THBS1	Thrombospondin 1
LOC107126281	NUP98-HOXA11 Recombination Region
IL18R1	Interleukin 18 Receptor 1
CCL5	C-C Motif Chemokine Ligand 5
CD46	CD46 Molecule
LOC107126288	NUP98-HOXA13 Recombination Region
PLAGL2	PLAG1 Like Zinc Finger 2
VHL	Von Hippel-Lindau Tumor Suppressor
CXCL10	C-X-C Motif Chemokine Ligand 10
WDR48	WD Repeat Domain 48
CAMP	Cathelicidin Antimicrobial Peptide
LOC106865369	Nucleoporin 98kDa Recombination Region
TGIF1	TGFB Induced Factor Homeobox 1
HDC	Histidine Decarboxylase
DIAPH3	Diaphanous Related Formin 3
CALCA	Calcitonin Related Polypeptide Alpha
NOD2	Nucleotide Binding Oligomerization Domain Containing 2
HMOX1	Heme Oxygenase 1
LEPQTL1	Leptin, Serum Levels Of
LOC107126359	NUP98-HOXD13 Recombination Region
IGHE	Immunoglobulin Heavy Constant Epsilon
FTL	Ferritin Light Chain
MAN1B1	Mannosidase Alpha Class 1B Member 1
MKI67	Marker Of Proliferation Ki-67
RPN2	Ribophorin II
LOC106865368	Inversion(11)(P15q22) DEAD (Asp-Glu-Ala-Asp) Box Polypeptide 10 Recombination Region
CDAN1	Codanin 1
FGA	Fibrinogen Alpha Chain
CDIN1	CDAN1 Interacting Nuclease 1
MRPL46	Mitochondrial Ribosomal Protein L46
RRM2B	Ribonucleotide Reductase Regulatory TP53 Inducible Subunit M2B
GAS2L3	Growth Arrest Specific 2 Like 3
PERM1	PPARGC1 And ESRR Induced Regulator, Muscle 1
LOC107195252	NUP98-HHEX Recombination Region
LOC107133517	NUP98-IQCG Recombination Region
GYPC	Glycophorin C (Gerbich Blood Group)
KIR2DS1	Killer Cell Immunoglobulin Like Receptor, Two Ig Domains And Short Cytoplasmic Tail 1
LOC107105350	NUP98-HOXC11 Recombination Region
KIR2DS2	Killer Cell Immunoglobulin Like Receptor, Two Ig Domains And Short Cytoplasmic Tail 2
LOC107133518	NUP98-TOP2B Recombination Region
SERPINB2	Serpin Family B Member 2
KIR2DS4	Killer Cell Immunoglobulin Like Receptor, Two Ig Domains And Short Cytoplasmic Tail 4
CPT1A	Carnitine Palmitoyltransferase 1A
KIR2DS3	Killer Cell Immunoglobulin Like Receptor, Two Ig Domains And Short Cytoplasmic Tail 3
KIR3DS1	Killer Cell Immunoglobulin Like Receptor, Three Ig Domains And Short Cytoplasmic Tail 1
KIR2DS5	Killer Cell Immunoglobulin Like Receptor, Two Ig Domains And Short Cytoplasmic Tail 5
MUC16	Mucin 16, Cell Surface Associated
KIR2DL5A	Killer Cell Immunoglobulin Like Receptor, Two Ig Domains And Long Cytoplasmic Tail 5A
KIR2DL2	Killer Cell Immunoglobulin Like Receptor, Two Ig Domains And Long Cytoplasmic Tail 2
CABIN1	Calcineurin Binding Protein 1
GH1	Growth Hormone 1
HBA2	Hemoglobin Subunit Alpha 2
SLC17A5	Solute Carrier Family 17 Member 5
NPPB	Natriuretic Peptide B

## Sheet: Overlapping targets
Overlapping targets of the disease
Gene Symbol	Description
FLT3	Fms Related Receptor Tyrosine Kinase 3
RUNX1	RUNX Family Transcription Factor 1
TP53	Tumor Protein P53
JAK2	Janus Kinase 2
KIT	KIT Proto-Oncogene, Receptor Tyrosine Kinase
GATA2	GATA Binding Protein 2
NPM1	Nucleophosmin 1
ETV6	ETS Variant Transcription Factor 6
CEBPA	CCAAT Enhancer Binding Protein Alpha
NRAS	NRAS Proto-Oncogene, GTPase
KMT2A	Lysine Methyltransferase 2A
ABL1	ABL Proto-Oncogene 1, Non-Receptor Tyrosine Kinase
U2AF1	U2 Small Nuclear RNA Auxiliary Factor 1
TET2	Tet Methylcytosine Dioxygenase 2
ASXL1	ASXL Transcriptional Regulator 1
PTPN11	Protein Tyrosine Phosphatase Non-Receptor Type 11
KRAS	KRAS Proto-Oncogene, GTPase
SETBP1	SET Binding Protein 1
DNMT3A	DNA Methyltransferase 3 Alpha
HRAS	HRas Proto-Oncogene, GTPase
CSF3R	Colony Stimulating Factor 3 Receptor
WT1	WT1 Transcription Factor
CBL	Cbl Proto-Oncogene
MYC	MYC Proto-Oncogene, BHLH Transcription Factor
TERT	Telomerase Reverse Transcriptase
PDGFRB	Platelet Derived Growth Factor Receptor Beta
STAT3	Signal Transducer And Activator Of Transcription 3
THPO	Thrombopoietin
GATA1	GATA Binding Protein 1
BCR	BCR Activator Of RhoGEF And GTPase
STAT5B	Signal Transducer And Activator Of Transcription 5B
MPL	MPL Proto-Oncogene, Thrombopoietin Receptor
IDH1	Isocitrate Dehydrogenase (NADP(+)) 1
NF1	Neurofibromin 1
CREBBP	CREB Binding Protein
SRSF2	Serine And Arginine Rich Splicing Factor 2
SF3B1	Splicing Factor 3b Subunit 1
PTEN	Phosphatase And Tensin Homolog
IDH2	Isocitrate Dehydrogenase (NADP(+)) 2
MECOM	MDS1 And EVI1 Complex Locus
ATM	ATM Serine/Threonine Kinase
CBFB	Core-Binding Factor Subunit Beta
RARA	Retinoic Acid Receptor Alpha
CDKN2A	Cyclin Dependent Kinase Inhibitor 2A
CSF3	Colony Stimulating Factor 3
CDK4	Cyclin Dependent Kinase 4
FGFR1	Fibroblast Growth Factor Receptor 1
KAT6A	Lysine Acetyltransferase 6A
IL10	Interleukin 10
MYB	MYB Proto-Oncogene, Transcription Factor
CALR	Calreticulin
NSD1	Nuclear Receptor Binding SET Domain Protein 1
PDGFRA	Platelet Derived Growth Factor Receptor Alpha
CXCR4	C-X-C Motif Chemokine Receptor 4
IKZF1	IKAROS Family Zinc Finger 1
NUP214	Nucleoporin 214
MDM2	MDM2 Proto-Oncogene
TAL1	TAL BHLH Transcription Factor 1, Erythroid Differentiation Factor
PML	PML Nuclear Body Scaffold
RPS14	Ribosomal Protein S14
SAMD9L	Sterile Alpha Motif Domain Containing 9 Like
CCND1	Cyclin D1
GFI1	Growth Factor Independent 1 Transcriptional Repressor
IFNG	Interferon Gamma
RTEL1	Regulator Of Telomere Elongation Helicase 1
ELANE	Elastase, Neutrophil Expressed
CHEK2	Checkpoint Kinase 2
MIR223	MicroRNA 223
RUNX1T1	RUNX1 Partner Transcriptional Co-Repressor 1
PICALM	Phosphatidylinositol Binding Clathrin Assembly Protein
MLLT3	MLLT3 Super Elongation Complex Subunit
PAX5	Paired Box 5
CSF2	Colony Stimulating Factor 2
IL3	Interleukin 3
MLLT10	MLLT10 Histone Lysine Methyltransferase DOT1L Cofactor
SRC	SRC Proto-Oncogene, Non-Receptor Tyrosine Kinase
BRCA2	BRCA2 DNA Repair Associated
NUP98	Nucleoporin 98 And 96 Precursor
IRF8	Interferon Regulatory Factor 8
PBX1	PBX Homeobox 1
ZBTB16	Zinc Finger And BTB Domain Containing 16
EP300	E1A Binding Protein P300
MPO	Myeloperoxidase
MCL1	MCL1 Apoptosis Regulator, BCL2 Family Member
MIR126	MicroRNA 126
RAD51	RAD51 Recombinase
MIR34A	MicroRNA 34a
CTNNB1	Catenin Beta 1
ITGA2B	Integrin Subunit Alpha 2b
ABCB1	ATP Binding Cassette Subfamily B Member 1
MIR17	MicroRNA 17
CTLA4	Cytotoxic T-Lymphocyte Associated Protein 4
DNAJC21	DnaJ Heat Shock Protein Family (Hsp40) Member C21
MIR125A	MicroRNA 125a
MYH11	Myosin Heavy Chain 11
AFF1	AF4/FMR2 Family Member 1
DDX41	DEAD-Box Helicase 41
TCF3	Transcription Factor 3
FANCA	FA Complementation Group A
CHIC2	Cysteine Rich Hydrophobic Domain 2
SETD2	SET Domain Containing 2, Histone Lysine Methyltransferase
MIR378A	MicroRNA 378a
TNF	Tumor Necrosis Factor
FIP1L1	Factor Interacting With PAPOLA And CPSF1
PRF1	Perforin 1
EPO	Erythropoietin
STAT5A	Signal Transducer And Activator Of Transcription 5A
MIR155	MicroRNA 155
PIK3CA	Phosphatidylinositol-4,5-Bisphosphate 3-Kinase Catalytic Subunit Alpha
MAP2K1	Mitogen-Activated Protein Kinase Kinase 1
MIR18A	MicroRNA 18a
IL6	Interleukin 6
MLF1	Myeloid Leukemia Factor 1
SH3GL1	SH3 Domain Containing GRB2 Like 1, Endophilin A2
CD34	CD34 Molecule
KITLG	KIT Ligand
EPOR	Erythropoietin Receptor
MIR127	MicroRNA 127
ACTB	Actin Beta
CBFA2T3	CBFA2/RUNX1 Partner Transcriptional Co-Repressor 3
SET	SET Nuclear Proto-Oncogene
CD33	CD33 Molecule
MIR210	MicroRNA 210
MIR27A	MicroRNA 27a
MIR15A	MicroRNA 15a
BCOR	BCL6 Corepressor
BRD4	Bromodomain Containing 4
LPP	LIM Domain Containing Preferred Translocation Partner In Lipoma
CASP3	Caspase 3
MIRLET7C	MicroRNA Let-7c
CDKN2B	Cyclin Dependent Kinase Inhibitor 2B
BRCA1	BRCA1 DNA Repair Associated
MIR424	MicroRNA 424
DEK	DEK Proto-Oncogene
FANCC	FA Complementation Group C
MYCN	MYCN Proto-Oncogene, BHLH Transcription Factor
HOXA9	Homeobox A9
KMT2D	Lysine Methyltransferase 2D
MEIS1	Meis Homeobox 1
IL2	Interleukin 2
CDKN1A	Cyclin Dependent Kinase Inhibitor 1A
HLA-C	Major Histocompatibility Complex, Class I, C
RBM15	RNA Binding Motif Protein 15
CXCL8	C-X-C Motif Chemokine Ligand 8
FAS	Fas Cell Surface Death Receptor
MIR199B	MicroRNA 199b
AKT1	AKT Serine/Threonine Kinase 1
IFNA1	Interferon Alpha 1
CSF1R	Colony Stimulating Factor 1 Receptor
IL1B	Interleukin 1 Beta
NBN	Nibrin
MIR130B	MicroRNA 130b
VEGFA	Vascular Endothelial Growth Factor A
DNTT	DNA Nucleotidylexotransferase
MIR29A	MicroRNA 29a
MIR145	MicroRNA 145
NOTCH1	Notch Receptor 1
CD38	CD38 Molecule
MIR181A2	MicroRNA 181a-2
STAT1	Signal Transducer And Activator Of Transcription 1
MIR106B	MicroRNA 106b
DNMT1	DNA Methyltransferase 1
ANPEP	Alanyl Aminopeptidase, Membrane
MIR30D	MicroRNA 30d
ANXA5	Annexin A5
EZH2	Enhancer Of Zeste 2 Polycomb Repressive Complex 2 Subunit
ITGAM	Integrin Subunit Alpha M
ERCC6L2	ERCC Excision Repair 6 Like 2
CSF1	Colony Stimulating Factor 1
EWSR1	EWS RNA Binding Protein 1
MIR331	MicroRNA 331
MIR34B	MicroRNA 34b
IL3RA	Interleukin 3 Receptor Subunit Alpha
LUC7L2	LUC7 Like 2, Pre-MRNA Splicing Factor
TGM6	Transglutaminase 6
MAPK8	Mitogen-Activated Protein Kinase 8
MIR326	MicroRNA 326
CXCL12	C-X-C Motif Chemokine Ligand 12
XIAP	X-Linked Inhibitor Of Apoptosis
LYN	LYN Proto-Oncogene, Src Family Tyrosine Kinase
CASP8	Caspase 8
HDAC9	Histone Deacetylase 9
JAK3	Janus Kinase 3
MIR320A	MicroRNA 320a
MIR204	MicroRNA 204
MIR324	MicroRNA 324
BCL2L1	BCL2 Like 1
CDK2	Cyclin Dependent Kinase 2
JAK1	Janus Kinase 1
ITGAX	Integrin Subunit Alpha X
CYCS	Cytochrome C, Somatic
CD8A	CD8a Molecule
SPI1	Spi-1 Proto-Oncogene
ABCC1	ATP Binding Cassette Subfamily C Member 1
DICER1	Dicer 1, Ribonuclease III
IL7	Interleukin 7
ERBB2	Erb-B2 Receptor Tyrosine Kinase 2
MAPK1	Mitogen-Activated Protein Kinase 1
ARHGAP26	Rho GTPase Activating Protein 26
DCK	Deoxycytidine Kinase
BMI1	BMI1 Proto-Oncogene, Polycomb Ring Finger
TFRC	Transferrin Receptor
TOP1	DNA Topoisomerase I
IL4	Interleukin 4
FOS	Fos Proto-Oncogene, AP-1 Transcription Factor Subunit
KLRK1	Killer Cell Lectin Like Receptor K1
MIR196A1	MicroRNA 196a-1
H2AC18	H2A Clustered Histone 18
BTK	Bruton Tyrosine Kinase
CREB1	CAMP Responsive Element Binding Protein 1
MMP9	Matrix Metallopeptidase 9
KDR	Kinase Insert Domain Receptor
PARP1	Poly(ADP-Ribose) Polymerase 1
PTPRC	Protein Tyrosine Phosphatase Receptor Type C
TNFRSF10B	TNF Receptor Superfamily Member 10b
FASLG	Fas Ligand
ALB	Albumin
BRAF	B-Raf Proto-Oncogene, Serine/Threonine Kinase
PRAME	PRAME Nuclear Receptor Transcriptional Regulator
MAPK3	Mitogen-Activated Protein Kinase 3
BAALC	BAALC Binder Of MAP3K1 And KLF4
CD19	CD19 Molecule
PROM1	Prominin 1
CCNA2	Cyclin A2
CDKN1B	Cyclin Dependent Kinase Inhibitor 1B
CD7	CD7 Molecule
JUN	Jun Proto-Oncogene, AP-1 Transcription Factor Subunit
BCL2L11	BCL2 Like 11
CDA	Cytidine Deaminase
FGF2	Fibroblast Growth Factor 2
MLLT1	MLLT1 Super Elongation Complex Subunit
ABCG2	ATP Binding Cassette Subfamily G Member 2 (Junior Blood Group)
HLA-A	Major Histocompatibility Complex, Class I, A
MEG3	Maternally Expressed 3
MVP	Major Vault Protein
CDK6	Cyclin Dependent Kinase 6
RARS1	Arginyl-TRNA Synthetase 1
CD80	CD80 Molecule
CLEC12A	C-Type Lectin Domain Family 12 Member A
CASP9	Caspase 9
BCL6	BCL6 Transcription Repressor
FLT1	Fms Related Receptor Tyrosine Kinase 1
LCK	LCK Proto-Oncogene, Src Family Tyrosine Kinase
CEBPB	CCAAT Enhancer Binding Protein Beta
THY1	Thy-1 Cell Surface Antigen
HAX1	HCLS1 Associated Protein X-1
CD44	CD44 Molecule (Indian Blood Group)
CD4	CD4 Molecule
B2M	Beta-2-Microglobulin
EGR1	Early Growth Response 1
CBFA2T2	CBFA2/RUNX1 Partner Transcriptional Co-Repressor 2
FLT3LG	Fms Related Receptor Tyrosine Kinase 3 Ligand
HSP90AA1	Heat Shock Protein 90 Alpha Family Class A Member 1
ITGB3	Integrin Subunit Beta 3
KIR3DL1	Killer Cell Immunoglobulin Like Receptor, Three Ig Domains And Long Cytoplasmic Tail 1
ANKRD26	Ankyrin Repeat Domain 26
AFDN	Afadin, Adherens Junction Formation Factor
KDM4C	Lysine Demethylase 4C
EGFR	Epidermal Growth Factor Receptor
HAVCR2	Hepatitis A Virus Cellular Receptor 2
RUNX3	RUNX Family Transcription Factor 3
IL15	Interleukin 15
SIRT1	Sirtuin 1
DNMT3B	DNA Methyltransferase 3 Beta
RUNX2	RUNX Family Transcription Factor 2
ALK	ALK Receptor Tyrosine Kinase
CEBPE	CCAAT Enhancer Binding Protein Epsilon
MME	Membrane Metalloendopeptidase
CD79A	CD79a Molecule
U2AF1L4	U2 Small Nuclear RNA Auxiliary Factor 1 Like 4
CCR6	C-C Motif Chemokine Receptor 6
LMO2	LIM Domain Only 2
CDK1	Cyclin Dependent Kinase 1
AURKB	Aurora Kinase B
CD274	CD274 Molecule
NCAM1	Neural Cell Adhesion Molecule 1
ZRSR2	Zinc Finger CCCH-Type, RNA Binding Motif And Serine/Arginine Rich 2
MIR21	MicroRNA 21
MTOR	Mechanistic Target Of Rapamycin Kinase
HOXA10	Homeobox A10
MTHFR	Methylenetetrahydrofolate Reductase
SYK	Spleen Associated Tyrosine Kinase
HLA-DRB1	Major Histocompatibility Complex, Class II, DR Beta 1
MIR142	MicroRNA 142
MIR9-1	MicroRNA 9-1
CDH1	Cadherin 1
HOTAIR	HOX Transcript Antisense RNA
MIR221	MicroRNA 221
FUT4	Fucosyltransferase 4
HIF1A	Hypoxia Inducible Factor 1 Subunit Alpha
GYPA	Glycophorin A (MNS Blood Group)
STAG2	Stromal Antigen 2
EIF4E	Eukaryotic Translation Initiation Factor 4E
PTPA	Protein Phosphatase 2 Phosphatase Activator
GRB2	Growth Factor Receptor Bound Protein 2
IL7R	Interleukin 7 Receptor
CD226	CD226 Molecule
MIR199A1	MicroRNA 199a-1
MIR150	MicroRNA 150
CD5	CD5 Molecule
AXL	AXL Receptor Tyrosine Kinase
FN1	Fibronectin 1
KMT2C	Lysine Methyltransferase 2C
HDAC1	Histone Deacetylase 1
LYL1	LYL1 Basic Helix-Loop-Helix Family Member
MIR146A	MicroRNA 146a
MIR181A1	MicroRNA 181a-1
FCGR3B	Fc Fragment Of IgG Receptor IIIb
FOXO3	Forkhead Box O3
GAPDH	Glyceraldehyde-3-Phosphate Dehydrogenase
SUZ12	SUZ12 Polycomb Repressive Complex 2 Subunit
MIR151A	MicroRNA 151a
MN1	MN1 Proto-Oncogene, Transcriptional Regulator
CD22	CD22 Molecule
ELL	Elongation Factor For RNA Polymerase II
PLK1	Polo Like Kinase 1
EIF4EBP1	Eukaryotic Translation Initiation Factor 4E Binding Protein 1
CDKN3	Cyclin Dependent Kinase Inhibitor 3
NTRK1	Neurotrophic Receptor Tyrosine Kinase 1
THBD	Thrombomodulin
VAV1	Vav Guanine Nucleotide Exchange Factor 1
MAP2K7	Mitogen-Activated Protein Kinase Kinase 7
PIM1	Pim-1 Proto-Oncogene, Serine/Threonine Kinase
MIR486-1	MicroRNA 486-1
IL1A	Interleukin 1 Alpha
CD86	CD86 Molecule
H4-16	H4 Histone 16
FCGR3A	Fc Fragment Of IgG Receptor IIIa
HOTAIRM1	HOXA Transcript Antisense RNA, Myeloid-Specific 1
CD2	CD2 Molecule
CDKN2B-AS1	CDKN2B Antisense RNA 1
PRAM1	PML-RARA Regulated Adaptor Molecule 1
NCOA2	Nuclear Receptor Coactivator 2
PMAIP1	Phorbol-12-Myristate-13-Acetate-Induced Protein 1
TNFRSF8	TNF Receptor Superfamily Member 8
MIR574	MicroRNA 574
CCR5	C-C Motif Chemokine Receptor 5
EGF	Epidermal Growth Factor
SPN	Sialophorin
UCA1	Urothelial Cancer Associated 1
FBXW7	F-Box And WD Repeat Domain Containing 7
MIR128-2	MicroRNA 128-2
MIR222	MicroRNA 222
EVPL	Envoplakin
FOXP3	Forkhead Box P3
ARHGEF1	Rho Guanine Nucleotide Exchange Factor 1
NCOR1	Nuclear Receptor Corepressor 1
ICOSLG	Inducible T Cell Costimulator Ligand
RPS6KB1	Ribosomal Protein S6 Kinase B1
MIR29B1	MicroRNA 29b-1
XPO1	Exportin 1
CHEK1	Checkpoint Kinase 1
PHF6	PHD Finger Protein 6
IGF1R	Insulin Like Growth Factor 1 Receptor
TNFRSF1A	TNF Receptor Superfamily Member 1A
TRIB2	Tribbles Pseudokinase 2
MIR22	MicroRNA 22
KIR2DL1	Killer Cell Immunoglobulin Like Receptor, Two Ig Domains And Long Cytoplasmic Tail 1
NCOR2	Nuclear Receptor Corepressor 2
CD28	CD28 Molecule
MIR23A	MicroRNA 23a
HOXA7	Homeobox A7
KDM5A	Lysine Demethylase 5A
KIR2DL3	Killer Cell Immunoglobulin Like Receptor, Two Ig Domains And Long Cytoplasmic Tail 3
BCL2L2	BCL2 Like 2
ERCC6	ERCC Excision Repair 6, Chromatin Remodeling Factor
TET1	Tet Methylcytosine Dioxygenase 1
IGHV4-38-2	Immunoglobulin Heavy Variable 4-38-2
MIR23B	MicroRNA 23b
DIABLO	Diablo IAP-Binding Mitochondrial Protein
TNFRSF9	TNF Receptor Superfamily Member 9
MIRLET7B	MicroRNA Let-7b
CARTPT	CART Prepropeptide
HDAC2	Histone Deacetylase 2
SELP	Selectin P
MIR30A	MicroRNA 30a
CD55	CD55 Molecule (Cromer Blood Group)
SIGLEC5	Sialic Acid Binding Ig Like Lectin 5
MIR15B	MicroRNA 15b
CDK9	Cyclin Dependent Kinase 9
MIR128-1	MicroRNA 128-1
KDM6A	Lysine Demethylase 6A
ESR1	Estrogen Receptor 1
MIR451A	MicroRNA 451a
CD47	CD47 Molecule
MIR335	MicroRNA 335
NCL	Nucleolin
MIR130A	MicroRNA 130a
SERPINC1	Serpin Family C Member 1
CCDC26	CCDC26 Long Non-Coding RNA
KLRD1	Killer Cell Lectin Like Receptor D1
FCGR1A	Fc Fragment Of IgG Receptor Ia
NCR3	Natural Cytotoxicity Triggering Receptor 3
MIR27B	MicroRNA 27b
ANXA8	Annexin A8
MIR193A	MicroRNA 193a
SERPINA3	Serpin Family A Member 3
MIR182	MicroRNA 182
MIR147A	MicroRNA 147a
MIRLET7E	MicroRNA Let-7e
GMPS	Guanine Monophosphate Synthase
NCR1	Natural Cytotoxicity Triggering Receptor 1
MALAT1	Metastasis Associated Lung Adenocarcinoma Transcript 1
MIR483	MicroRNA 483
VWF	Von Willebrand Factor
KLF4	Kruppel Like Factor 4
CD96	CD96 Molecule
TET3	Tet Methylcytosine Dioxygenase 3
DOT1L	DOT1 Like Histone Lysine Methyltransferase
TNFRSF1B	TNF Receptor Superfamily Member 1B
RPS3A	Ribosomal Protein S3A
ELN	Elastin
TUG1	Taurine Up-Regulated 1
MIR339	MicroRNA 339
MIR30C1	MicroRNA 30c-1
MIR140	MicroRNA 140
MIR31	MicroRNA 31
FOXO1	Forkhead Box O1
MIR195	MicroRNA 195
BRD2	Bromodomain Containing 2
CD40LG	CD40 Ligand
KLRC1	Killer Cell Lectin Like Receptor C1
BCORL1	BCL6 Corepressor Like 1
HOXA5	Homeobox A5
POU5F1	POU Class 5 Homeobox 1
MIR30E	MicroRNA 30e
AR	Androgen Receptor
SMC3	Structural Maintenance Of Chromosomes 3
MIR532	MicroRNA 532
KDM1A	Lysine Demethylase 1A
MIR338	MicroRNA 338
SMC1A	Structural Maintenance Of Chromosomes 1A
PSMA7	Proteasome 20S Subunit Alpha 7
BHLHE40	Basic Helix-Loop-Helix Family Member E40
COLEC10	Collectin Subfamily Member 10
MIR154	MicroRNA 154
MIR455	MicroRNA 455
MIR374A	MicroRNA 374a
MIR542	MicroRNA 542
MIR628	MicroRNA 628
MIR423	MicroRNA 423
HDAC6	Histone Deacetylase 6
WT1-AS	WT1 Antisense RNA
CTCF	CCCTC-Binding Factor
NCR2	Natural Cytotoxicity Triggering Receptor 2
CCAT1	Colon Cancer Associated Transcript 1
SOX2	SRY-Box Transcription Factor 2
FER	FER Tyrosine Kinase
CD24	CD24 Molecule
H4C1	H4 Clustered Histone 1
MIR28	MicroRNA 28
SLAMF1	Signaling Lymphocytic Activation Molecule Family Member 1
METTL3	Methyltransferase Like 3
STUB1	STIP1 Homology And U-Box Containing Protein 1
ALDH1A1	Aldehyde Dehydrogenase 1 Family Member A1
AGO2	Argonaute RISC Catalytic Component 2
SNAI1	Snail Family Transcriptional Repressor 1
CD14	CD14 Molecule
MIR34C	MicroRNA 34c
NANOG	Nanog Homeobox
ANGPT1	Angiopoietin 1
BRD3	Bromodomain Containing 3
PCM1	Pericentriolar Material 1
MIR328	MicroRNA 328
CD48	CD48 Molecule
TCHP	Trichoplein Keratin Filament Binding
MATK	Megakaryocyte-Associated Tyrosine Kinase
MIR181C	MicroRNA 181c
MIR340	MicroRNA 340
H4C3	H4 Clustered Histone 3
MIR337	MicroRNA 337
MIR582	MicroRNA 582
PSMD5	Proteasome 26S Subunit, Non-ATPase 5
H4C2	H4 Clustered Histone 2
H4C9	H4 Clustered Histone 9
PRDM10	PR/SET Domain 10
MIR212	MicroRNA 212
MIR223HG	MIR223 Host Gene
MIR302D	MicroRNA 302d
MIR367	MicroRNA 367
MIR184	MicroRNA 184
LCOR	Ligand Dependent Nuclear Receptor Corepressor
LSR	Lipolysis Stimulated Lipoprotein Receptor
H3-2	H3.2 Histone (Putative)
TLR2	Toll Like Receptor 2
PSMD4	Proteasome 26S Subunit, Non-ATPase 4
H4C14	H4 Clustered Histone 14
H4C8	H4 Clustered Histone 8
H4C15	H4 Clustered Histone 15
MIR219A1	MicroRNA 219a-1
BRDT	Bromodomain Testis Associated
CEP70	Centrosomal Protein 70
MIR330	MicroRNA 330
PRODH	Proline Dehydrogenase 1
H4C13	H4 Clustered Histone 13
IRAIN	IGF1R Antisense Imprinted Non-Protein Coding RNA
MIR590	MicroRNA 590
ZNF23	Zinc Finger Protein 23
H4C12	H4 Clustered Histone 12
NSMCE3	NSE3 Homolog, SMC5-SMC6 Complex Component
MIR615	MicroRNA 615
H4C11	H4 Clustered Histone 11
KLRC2	Killer Cell Lectin Like Receptor C2
SULT2B1	Sulfotransferase Family 2B Member 1
H4C4	H4 Clustered Histone 4
H4C5	H4 Clustered Histone 5
MIR376A1	MicroRNA 376a-1
H4C6	H4 Clustered Histone 6
G6PC3	Glucose-6-Phosphatase Catalytic Subunit 3
MIR372	MicroRNA 372
MIR432	MicroRNA 432
TUSC7	Tumor Suppressor Candidate 7
MIR744	MicroRNA 744
MIR325	MicroRNA 325
ENSG00000287119
SERPINE1	Serpin Family E Member 1
F2	Coagulation Factor II, Thrombin
KLF1	Kruppel Like Factor 1
LOC106992256	T(11;20)(P15;Q11) Topoisomerase (DNA) I Recombination Region
HLA-B	Major Histocompatibility Complex, Class I, B
HGF	Hepatocyte Growth Factor
CRP	C-Reactive Protein
DHFR	Dihydrofolate Reductase
EIF6	Eukaryotic Translation Initiation Factor 6
F3	Coagulation Factor III, Tissue Factor
LOC107133509	NUP98-NSD3 Recombination Region
ITGAL	Integrin Subunit Alpha L
CCL3	C-C Motif Chemokine Ligand 3
FHL2	Four And A Half LIM Domains 2
G6PD	Glucose-6-Phosphate Dehydrogenase
APOE	Apolipoprotein E
ACP1	Acid Phosphatase 1
VDR	Vitamin D Receptor
IL1R1	Interleukin 1 Receptor Type 1
HLA-DPB1	Major Histocompatibility Complex, Class II, DP Beta 1
IL1RN	Interleukin 1 Receptor Antagonist
HP	Haptoglobin
IGF1	Insulin Like Growth Factor 1
C5	Complement C5
VCAM1	Vascular Cell Adhesion Molecule 1
GATA3	GATA Binding Protein 3
LOC107197952	NUP98-HOXA9 Recombination Region
KMT2E	Lysine Methyltransferase 2E (Inactive)
HLA-DQB1	Major Histocompatibility Complex, Class II, DQ Beta 1
HBB	Hemoglobin Subunit Beta
SEC23B	SEC23 Homolog B, COPII Coat Complex Component
IL6R	Interleukin 6 Receptor
KIF23	Kinesin Family Member 23
IL17A	Interleukin 17A
SELE	Selectin E
C3	Complement C3
IFNB1	Interferon Beta 1
ANGPT2	Angiopoietin 2
THBS1	Thrombospondin 1
LOC107126281	NUP98-HOXA11 Recombination Region
IL18R1	Interleukin 18 Receptor 1
CCL5	C-C Motif Chemokine Ligand 5
CD46	CD46 Molecule
LOC107126288	NUP98-HOXA13 Recombination Region
PLAGL2	PLAG1 Like Zinc Finger 2
VHL	Von Hippel-Lindau Tumor Suppressor
CXCL10	C-X-C Motif Chemokine Ligand 10
WDR48	WD Repeat Domain 48
CAMP	Cathelicidin Antimicrobial Peptide
LOC106865369	Nucleoporin 98kDa Recombination Region
TGIF1	TGFB Induced Factor Homeobox 1
HDC	Histidine Decarboxylase
DIAPH3	Diaphanous Related Formin 3
CALCA	Calcitonin Related Polypeptide Alpha
NOD2	Nucleotide Binding Oligomerization Domain Containing 2
HMOX1	Heme Oxygenase 1
LEPQTL1	Leptin, Serum Levels Of
LOC107126359	NUP98-HOXD13 Recombination Region
IGHE	Immunoglobulin Heavy Constant Epsilon
FTL	Ferritin Light Chain
MAN1B1	Mannosidase Alpha Class 1B Member 1
MKI67	Marker Of Proliferation Ki-67
RPN2	Ribophorin II
LOC106865368	Inversion(11)(P15q22) DEAD (Asp-Glu-Ala-Asp) Box Polypeptide 10 Recombination Region
CDAN1	Codanin 1
FGA	Fibrinogen Alpha Chain
CDIN1	CDAN1 Interacting Nuclease 1
MRPL46	Mitochondrial Ribosomal Protein L46
RRM2B	Ribonucleotide Reductase Regulatory TP53 Inducible Subunit M2B
GAS2L3	Growth Arrest Specific 2 Like 3
PERM1	PPARGC1 And ESRR Induced Regulator, Muscle 1
LOC107195252	NUP98-HHEX Recombination Region
LOC107133517	NUP98-IQCG Recombination Region
GYPC	Glycophorin C (Gerbich Blood Group)
KIR2DS1	Killer Cell Immunoglobulin Like Receptor, Two Ig Domains And Short Cytoplasmic Tail 1
LOC107105350	NUP98-HOXC11 Recombination Region
KIR2DS2	Killer Cell Immunoglobulin Like Receptor, Two Ig Domains And Short Cytoplasmic Tail 2
LOC107133518	NUP98-TOP2B Recombination Region
SERPINB2	Serpin Family B Member 2
KIR2DS4	Killer Cell Immunoglobulin Like Receptor, Two Ig Domains And Short Cytoplasmic Tail 4
CPT1A	Carnitine Palmitoyltransferase 1A
KIR2DS3	Killer Cell Immunoglobulin Like Receptor, Two Ig Domains And Short Cytoplasmic Tail 3
KIR3DS1	Killer Cell Immunoglobulin Like Receptor, Three Ig Domains And Short Cytoplasmic Tail 1
KIR2DS5	Killer Cell Immunoglobulin Like Receptor, Two Ig Domains And Short Cytoplasmic Tail 5
MUC16	Mucin 16, Cell Surface Associated
KIR2DL5A	Killer Cell Immunoglobulin Like Receptor, Two Ig Domains And Long Cytoplasmic Tail 5A
KIR2DL2	Killer Cell Immunoglobulin Like Receptor, Two Ig Domains And Long Cytoplasmic Tail 2
CABIN1	Calcineurin Binding Protein 1
GH1	Growth Hormone 1
HBA2	Hemoglobin Subunit Alpha 2
SLC17A5	Solute Carrier Family 17 Member 5
NPPB	Natriuretic Peptide B
